# Supplementary material for: A Transcriptomic and Proteomic Analysis of the Diaphorina citri Salivary Glands Reveals Genes Responding to Candidatus Liberibacter asiaticus
Source: Front Physiol. 2020 Sep 25;11:582505. doi: 10.3389/fphys.2020.582505 (PMC7546269; doi:10.3389/fphys.2020.582505)
Supplement: TABLE S3 — Summary of all differentially expressed genes. [file Data_Sheet_3.xlsx]

## Sheet: Sheet1
gene_id	gene_name	gene_locus	SG_HLB_FPKM	SG_CK_FPKM	log2FoldChange	pvalue	padj	Description	biological_process	biological_process_description	cellular_component	cellular_component_description	molecular_function	molecular_function_description	KEGG AnnotInfo	KEGG url	Gene name	Interpro Description
XLOC_013283	XLOC_013283	ScVcwli_2502:256002-298797	1.80119	0	14.0898	9.12677e-05	0.00874226		--	--	--	--	--	--	--	--	--	--
DcitrP035455.1	DcitrP035455.1	ScVcwli_1328:1249-36121	1.08034	0	13.053	1.16152e-06	0.000286095	>DcitrP035455.1.1 regulatory particle non-ATPase 12 partial-RA. (AHRD V3.11 *** 26S proteasome non-ATPase regulatory subunit 8-like Protein tr|D2A2W4|D2A2W4_TRICA). Similar to MCOT03904.0.CT. AED 0.22| InterPro:IPR033464,Pfam:PF10075	--	--	--	--	--	--	K03031 26S proteasome regulatory subunit N12 | (RefSeq) 26S proteasome non-ATPase regulatory subunit 8	http://www.genome.jp/dbget-bin/www_bget?api:100163214	DcitrP035455.1	regulatory particle non-ATPase 12 partial-RA. (AHRD V3.11 *** 26S proteasome non-ATPase regulatory subunit 8-like Protein tr|D2A2W4|D2A2W4_TRICA). Similar to MCOT03904.0.CT. AED 0.22
XLOC_029679	XLOC_029679	ScVcwli_483:444589-521157	0.369577	0	12.6105	1.76218e-21	1.82297e-17		--	--	--	--	--	--	--	--	--	--
XLOC_020214	XLOC_020214	ScVcwli_3312:53900-95487	0.330317	0	11.4286	1.85891e-09	1.15903e-06		--	--	--	--	--	--	--	--	--	--
DcitrP019760.1	DcitrP019760.1	ScVcwli_845:461710-463286	7.66794	0	11.4138	6.23594e-06	0.00110275	>DcitrP019760.1.1 60S ribosomal protein L18a (AHRD V3.11 *** tr|R4WI60|R4WI60_RIPPE). Similar to MCOT02384.0.CC NP_001284617.1. AED 0.36| InterPro:IPR023573,Pfam:PF01775| GO:0003735,GO:0005840,GO:0006412	GO:0006412	translation	GO:0005840	ribosome	GO:0003735	structural constituent of ribosome	K02882 large subunit ribosomal protein L18Ae | (RefSeq) Rpl18a; ribosomal protein L18A	http://www.genome.jp/dbget-bin/www_bget?api:100145820	DcitrP019760.1	60S ribosomal protein L18a (AHRD V3.11 *** tr|R4WI60|R4WI60_RIPPE). Similar to MCOT02384.0.CC NP_001284617.1. AED 0.36
DcitrP102650.1	DcitrP102650.1	ScVcwli_3658:133920-141094	1.65615	0	11.3161	1.73278e-09	1.12035e-06	>DcitrP102650.1.1 Trafficking kinesin-binding protein milt (AHRD V3.11 *-* tr|A0A195BL26|A0A195BL26_9HYME). AED 0.58| InterPro:IPR006933,Pfam:PF04849	GO:0006914//GO:0006397//GO:0006904//GO:0015031//GO:0015991	autophagy//mRNA processing//vesicle docking involved in exocytosis//protein transport//ATP hydrolysis coupled proton transport	GO:0000145//GO:0033179	exocyst//proton-transporting V-type ATPase, V0 domain	GO:0015078//GO:0005515	hydrogen ion transmembrane transporter activity//protein binding	K15369 trafficking kinesin-binding protein 1 | (RefSeq) trafficking kinesin-binding protein milt	http://www.genome.jp/dbget-bin/www_bget?api:100167193	DcitrP102650.1	Trafficking kinesin-binding protein milt (AHRD V3.11 *-* tr|A0A195BL26|A0A195BL26_9HYME). AED 0.58
XLOC_034004	XLOC_034004	ScVcwli_930:51628-199739	0.065191	0	11.0942	0.000394907	0.0263569		--	--	--	--	--	--	--	--	--	--
XLOC_004924	XLOC_004924	ScVcwli_153:738938-762299	0.429668	0	11.0214	5.06048e-09	2.55369e-06		--	--	--	--	--	--	--	--	--	--
DcitrP048525.1	DcitrP048525.1	ScVcwli_1997:68065-76278	1.27733	0	10.9939	0.000429455	0.0280725	DcitrP048525.1.1 Eukaryotic translation initiation factor 5 (AHRD V3.11 *** tr|A0A067QT43|A0A067QT43_ZOONE). Similar to MCOT03170.0.CT XP_017303324.1. AED 0.12	GO:0006413	translational initiation	--	--	GO:0005515//GO:0003743	protein binding//translation initiation factor activity	K03262 translation initiation factor 5 | (RefSeq) eukaryotic translation initiation factor 5	http://www.genome.jp/dbget-bin/www_bget?api:100165180	DcitrP048525.1	Eukaryotic translation initiation factor 5 (AHRD V3.11 *** tr|A0A067QT43|A0A067QT43_ZOONE). Similar to MCOT03170.0.CT XP_017303324.1. AED 0.12
XLOC_014767	XLOC_014767	ScVcwli_2636:374911-425562	0.20362	0	10.9686	0.000439309	0.0283973		--	--	--	--	--	--	--	--	--	--
DcitrP065090.1	DcitrP065090.1	ScVcwli_2618:10018-21132	0.839389	0	10.9177	1.27979e-05	0.00194698	>DcitrP065090.1.1 Cyclin-dependent kinases regulatory subunit (AHRD V3.11 *** tr|Q9VHN1|Q9VHN1_DROME). AED 0.13| InterPro:IPR000789,Pfam:PF01111| GO:0007049,GO:0016538	GO:0007049	cell cycle	--	--	GO:0016538	cyclin-dependent protein serine/threonine kinase regulator activity	K02219 cyclin-dependent kinase regulatory subunit CKS1 | (RefSeq) cyclin-dependent kinases regulatory subunit-like	http://www.genome.jp/dbget-bin/www_bget?api:100166292	DcitrP065090.1	Cyclin-dependent kinases regulatory subunit (AHRD V3.11 *** tr|Q9VHN1|Q9VHN1_DROME). AED 0.13
XLOC_000652	XLOC_000652	ScVcwli_104:301635-343256	0.232129	0	10.8752	0.000480098	0.0298295		--	--	--	--	--	--	--	--	--	--
DcitrP030840.1	DcitrP030840.1	ScVcwli_1145:420519-455459	0.245532	0	10.8292	3.23083e-17	1.33692e-13	>DcitrP030840.1.1 Unknown protein. AED 0.54	--	--	--	--	--	--	--	--	DcitrP030840.1	Unknown protein. AED 0.54
XLOC_028258	XLOC_028258	ScVcwli_3666:139170-194465	0.143596	0	10.804	0.000519063	0.0316797		--	--	--	--	--	--	--	--	--	--
XLOC_017683	XLOC_017683	ScVcwli_2989:183258-226304	0.1839	0	10.7566	2.31012e-05	0.00305814		--	--	--	--	--	--	--	--	--	--
XLOC_000647	XLOC_000647	ScVcwli_104:358819-374976	0.44647	0	10.6337	4.40344e-08	1.6565e-05		--	--	--	--	--	--	--	--	--	--
XLOC_007032	XLOC_007032	ScVcwli_1771:217740-246545	0.263931	0	10.5634	5.93683e-05	0.0064991		--	--	--	--	--	--	--	--	--	--
XLOC_031589	XLOC_031589	ScVcwli_694:181472-204772	0.300806	0	10.498	3.10682e-05	0.00384283	gnl|BL_ORD_ID|284792 sp|Q4LBB6|OCTB3_DROME Octopamine receptor beta-3R OS=Drosophila melanogaster OX=7227 GN=Octbeta3R PE=2 SV=4//8.88624e-42	--	--	--	--	--	--	--	--	--	--
XLOC_024696	XLOC_024696	ScVcwli_3505:413625-438007	0.279822	0	10.4087	2.43133e-07	7.29046e-05		--	--	--	--	--	--	--	--	--	--
DcitrP039655.1	DcitrP039655.1	ScVcwli_1571:38818-51861	0.48222	0	10.3811	4.86859e-14	1.43902e-10	>DcitrP039655.1.1 Unknown protein. AED 0.04	--	--	GO:0005634	nucleus	GO:0008270	zinc ion binding	--	--	DcitrP039655.1	Unknown protein. AED 0.04
XLOC_016781	XLOC_016781	ScVcwli_284:465196-499871	0.18545	0	10.288	0.000946302	0.0484628		--	--	--	--	--	--	--	--	--	--
DcitrP080720.1	DcitrP080720.1	ScVcwli_3312:1112458-1180772	0.0859055	0	10.2645	2.32435e-07	7.07218e-05	>DcitrP080720.1.1 Cuticle Protein CPAP3-RA. (AHRD V3.11 *** Chondroitin proteoglycan 2 tr|A0A0K8V7P5|A0A0K8V7P5_BACLA). Similar to MCOT23329.0.CT. AED 0.05	GO:0006030	chitin metabolic process	GO:0005576	extracellular region	GO:0008061	chitin binding	no KO assigned | (RefSeq) Cpap3-d2; cuticular protein analogous to peritrophins 3-D2	http://www.genome.jp/dbget-bin/www_bget?api:100160268	DcitrP080720.1	Cuticle Protein CPAP3-RA. (AHRD V3.11 *** Chondroitin proteoglycan 2 tr|A0A0K8V7P5|A0A0K8V7P5_BACLA). Similar to MCOT23329.0.CT. AED 0.05
XLOC_021272	XLOC_021272	ScVcwli_3367:524902-558200	0.157217	0	10.2054	7.50203e-05	0.00760868		--	--	--	--	--	--	--	--	--	--
DcitrP021470.1	DcitrP021470.1	ScVcwli_893:312189-364477	0.0984488	0	10.1568	8.76658e-05	0.00851552	>DcitrP021470.1.1 Casein kinase I isoform alpha (AHRD V3.11 *** tr|A0A0A9W6N0|A0A0A9W6N0_LYGHE). Similar to MCOT12790.2.CO XP_008474898.1.	GO:0006468	protein phosphorylation	GO:0016020	membrane	GO:0004672//GO:0016773//GO:0005524	protein kinase activity//phosphotransferase activity, alcohol group as acceptor//ATP binding	K08957 casein kinase 1, alpha [EC:2.7.11.1] | (RefSeq) casein kinase I isoform alpha	http://www.genome.jp/dbget-bin/www_bget?api:100166787	DcitrP021470.1	Casein kinase I isoform alpha (AHRD V3.11 *** tr|A0A0A9W6N0|A0A0A9W6N0_LYGHE). Similar to MCOT12790.2.CO XP_008474898.1. AED 0.28
DcitrP027325.1	DcitrP027325.1	ScVcwli_1044:777601-864042	0.0775447	0	10.1115	6.47477e-05	0.00694109	>DcitrP027325.1.2 vesicular glutamate transporter 1-RB. (AHRD V3.11 *** AAEL001209-PA tr|Q17LW3|Q17LW3_AEDAE). Similar to MCOT00418.0.CT XP_017297933.1. AED 0.28	GO:0055085	transmembrane transport	GO:0016021	integral component of membrane	--	--	no KO assigned | (RefSeq) putative inorganic phosphate cotransporter	http://www.genome.jp/dbget-bin/www_bget?api:100164256	DcitrP027325.1	vesicular glutamate transporter 1-RB. (AHRD V3.11 *** AAEL001209-PA tr|Q17LW3|Q17LW3_AEDAE). Similar to MCOT00418.0.CT XP_017297933.1. AED 0.28||vesicular glutamate transporter 1-RA. (AHRD V3.11 *** AAEL001209-PA tr|Q17LW3|Q17LW3_AEDAE). Similar to MCOT00418.0.CT XP_017297933.1. AED 0.27
XLOC_031299	XLOC_031299	ScVcwli_648:369444-385176	0.315598	0	10.0692	5.12901e-07	0.000139631		--	--	--	--	--	--	--	--	--	--
DcitrP033280.1	DcitrP033280.1	ScVcwli_1258:425435-503794	0.0630025	0	9.99069	9.0792e-05	0.00873715	DcitrP033280.1.1 Beat-IIa (AHRD V3.11 *** tr|A0A0M4F3Q8|A0A0M4F3Q8_DROBS). Similar to MCOT11228.0.TT. AED 0.48	--	--	--	--	GO:0005515	protein binding	no KO assigned | (RefSeq) uncharacterized LOC100573338	http://www.genome.jp/dbget-bin/www_bget?api:100573338	DcitrP033280.1	Beat-IIa (AHRD V3.11 *** tr|A0A0M4F3Q8|A0A0M4F3Q8_DROBS). Similar to MCOT11228.0.TT. AED 0.48
XLOC_023984	XLOC_023984	ScVcwli_3485:18987-33482	0.315351	0	9.96302	8.45037e-11	1.09274e-07		--	--	--	--	--	--	--	--	--	--
DcitrP027390.1	DcitrP027390.1	ScVcwli_1045:302414-375821	0.058408	0	9.83561	0.000124635	0.0112117	>DcitrP027390.1.1 Nephrin (AHRD V3.11 *-* tr|A0A154P457|A0A154P457_9HYME). Similar to MCOT12480.0.CO. AED 0.04	--	--	--	--	GO:0005515	protein binding	no KO assigned | (RefSeq) nephrin-like	http://www.genome.jp/dbget-bin/www_bget?api:100166034	DcitrP027390.1	Nephrin (AHRD V3.11 *-* tr|A0A154P457|A0A154P457_9HYME). Similar to MCOT12480.0.CO. AED 0.04
DcitrP085710.1	DcitrP085710.1	ScVcwli_3412:72831-106526	0.126811	0	9.80748	3.44057e-06	0.000713059	>DcitrP085710.1.1 Gag-pol polyprotein (AHRD V3.11 *-* tr|A0A0L7KRI4|A0A0L7KRI4_9NEOP). Similar to MCOT11068.0.MT. AED 0.00	--	--	--	--	--	--	no KO assigned | (RefSeq) uncharacterized LOC103310081	http://www.genome.jp/dbget-bin/www_bget?api:103310081	DcitrP085710.1	Gag-pol polyprotein (AHRD V3.11 *-* tr|A0A0L7KRI4|A0A0L7KRI4_9NEOP). Similar to MCOT11068.0.MT. AED 0.00
DcitrP090980.1	DcitrP090980.1	ScVcwli_3480:644867-778482	0.027872	0	9.71532	0.000174942	0.014595	>DcitrP090980.1.1 MDS1 and EVI1 complex locus protein EVI1-like (AHRD V3.11 *** tr|A0A1W4X9L2|A0A1W4X9L2_AGRPL). Similar to MCOT06381.0.CC XP_008471759.1. AED 0.00	--	--	--	--	GO:0008270//GO:0046872//GO:0003677	zinc ion binding//metal ion binding//DNA binding	no KO assigned | (RefSeq) alpha-protein kinase 1-like	http://www.genome.jp/dbget-bin/www_bget?api:100167703	DcitrP090980.1	MDS1 and EVI1 complex locus protein EVI1-like (AHRD V3.11 *** tr|A0A1W4X9L2|A0A1W4X9L2_AGRPL). Similar to MCOT06381.0.CC XP_008471759.1. AED 0.00
DcitrP033855.1	DcitrP033855.1	ScVcwli_1282:39575-60977	0.170532	0	9.61704	8.96992e-10	6.62813e-07	>DcitrP033855.1.1 Adenylosuccinate lyase (AHRD V3.11 *-* tr|A0A1B6F9S4|A0A1B6F9S4_9HEMI). AED 0.33| InterPro:IPR022761,Pfam:PF00206	--	--	--	--	--	--	K01756 adenylosuccinate lyase [EC:4.3.2.2] | (RefSeq) adenylosuccinate lyase-like	http://www.genome.jp/dbget-bin/www_bget?api:100166999	DcitrP033855.1	Adenylosuccinate lyase (AHRD V3.11 *-* tr|A0A1B6F9S4|A0A1B6F9S4_9HEMI). AED 0.33
DcitrP055325.1	DcitrP055325.1	ScVcwli_2255:203906-260669	0.0698017	0	9.61426	1.01834e-05	0.00164606	>DcitrP055325.1.1 Lachesin (AHRD V3.11 *** tr|A0A0K8SXE7|A0A0K8SXE7_LYGHE). AED 0.21	GO:0006418	tRNA aminoacylation for protein translation	GO:0005737	cytoplasm	GO:0003993//GO:0004812//GO:0005515//GO:0000166//GO:0046872//GO:0005524	acid phosphatase activity//aminoacyl-tRNA ligase activity//protein binding//nucleotide binding//metal ion binding//ATP binding	no KO assigned | (RefSeq) neural cell adhesion molecule 1	http://www.genome.jp/dbget-bin/www_bget?api:100159428	DcitrP055325.1	Lachesin (AHRD V3.11 *** tr|A0A0K8SXE7|A0A0K8SXE7_LYGHE). AED 0.21
XLOC_029287	XLOC_029287	ScVcwli_439:1436503-1442687	0.619171	0	9.60225	6.15872e-09	3.0339e-06		--	--	--	--	--	--	--	--	--	--
XLOC_014926	XLOC_014926	ScVcwli_2645:2380737-2389709	0.40351	0	9.54671	7.1021e-06	0.00124528		--	--	--	--	--	--	--	--	--	--
XLOC_027664	XLOC_027664	ScVcwli_3638:1402177-1417288	0.251989	0	9.54032	0.000284534	0.0212527		--	--	--	--	--	--	--	--	--	--
DcitrP021700.1	DcitrP021700.1	ScVcwli_898:138205-179451	0.0910245	0	9.53052	0.00040631	0.026871	>DcitrP021700.1.1 Unknown protein. AED 0.87	--	--	--	--	--	--	--	--	DcitrP021700.1	Unknown protein. AED 0.87
DcitrP098140.1	DcitrP098140.1	ScVcwli_3580:341590-344318	1.19005	0	9.43856	5.41349e-06	0.000991196	Mitochondrial uncoupling protein (AHRD V3.11 *-* tr|A0A026WFB2|A0A026WFB2_OOCBI). AED 0.57| InterPro:IPR018108,Pfam:PF00153	--	--	--	--	--	--	K15108 solute carrier family 25 (mitochondrial thiamine pyrophosphate transporter), member 19 | (RefSeq) mitochondrial thiamine pyrophosphate carrier-like	http://www.genome.jp/dbget-bin/www_bget?api:100159495	DcitrP098140.1	Mitochondrial uncoupling protein (AHRD V3.11 *-* tr|A0A026WFB2|A0A026WFB2_OOCBI). AED 0.57
DcitrP091100.1	DcitrP091100.1	ScVcwli_3480:1362854-1377686	0.205512	0	9.34073	0.000377922	0.0258914	>DcitrP091100.1.1 Unknown protein. AED 0.18	--	--	--	--	--	--	--	--	DcitrP091100.1	Unknown protein. AED 0.18
DcitrP006975.1	DcitrP006975.1	ScVcwli_331:122855-141022	0.166298	0	9.33098	9.34938e-06	0.00153523	>DcitrP006975.1.1 Unknown protein. AED 0.07	--	--	--	--	--	--	--	--	DcitrP006975.1	Unknown protein. AED 0.07
DcitrP054360.1	DcitrP054360.1	ScVcwli_2195:939840-958290	0.154261	0	9.24056	1.59119e-05	0.00228624	>DcitrP054360.1.1 Unknown protein. AED 0.31	--	--	--	--	--	--	--	--	DcitrP054360.1	Unknown protein. AED 0.31
XLOC_026517	XLOC_026517	ScVcwli_3582:63797-76024	0.252902	0	9.23941	0.000569964	0.0334066		--	--	--	--	--	--	--	--	--	--
DcitrP078210.1	DcitrP078210.1	ScVcwli_3189:135035-191112	0.0528622	0	9.23116	1.35478e-05	0.00203119	>DcitrP078210.1.1 Steroid receptor seven-up, isoforms B/C (AHRD V3.11 *** tr|A0A154P4P4|A0A154P4P4_9HYME). Similar to MCOT19996.1.CT. AED 0.00	GO:0006355//GO:0043401	regulation of transcription, DNA-templated//steroid hormone mediated signaling pathway	--	--	--	--	K14032 nuclear receptor subfamily 2 group F member 3 | (RefSeq) nuclear receptor subfamily 2 group F member 1-B	http://www.genome.jp/dbget-bin/www_bget?api:100164500	DcitrP078210.1	Steroid receptor seven-up, isoforms B/C (AHRD V3.11 *** tr|A0A154P4P4|A0A154P4P4_9HYME). Similar to MCOT19996.1.CT. AED 0.00
DcitrP021250.1	DcitrP021250.1	ScVcwli_870:956650-968628	0.235369	0	9.18935	0.000521926	0.0317607	>DcitrP021250.1.1 Constitutive coactivator of PPAR-gamma-like protein 1	--	--	--	--	--	--	no KO assigned | (RefSeq) constitutive coactivator of PPAR-gamma-like protein 1 homolog	http://www.genome.jp/dbget-bin/www_bget?api:100167228	DcitrP021250.1	Constitutive coactivator of PPAR-gamma-like protein 1 (AHRD V3.11 *-* tr|A0A146M8H7|A0A146M8H7_LYGHE). AED 0.38
DcitrP077305.1	DcitrP077305.1	ScVcwli_3161:49188-124008	0.0368685	0	9.17143	0.000538617	0.0323014	>DcitrP077305.1.1 Cathepsin F-like protein 5-RA. (AHRD V3.11 *-* Cathepsin L tr|D6X520|D6X520_TRICA). Similar to MCOT23301.0.CC XP_008480368.1. AED 0.25	GO:0006508	proteolysis	GO:0005622	intracellular	GO:0004197//GO:0008234//GO:0004198	cysteine-type endopeptidase activity//cysteine-type peptidase activity//calcium-dependent cysteine-type endopeptidase activity	K01373 cathepsin F [EC:3.4.22.41] | (RefSeq) Ctsf; cathepsin F	http://www.genome.jp/dbget-bin/www_bget?api:100158959	DcitrP077305.1	Cathepsin F-like protein 5-RA. (AHRD V3.11 *-* Cathepsin L tr|D6X520|D6X520_TRICA). Similar to MCOT23301.0.CC XP_008480368.1. AED 0.25
DcitrP074330.1	DcitrP074330.1	ScVcwli_3010:158955-190406	0.0833767	0	9.1553	0.000598707	0.0340309	>DcitrP074330.1.1 c-Myc-binding protein (AHRD V3.11 *-* tr|A0A195BA23|A0A195BA23_9HYME). Similar to MCOT19522.0.CC XP_008474182.1. AED 0.15	--	--	--	--	--	--	no KO assigned | (RefSeq) uncharacterized LOC100572267	http://www.genome.jp/dbget-bin/www_bget?api:100572267	DcitrP074330.1	c-Myc-binding protein (AHRD V3.11 *-* tr|A0A195BA23|A0A195BA23_9HYME). Similar to MCOT19522.0.CC XP_008474182.1. AED 0.15
DcitrP051680.1	DcitrP051680.1	ScVcwli_2151:468620-486624	0.146636	0	9.1192	2.35201e-05	0.00307995	Unknown protein. AED 0.66	GO:0030001//GO:0055085//GO:0006874	metal ion transport//transmembrane transport//cellular calcium ion homeostasis	GO:0016021//GO:0016020	integral component of membrane//membrane	GO:0046873//GO:0046872//GO:0005219//GO:0004190	metal ion transmembrane transporter activity//metal ion binding//ryanodine-sensitive calcium-release channel activity//aspartic-type endopeptidase activity	--	--	DcitrP051680.1	Unknown protein. AED 0.66
XLOC_011558	XLOC_011558	ScVcwli_2296:14119-23211	0.280165	0	9.10618	4.65575e-05	0.00520689		--	--	--	--	--	--	--	--	--	--
DcitrP006905.1	DcitrP006905.1	ScVcwli_325:161045-175910	0.171038	0	9.07023	0.000693918	0.0383881	>DcitrP006905.1.1 F-box/LRR-repeat protein 16 (AHRD V3.11 *-* tr|E2BRQ6|E2BRQ6_HARSA).	GO:0006614	SRP-dependent cotranslational protein targeting to membrane	GO:0048500	signal recognition particle	GO:0005509//GO:0005515//GO:0008312	calcium ion binding//protein binding//7S RNA binding	K10282 F-box and leucine-rich repeat protein 16 | (RefSeq) F-box/LRR-repeat protein 16	http://www.genome.jp/dbget-bin/www_bget?api:100165940	DcitrP006905.1	F-box/LRR-repeat protein 16 (AHRD V3.11 *-* tr|E2BRQ6|E2BRQ6_HARSA). AED 0.65
XLOC_007996	XLOC_007996	ScVcwli_1892:1019248-1028686	0.241724	0	8.93868	0.000975096	0.0496915		--	--	--	--	--	--	--	--	--	--
DcitrP078710.1	DcitrP078710.1	ScVcwli_3229:431-11150	0.213068	0	8.92638	0.000980064	0.0498219	>DcitrP078710.1.1 PAN2-PAN3 deadenylation complex catalytic subunit PAN2 (AHRD V3.11 *** tr|A0A1B6CJM8|A0A1B6CJM8_9HEMI). Similar to MCOT16836.0.CT. AED 0.00	GO:0006139//GO:0016579	nucleobase-containing compound metabolic process//protein deubiquitination	--	--	GO:0008408//GO:0003676//GO:0036459	3'-5' exonuclease activity//nucleic acid binding//ubiquitinyl hydrolase activity	K12571 PAB-dependent poly(A)-specific ribonuclease subunit 2 [EC:3.1.13.4] | (RefSeq) PAB-dependent poly(A)-specific ribonuclease subunit PAN2	http://www.genome.jp/dbget-bin/www_bget?api:100163386	DcitrP078710.1	PAN2-PAN3 deadenylation complex catalytic subunit PAN2 (AHRD V3.11 *** tr|A0A1B6CJM8|A0A1B6CJM8_9HEMI). Similar to MCOT16836.0.CT. AED 0.00||PAN2-PAN3 deadenylation complex catalytic subunit PAN2 (AHRD V3.11 *** tr|A0A1B6CJM8|A0A1B6CJM8_9HEMI). Similar to MCOT13458.2.CO. AED 0.00
DcitrP101175.1	DcitrP101175.1	ScVcwli_3633:219363-255664	0.062896	0	8.8918	6.69836e-07	0.000177678	>DcitrP101175.1.1 Protein numb (AHRD V3.11 *-* tr|A0A2A3EGE5|A0A2A3EGE5_APICC). Similar to MCOT15383.2.CO. AED 0.11	--	--	--	--	GO:0005515	protein binding	K06057 numb | (RefSeq) protein numb	http://www.genome.jp/dbget-bin/www_bget?api:100161079	DcitrP101175.1	Protein numb (AHRD V3.11 *-* tr|A0A2A3EGE5|A0A2A3EGE5_APICC). Similar to MCOT15383.2.CO. AED 0.11
XLOC_021439	XLOC_021439	ScVcwli_3370:311163-317771	0.344832	0	8.87224	1.01471e-06	0.00025919		--	--	--	--	--	--	--	--	--	--
XLOC_029631	XLOC_029631	ScVcwli_483:616908-618621	1.15549	0	8.69607	0.000322186	0.0230659		--	--	--	--	--	--	--	--	--	--
DcitrP034300.1	DcitrP034300.1	ScVcwli_1303:30541-58372	0.0739535	0	8.68567	0.000426875	0.0280382	>DcitrP034300.1.1 Neurobeachin (AHRD V3.11 *-* tr|W8AUJ2|W8AUJ2_CERCA). AED 0.49	--	--	--	--	--	--	--	--	DcitrP034300.1	Neurobeachin (AHRD V3.11 *-* tr|W8AUJ2|W8AUJ2_CERCA). AED 0.49
DcitrP092665.1	DcitrP092665.1	ScVcwli_3499:411044-421743	0.170455	0	8.62966	0.000210094	0.0167832	>DcitrP092665.1.1 Ankyrin repeat domain-containing protein SOWAHB (AHRD V3.11 *-* tr|A0A154P8Y6|A0A154P8Y6_9HYME). AED 0.78	--	--	--	--	--	--	no KO assigned | (RefSeq) ankyrin repeat domain-containing protein SOWAHC	http://www.genome.jp/dbget-bin/www_bget?api:100573723	DcitrP092665.1	Ankyrin repeat domain-containing protein SOWAHB (AHRD V3.11 *-* tr|A0A154P8Y6|A0A154P8Y6_9HYME). AED 0.78
DcitrP082815.1	DcitrP082815.1	ScVcwli_3360:67944-102633	0.0530002	0	8.57675	4.96947e-06	0.000934713	>DcitrP082815.1.1 Protein Skeletor, isoforms B/C-like Protein (AHRD V3.11 *** tr|D6X0N5|D6X0N5_TRICA). Similar to MCOT23173.2.CO. AED 0.22	--	--	--	--	--	--	no KO assigned | (RefSeq) protein Skeletor, isoforms B/C	http://www.genome.jp/dbget-bin/www_bget?api:100160004	DcitrP082815.1	Protein Skeletor, isoforms B/C-like Protein (AHRD V3.11 *** tr|D6X0N5|D6X0N5_TRICA). Similar to MCOT23173.2.CO. AED 0.22
XLOC_020191	XLOC_020191	ScVcwli_331:105848-108073	0.770736	0	8.55577	4.17499e-06	0.000838646		--	--	--	--	--	--	--	--	--	--
XLOC_014962	XLOC_014962	ScVcwli_2646:114929-121896	0.261004	0	8.53182	0.000262928	0.0199766		--	--	--	--	--	--	--	--	--	--
DcitrP069390.1	DcitrP069390.1	ScVcwli_2784:58150-77609	0.0902208	0	8.53093	0.000302728	0.0223694	>DcitrP069390.1.1 Membrane metallo-endopeptidase-like 1 (AHRD V3.11 *** tr|A0A0L7R038|A0A0L7R038_9HYME). Similar to MCOT02129.1	GO:0006508	proteolysis	--	--	--	--	no KO assigned | (RefSeq) neprilysin-11	http://www.genome.jp/dbget-bin/www_bget?api:100159184	DcitrP069390.1	Membrane metallo-endopeptidase-like 1 (AHRD V3.11 *** tr|A0A0L7R038|A0A0L7R038_9HYME). Similar to MCOT02129.1.CO. AED 0.03
DcitrP069980.1	DcitrP069980.1	ScVcwli_2811:27449-47828	0.086196	0	8.52587	0.000306781	0.022498	>DcitrP069980.1.1 Receptor protein-tyrosine kinase (AHRD V3.11 *-* tr|J9K821|J9K821_ACYPI). Similar to MCOT12273.0.CO. AED 0.01	GO:0006468//GO:0007169	protein phosphorylation//transmembrane receptor protein tyrosine kinase signaling pathway	GO:0016020	membrane	GO:0005524//GO:0004714	ATP binding//transmembrane receptor protein tyrosine kinase activity	K04361 epidermal growth factor receptor [EC:2.7.10.1] | (RefSeq) epidermal growth factor receptor	http://www.genome.jp/dbget-bin/www_bget?api:100168353	DcitrP069980.1	Receptor protein-tyrosine kinase (AHRD V3.11 *-* tr|J9K821|J9K821_ACYPI). Similar to MCOT12273.0.CO. AED 0.01
DcitrP056775.1	DcitrP056775.1	ScVcwli_2275:543852-549939	0.265205	0	8.44321	0.000274049	0.0206937	>DcitrP056775.1.1 Tyrosine protein kinase receptor torso-RA. (AHRD V3.11 *** Tyrosine kinase receptor, putative tr|E0W2Q2|E0W2Q2_PEDHC).	GO:0006468	protein phosphorylation	--	--	GO:0004672//GO:0005524	protein kinase activity//ATP binding	no KO assigned | (RefSeq) tyrosine kinase receptor Cad96Ca	http://www.genome.jp/dbget-bin/www_bget?api:100164198	DcitrP056775.1	Tyrosine protein kinase receptor torso-RA. (AHRD V3.11 *** Tyrosine kinase receptor, putative tr|E0W2Q2|E0W2Q2_PEDHC). AED 0.48
XLOC_008913	XLOC_008913	ScVcwli_2008:456262-457903	0.968077	0	8.41948	0.000361523	0.0251647		--	--	--	--	--	--	--	--	--	--
DcitrP079135.1	DcitrP079135.1	ScVcwli_3264:831098-847545	0.0923703	0	8.36312	0.000362438	0.0251647	>DcitrP079135.1.1 Retrovirus-related Pol polyprotein from transposon 17.6 (AHRD V3.11 *-* tr|V5I839|V5I839_ANOGL). AED 0.44	GO:0015074//GO:0055114//GO:0022900	DNA integration//oxidation-reduction process//electron transport chain	GO:0016021	integral component of membrane	GO:0008827	cytochrome o ubiquinol oxidase activity	no KO assigned | (RefSeq) uncharacterized protein K02A2.6-like	http://www.genome.jp/dbget-bin/www_bget?api:103310703	DcitrP079135.1	Retrovirus-related Pol polyprotein from transposon 17.6 (AHRD V3.11 *-* tr|V5I839|V5I839_ANOGL). AED 0.44
DcitrP008265.1	DcitrP008265.1	ScVcwli_370:352651-363660	0.136271	0	8.36208	1.18504e-05	0.00184349	>DcitrP008265.1.1 Threonine--tRNA ligase	--	--	--	--	--	--	no KO assigned | (RefSeq) uncharacterized LOC100569590	http://www.genome.jp/dbget-bin/www_bget?api:100569590	DcitrP008265.1	Threonine--tRNA ligase (AHRD V3.11 *-* tr|A0A0A9YZV6|A0A0A9YZV6_LYGHE). AED 0.12
XLOC_025153	XLOC_025153	ScVcwli_3518:511149-518256	0.2133	0	8.33943	0.000550575	0.0326212		--	--	--	--	--	--	--	--	--	--
DcitrP075535.1	DcitrP075535.1	ScVcwli_3105:28081-66211	0.0375443	0	8.26358	0.000591201	0.0338835	>DcitrP075535.1.1 Reverse transcriptase, putative (AHRD V3.11 *-* tr|E0W0H3|E0W0H3_PEDHC). AED 0.34| InterPro:IPR000477,Pfam:PF00078	--	--	--	--	--	--	--	--	DcitrP075535.1	Reverse transcriptase, putative (AHRD V3.11 *-* tr|E0W0H3|E0W0H3_PEDHC). AED 0.34
DcitrP087210.1	DcitrP087210.1	ScVcwli_3439:38743-59887	0.0650358	0	8.25466	0.000576762	0.0337093	>DcitrP087210.1.1 Transcription factor MafA (AHRD V3.11 *-* tr|E2A807|E2A807_CAMFO). AED 0.71	GO:0007049//GO:0006355	cell cycle//regulation of transcription, DNA-templated	GO:0005634	nucleus	GO:0017111//GO:0003700//GO:0043565//GO:0003677	nucleoside-triphosphatase activity//transcription factor activity, sequence-specific DNA binding//sequence-specific DNA binding//DNA binding	no KO assigned | (RefSeq) alpha-protein kinase 1-like	http://www.genome.jp/dbget-bin/www_bget?api:100159989	DcitrP087210.1	Transcription factor MafA (AHRD V3.11 *-* tr|E2A807|E2A807_CAMFO). AED 0.71
DcitrP059575.1	DcitrP059575.1	ScVcwli_2435:79262-93083	0.105172	0	8.24036	0.00055341	0.0326212	Unknown protein	GO:0005975	carbohydrate metabolic process	--	--	GO:0016773	phosphotransferase activity, alcohol group as acceptor	K00864 glycerol kinase [EC:2.7.1.30] | (RefSeq) glycerol kinase	http://www.genome.jp/dbget-bin/www_bget?api:100164331	DcitrP059575.1	Unknown protein. AED 0.85
DcitrP078385.1	DcitrP078385.1	ScVcwli_3213:54332-80322	0.0578225	0	8.23938	0.00077781	0.0416914	DcitrP078385.1.1 MDM2 protein (AHRD V3.11 *-* tr|A0A0C9RFT5|A0A0C9RFT5_9HYME). Similar to MCOT06299.0.CC XP_008471211.1. AED 0.00	--	--	--	--	--	--	no KO assigned | (RefSeq) protein Mdm4	http://www.genome.jp/dbget-bin/www_bget?api:100162540	DcitrP078385.1	MDM2 protein (AHRD V3.11 *-* tr|A0A0C9RFT5|A0A0C9RFT5_9HYME). Similar to MCOT06299.0.CC XP_008471211.1. AED 0.00
DcitrP033980.1	DcitrP033980.1	ScVcwli_1288:14225-31565	0.0741108	0	8.11671	3.24883e-05	0.00386312	>DcitrP033980.1.1 Multiple epidermal growth factor-like domains 10 (AHRD V3.11 *-* tr|F4WTV2|F4WTV2_ACREC). AED 0.35	--	--	--	--	GO:0003993//GO:0005515//GO:0046872	acid phosphatase activity//protein binding//metal ion binding	K05121 endothelial-specific receptor tyrosine kinase [EC:2.7.10.1] | (RefSeq) uncharacterized LOC100167115	http://www.genome.jp/dbget-bin/www_bget?api:100167115	DcitrP033980.1	Multiple epidermal growth factor-like domains 10 (AHRD V3.11 *-* tr|F4WTV2|F4WTV2_ACREC). AED 0.35
DcitrP029815.1	DcitrP029815.1	ScVcwli_1123:1831901-1852368	0.0618153	0	8.0978	6.0896e-05	0.00663125	Unknown protein.	GO:0006412	translation	GO:0005840	ribosome	GO:0003735	structural constituent of ribosome	--	--	DcitrP029815.1	Unknown protein. AED 0.22
DcitrP076995.1	DcitrP076995.1	ScVcwli_3144:19858-30258	0.123441	0	8.09135	3.90633e-05	0.00454056	>DcitrP076995.1.1 UDP-glucose 4-epimerase (AHRD V3.11 *** tr|A0A067QWG7|A0A067QWG7_ZOONE). AED 0.04| InterPro	GO:0055114//GO:0008152//GO:0006694	oxidation-reduction process//metabolic process//steroid biosynthetic process	--	--	GO:0016491//GO:0003854//GO:0050662//GO:0003824//GO:0016616	oxidoreductase activity//3-beta-hydroxy-delta5-steroid dehydrogenase activity//coenzyme binding//catalytic activity//oxidoreductase activity, acting on the CH-OH group of donors, NAD or NADP as acceptor	K01784 UDP-glucose 4-epimerase [EC:5.1.3.2] | (RefSeq) UDP-glucose 4-epimerase-like	http://www.genome.jp/dbget-bin/www_bget?api:100163895	DcitrP076995.1	UDP-glucose 4-epimerase (AHRD V3.11 *** tr|A0A067QWG7|A0A067QWG7_ZOONE). AED 0.04
DcitrP082300.1	DcitrP082300.1	ScVcwli_3342:717981-732154	0.08172	0	7.94944	7.38242e-05	0.00752425	Unknown protein	GO:0030261//GO:0006508	chromosome condensation//proteolysis	--	--	GO:0008233//GO:0003677	peptidase activity//DNA binding	K20703 FAS-associated factor 1 | (RefSeq) FAS-associated factor 1	http://www.genome.jp/dbget-bin/www_bget?api:100169528	DcitrP082300.1	Unknown protein. AED 0.89
XLOC_012379	XLOC_012379	ScVcwli_24:167582-169367	0.656682	0	7.92187	0.000237823	0.0185741		--	--	--	--	--	--	--	--	--	--
DcitrP050970.1	DcitrP050970.1	ScVcwli_2098:111496-113321	0.558247	0	7.80053	0.000132686	0.0117319	DcitrP050970.1.1 Unknown protein. Similar to MCOT13146.0.CC XP_017302138.1. AED 0.00	--	--	--	--	--	--	--	--	DcitrP050970.1	Unknown protein. Similar to MCOT13146.0.CC XP_017302138.1. AED 0.00
DcitrP084155.1	DcitrP084155.1	ScVcwli_3379:57494-61540	0.230467	0	7.65681	0.00027762	0.0208871	>DcitrP084155.1.1 UDP-glucuronosyltransferase (AHRD V3.11 *** tr|L7WMY4|L7WMY4_LOCMI). Similar to MCOT06579.0.CO. AED 0.22| InterPro:IPR002213,Pfam:PF00201| GO:0008152,GO:0016758	GO:0008152	metabolic process	GO:0005739//GO:0016021	mitochondrion//integral component of membrane	GO:0016758//GO:0016820	transferase activity, transferring hexosyl groups//hydrolase activity, acting on acid anhydrides, catalyzing transmembrane movement of substances	K00699 glucuronosyltransferase [EC:2.4.1.17] | (RefSeq) UDP-glucuronosyltransferase 2B15-like	http://www.genome.jp/dbget-bin/www_bget?api:100168108	DcitrP084155.1	UDP-glucuronosyltransferase (AHRD V3.11 *** tr|L7WMY4|L7WMY4_LOCMI). Similar to MCOT06579.0.CO. AED 0.22
DcitrP062730.1	DcitrP062730.1	ScVcwli_2522:1040674-1050577	0.0905515	0	7.57336	0.000318447	0.0228773	>DcitrP062730.1.1 Broad-complex core protein isoform 6 (AHRD V3.11 *** tr|A0A0L7QNC1|A0A0L7QNC1_9HYME). Similar to MCOT19714.0.CO XP_017297939.1. AED 0.21	--	--	--	--	--	--	no KO assigned | (RefSeq) uncharacterized LOC100572239	http://www.genome.jp/dbget-bin/www_bget?api:100572239	DcitrP062730.1	Broad-complex core protein isoform 6 (AHRD V3.11 *** tr|A0A0L7QNC1|A0A0L7QNC1_9HYME). Similar to MCOT19714.0.CO XP_017297939.1. AED 0.21
DcitrP056165.1	DcitrP056165.1	ScVcwli_2263:172483-184836	0.0690525	0	7.49959	0.000360303	0.0251647	>DcitrP056165.1.1 Sas protein (AHRD V3.11 *-* tr|A0A0C9QK87|A0A0C9QK87_9HYME). Similar to MCOT06505.2.CT. AED 0.03	GO:0006355	regulation of transcription, DNA-templated	GO:0042025	host cell nucleus	GO:0046872//GO:0005515//GO:0003700//GO:0003993	metal ion binding//protein binding//transcription factor activity, sequence-specific DNA binding//acid phosphatase activity	--	--	DcitrP056165.1	Sas protein (AHRD V3.11 *-* tr|A0A0C9QK87|A0A0C9QK87_9HYME). Similar to MCOT13442.0.CT. AED 0.00||Sas protein (AHRD V3.11 *-* tr|A0A0C9QK87|A0A0C9QK87_9HYME). Similar to MCOT06505.2.CT. AED 0.00||Sas protein (AHRD V3.11 *-* tr|A0A0C9QK87|A0A0C9QK87_9HYME). Similar to MCOT06505.2.CT. AED 0.03||Sas protein (AHRD V3.11 *-* tr|A0A0C9QK87|A0A0C9QK87_9HYME). Similar to MCOT06505.2.CT. AED 0.06
DcitrP009295.1	DcitrP009295.1	ScVcwli_420:63491-94827	0.0255252	0	7.437	0.000452663	0.0287318	>DcitrP009295.1.1 dual oxidase maturation factor 1	GO:0042710//GO:0015031	biofilm formation//protein transport	GO:0005789//GO:0016021	endoplasmic reticulum membrane//integral component of membrane	--	--	K17233 dual oxidase maturation factor 1 | (RefSeq) dual oxidase maturation factor 1	http://www.genome.jp/dbget-bin/www_bget?api:100161886	DcitrP009295.1	dual oxidase maturation factor 1 (AHRD V3.11 *** tr|A0A1W4WBR5|A0A1W4WBR5_DROFC). AED 0.09
XLOC_021051	XLOC_021051	ScVcwli_3349:768614-769558	0.760316	0	7.29066	0.000764685	0.0412014		--	--	--	--	--	--	--	--	--	--
DcitrP076500.1	DcitrP076500.1	ScVcwli_3132:135133-144075	0.729783	0.015359	6.01553	3.11373e-07	9.07367e-05	>DcitrP076500.1.1 Nidogen-1 (AHRD V3.11 *** tr|A0A2A3EIC9|A0A2A3EIC9_APICC). Similar to MCOT22800.0.CT. AED 0.02	--	--	--	--	GO:0005515	protein binding	K06826 nidogen (entactin) | (RefSeq) nidogen-2	http://www.genome.jp/dbget-bin/www_bget?api:103310328	DcitrP076500.1	Nidogen-1 (AHRD V3.11 *** tr|A0A2A3EIC9|A0A2A3EIC9_APICC). Similar to MCOT22800.0.CT. AED 0.02
XLOC_019825	XLOC_019825	ScVcwli_3294:232997-255522	0.57104	0.0275202	4.89893	0.000406507	0.026871		--	--	--	--	--	--	--	--	--	--
DcitrP080835.1	DcitrP080835.1	ScVcwli_3313:140969-152073	2.02343	0.156416	4.2137	0.000163371	0.0138531	DcitrP080835.1.1 39S ribosomal protein L53, mitochondrial (AHRD V3.11 *-* tr|A0A0A9XM32|A0A0A9XM32_LYGHE). AED 0.62	--	--	--	--	--	--	K17434 large subunit ribosomal protein L53 | (RefSeq) Mrpl53; 39S ribosomal protein L53, mitochondrial	http://www.genome.jp/dbget-bin/www_bget?api:100164231	DcitrP080835.1	39S ribosomal protein L53, mitochondrial (AHRD V3.11 *-* tr|A0A0A9XM32|A0A0A9XM32_LYGHE). AED 0.62
DcitrP008700.1	DcitrP008700.1	ScVcwli_395:129234-130401	27.7478	2.87118	3.75007	1.27922e-13	3.30838e-10	Unknown protein	--	--	--	--	--	--	--	--	DcitrP008700.1	Unknown protein. AED 0.00
DcitrP093430.1	DcitrP093430.1	ScVcwli_3508:104013-105184	43.32	4.70666	3.71179	6.38833e-15	2.20291e-11	>DcitrP093430.1.1 Ribosomal protein L27A (AHRD V3.11 *** tr|D1M817|D1M817_CHRTR). Similar to MCOT21225.0.CT XP_017303718.1	--	--	--	--	--	--	K02900 large subunit ribosomal protein L27Ae | (RefSeq) Rpl27a; ribosomal protein L27a	http://www.genome.jp/dbget-bin/www_bget?api:100166296	DcitrP093430.1	Ribosomal protein L27A (AHRD V3.11 *** tr|D1M817|D1M817_CHRTR). Similar to MCOT21225.0.CT XP_017303718.1. AED 0.31
DcitrP014755.1	DcitrP014755.1	ScVcwli_592:805836-812948	0.5591	0.0680002	3.56531	0.000607779	0.0343578	>DcitrP014755.1.1 ADP,ATP carrier protein-like-RA. (AHRD V3.11 *** Mitochondrial carrier protein tr|T1P932|T1P932_MUSDO). Similar to MCOT13165.3.CO. AED 0.09	--	--	GO:0019028	viral capsid	GO:0005198	structural molecule activity	no KO assigned | (RefSeq) solute carrier family 25 member 45-like	http://www.genome.jp/dbget-bin/www_bget?api:100575532	DcitrP014755.1	ADP,ATP carrier protein-like-RA. (AHRD V3.11 *** Mitochondrial carrier protein tr|T1P932|T1P932_MUSDO). Similar to MCOT13165.3.CO. AED 0.09
XLOC_007556	XLOC_007556	ScVcwli_1826:129468-131318	3.16476	0.447941	3.20232	1.26163e-05	0.00193356		--	--	--	--	--	--	--	--	--	--
DcitrP022120.1	DcitrP022120.1	ScVcwli_910:1967673-1983301	854.533	162.249	2.84887	4.29899e-12	8.08601e-09	Unknown protein	--	--	--	--	--	--	--	--	DcitrP022120.1	Unknown protein. AED 0.26
DcitrP049420.1	DcitrP049420.1	ScVcwli_2040:57235-61988	3.19642	0.60965	2.78705	3.48086e-06	0.000713059	Unknown protein.	GO:0008218	bioluminescence	--	--	GO:0047474	long-chain fatty acid luciferin component ligase activity	--	--	DcitrP049420.1	Unknown protein. Similar to MCOT03534.0.CO. AED 0.00
DcitrP011900.1	DcitrP011900.1	ScVcwli_493:13915-37603	5.12668	1.28331	2.58491	1.8558e-06	0.000426628	Ribonuclease UK114 (AHRD V3.11 *** tr|A0A067QY57|A0A067QY57_ZOONE). AED 0.28| InterPro:IPR006175,Pfam:PF01042	--	--	--	--	--	--	no KO assigned | (RefSeq) ribonuclease UK114-like	http://www.genome.jp/dbget-bin/www_bget?api:100160853	DcitrP011900.1	Ribonuclease UK114 (AHRD V3.11 *** tr|A0A067QY57|A0A067QY57_ZOONE). AED 0.28
DcitrP022115.1	DcitrP022115.1	ScVcwli_910:1957024-1965519	1636.62	357.091	2.5824	1.00551e-08	4.42638e-06	Unknown protein	--	--	--	--	--	--	--	--	DcitrP022115.1	Unknown protein. AED 0.26
DcitrP068670.1	DcitrP068670.1	ScVcwli_2743:513-3342	588.699	131.915	2.57625	9.45171e-11	1.1314e-07	Unknown protein	--	--	--	--	--	--	--	--	DcitrP068670.1	Unknown protein. Similar to XP_008479755.1. AED 0.01
DcitrP096350.1	DcitrP096350.1	ScVcwli_3541:366916-378464	3.56857	0.822579	2.55343	3.37382e-08	1.36871e-05	Unknown protein	GO:0008053	mitochondrial fusion	GO:0005741//GO:0016021	mitochondrial outer membrane//integral component of membrane	GO:0003924	GTPase activity	--	--	DcitrP096350.1	Unknown protein. AED 0.05
DcitrP100115.1	DcitrP100115.1	ScVcwli_3598:1438784-1442913	14.6159	3.52926	2.53091	8.83327e-07	0.000231342	Unknown protein. Similar to MCOT01569.0.CC. AED 0.11	--	--	--	--	--	--	--	--	DcitrP100115.1	Unknown protein. Similar to MCOT01569.0.CC. AED 0.11||Unknown protein. AED 0.09
DcitrP022420.1	DcitrP022420.1	ScVcwli_921:143001-151653	1.40508	0.342128	2.50458	4.17225e-05	0.00476928	Ornithine aminotransferase, mitochondrial (AHRD V3.11 *-* tr|B0WBA3|B0WBA3_CULQU). Similar to MCOT18578.0.CT. AED 0.10	GO:0009058	biosynthetic process	--	--	GO:0030170//GO:0008483	pyridoxal phosphate binding//transaminase activity	K00819 ornithine--oxo-acid transaminase [EC:2.6.1.13] | (RefSeq) ornithine aminotransferase, mitochondrial	http://www.genome.jp/dbget-bin/www_bget?api:100168809	DcitrP022420.1	Ornithine aminotransferase, mitochondrial (AHRD V3.11 *-* tr|B0WBA3|B0WBA3_CULQU). Similar to MCOT18578.0.CT. AED 0.10
DcitrP097360.1	DcitrP097360.1	ScVcwli_3559:372005-374625	4.49432	1.47045	2.14293	0.000157248	0.0134441	DcitrP097360.1.1 Facilitated trehalose transporter Tret1-like protein-RA. (AHRD V3.11 *** Facilitated trehalose transporter Tret1 tr	GO:0055085	transmembrane transport	GO:0016021	integral component of membrane	GO:0022857	transmembrane transporter activity	K08145 MFS transporter, SP family, solute carrier family 2 (facilitated glucose transporter), member 8 | (RefSeq) facilitated trehalose transporter Tret1-like	http://www.genome.jp/dbget-bin/www_bget?api:100169115	DcitrP097360.1	Facilitated trehalose transporter Tret1-like protein-RA. (AHRD V3.11 *** Facilitated trehalose transporter Tret1 tr|A0A0A9XML7|A0A0A9XML7_LYGHE). Similar to MCOT20123.1.CC XP_008472831.2. AED 0.00
DcitrP038140.1	DcitrP038140.1	ScVcwli_1495:28555-43934	0.965884	0.324184	2.05058	1.45907e-05	0.002141	>DcitrP038140.1.1 UDP-glucuronosyltransferase (AHRD V3.11 *** tr|A0A067RG77|A0A067RG77_ZOONE). AED 0.25| InterPro	GO:0008152	metabolic process	--	--	GO:0016758	transferase activity, transferring hexosyl groups	K00699 glucuronosyltransferase [EC:2.4.1.17] | (RefSeq) UDP-glucuronosyltransferase 2C1	http://www.genome.jp/dbget-bin/www_bget?api:100163870	DcitrP038140.1	UDP-glucuronosyltransferase (AHRD V3.11 *** tr|A0A067RG77|A0A067RG77_ZOONE). AED 0.25
XLOC_003731	XLOC_003731	ScVcwli_1326:158440-164940	3.00692	1.00276	1.99871	0.000533164	0.0322549		--	--	--	--	--	--	--	--	--	--
DcitrP048145.1	DcitrP048145.1	ScVcwli_1951:2199687-2218519	1.06136	0.403477	1.94354	0.000777167	0.0416914	>DcitrP048145.1.1 Phosphotransferase (AHRD V3.11 *** tr	GO:0005975	carbohydrate metabolic process	--	--	GO:0016773//GO:0005524//GO:0005515	phosphotransferase activity, alcohol group as acceptor//ATP binding//protein binding	K00844 hexokinase [EC:2.7.1.1] | (RefSeq) hexokinase type 2	http://www.genome.jp/dbget-bin/www_bget?api:100169524	DcitrP048145.1	Phosphotransferase (AHRD V3.11 *** tr|A0A1S6KW35|A0A1S6KW35_NILLU). AED 0.06
XLOC_002290	XLOC_002290	ScVcwli_1161:99797-110819	16.2619	6.3723	1.90508	8.02635e-05	0.00804565		--	--	--	--	--	--	--	--	--	--
DcitrP092210.1	DcitrP092210.1	ScVcwli_3489:2659025-2665060	3.21329	1.25504	1.90386	0.00047353	0.0296889	>DcitrP092210.1.1 vitamin e uncharacterized protein -RA. (AHRD V3.11 *** Alpha-tocopherol transfer protein tr|A0A212FBP0|A0A212FBP0_DANPL). Similar to MCOT00589.2.CT. AED 0.01	--	--	--	--	--	--	no KO assigned | (RefSeq) alpha-tocopherol transfer protein-like	http://www.genome.jp/dbget-bin/www_bget?api:100158845	DcitrP092210.1	vitamin e uncharacterized protein -RA. (AHRD V3.11 *** Alpha-tocopherol transfer protein tr|A0A212FBP0|A0A212FBP0_DANPL). Similar to MCOT00589.2.CT. AED 0.01
DcitrP030465.1	DcitrP030465.1	ScVcwli_1137:157428-158343	45.3512	18.6342	1.89285	0.00045271	0.0287318	Unknown protein. Similar to XP_008484331.1. AED 0.03	--	--	--	--	GO:0004869	cysteine-type endopeptidase inhibitor activity	--	--	DcitrP030465.1	Unknown protein. Similar to XP_008484331.1. AED 0.03
DcitrP009135.1	DcitrP009135.1	ScVcwli_414:12977-16971	30.873	12.2049	1.8479	3.3411e-07	9.60102e-05	DcitrP009135.1.1 peroxidase like-RA. (AHRD V3.11 *** Peroxidase tr|V9IAE9|V9IAE9_APICE). Similar to MCOT20004.0.CO.	--	--	--	--	--	--	no KO assigned | (RefSeq) peroxidase	http://www.genome.jp/dbget-bin/www_bget?api:100164771	DcitrP009135.1	peroxidase like-RA. (AHRD V3.11 *** Peroxidase tr|V9IAE9|V9IAE9_APICE). Similar to MCOT20004.0.CO. AED 0.00
XLOC_034747	XLOC_034747	ScVcwli_982:484844-490599	18.0665	7.33743	1.80695	2.92493e-07	8.64524e-05		--	--	--	--	--	--	--	--	--	--
XLOC_005425	XLOC_005425	ScVcwli_1570:5310-9406	13.1661	5.67191	1.7798	1.83272e-05	0.0025621		--	--	--	--	--	--	--	--	--	--
DcitrP019570.1	DcitrP019570.1	ScVcwli_834:160823-163950	562.078	239.328	1.77362	1.46518e-07	4.96959e-05	Glutathione S-transferase (AHRD V3.11 *** tr|T1PG87|T1PG87_MUSDO). Similar to MCOT20027.1.CC XP_017301050.1. AED 0.10	GO:0045454	cell redox homeostasis	--	--	GO:0005515//GO:0015035//GO:0009055	protein binding//protein disulfide oxidoreductase activity//electron carrier activity	K00799 glutathione S-transferase [EC:2.5.1.18] | (RefSeq) glutathione S-transferase	http://www.genome.jp/dbget-bin/www_bget?api:100167906	DcitrP019570.1	Glutathione S-transferase (AHRD V3.11 *** tr|T1PG87|T1PG87_MUSDO). Similar to MCOT20027.1.CC XP_017301050.1. AED 0.10
DcitrP088040.1	DcitrP088040.1	ScVcwli_3444:1677607-1687718	228.366	99.1776	1.75994	3.58149e-06	0.000726481	>DcitrP088040.1.1 Chemosensory protein 3	--	--	--	--	--	--	no KO assigned | (RefSeq) ejaculatory bulb-specific protein 3-like	http://www.genome.jp/dbget-bin/www_bget?api:100168412	DcitrP088040.1	Chemosensory protein 3 (AHRD V3.11 *-* tr|A0A097GUD6|A0A097GUD6_BEMTA). AED 0.43
DcitrP045045.1	DcitrP045045.1	ScVcwli_1840:16701-20053	125.933	51.7994	1.7435	1.90885e-07	6.076e-05	>DcitrP045045.1.1 Apolipoprotein D (AHRD V3.11 *** tr|A0A067R6A5|A0A067R6A5_ZOONE). Similar to MCOT03666.0.CO. AED 0.24	GO:0030682	evasion or tolerance of host defense response	--	--	GO:0008083	growth factor activity	no KO assigned | (RefSeq) apolipoprotein D	http://www.genome.jp/dbget-bin/www_bget?api:100161983	DcitrP045045.1	Apolipoprotein D (AHRD V3.11 *** tr|A0A067R6A5|A0A067R6A5_ZOONE). Similar to MCOT03666.0.CO. AED 0.24
DcitrP010180.1	DcitrP010180.1	ScVcwli_439:954939-957089	8.70852	3.78717	1.71975	0.00036245	0.0251647	Unknown protein	GO:0019064	fusion of virus membrane with host plasma membrane	GO:0016020	membrane	GO:0003677	DNA binding	--	--	DcitrP010180.1	Unknown protein. AED 0.09
DcitrP041675.1	DcitrP041675.1	ScVcwli_1663:44849-64451	4.13098	1.80316	1.70883	2.40031e-05	0.00311442	>DcitrP041675.1.1 Isocitrate dehydrogenase [NADP] (AHRD V3.11 *-* tr|R4WRJ5|R4WRJ5_RIPPE). Similar to MCOT16976.0.CO. AED 0.13	GO:0055114	oxidation-reduction process	--	--	GO:0016616	oxidoreductase activity, acting on the CH-OH group of donors, NAD or NADP as acceptor	K00031 isocitrate dehydrogenase [EC:1.1.1.42] | (RefSeq) isocitrate dehydrogenase [NADP] cytoplasmic	http://www.genome.jp/dbget-bin/www_bget?api:100167396	DcitrP041675.1	Isocitrate dehydrogenase [NADP] (AHRD V3.11 *-* tr|R4WRJ5|R4WRJ5_RIPPE). Similar to MCOT16976.0.CO. AED 0.13||Isocitrate dehydrogenase [NADP] (AHRD V3.11 *-* tr|R4WRJ5|R4WRJ5_RIPPE). Similar to MCOT16976.0.CO. AED 0.10
DcitrP087130.1	DcitrP087130.1	ScVcwli_3435:92451-149796	4.6267	1.99012	1.67669	8.36804e-05	0.00832379	>DcitrP087130.1.1 Neurotrimin-like Protein	--	--	--	--	GO:0005515	protein binding	no KO assigned | (RefSeq) uncharacterized LOC100166138	http://www.genome.jp/dbget-bin/www_bget?api:100166138	DcitrP087130.1	Neurotrimin-like Protein (AHRD V3.11 *** tr|A0A139WML4|A0A139WML4_TRICA). AED 0.10
DcitrP041665.1	DcitrP041665.1	ScVcwli_1663:137520-156338	3.48403	1.60436	1.64828	1.33869e-05	0.00202172	>DcitrP041665.1.2 Isocitrate dehydrogenase [NADP] (AHRD V3.11 *** tr|R4WRJ5|R4WRJ5_RIPPE). Similar to MCOT16976.0.CO XP_008481246.1.	GO:0055114	oxidation-reduction process	--	--	GO:0016616	oxidoreductase activity, acting on the CH-OH group of donors, NAD or NADP as acceptor	K00031 isocitrate dehydrogenase [EC:1.1.1.42] | (RefSeq) isocitrate dehydrogenase [NADP] cytoplasmic	http://www.genome.jp/dbget-bin/www_bget?api:100167396	DcitrP041665.1	Isocitrate dehydrogenase [NADP] (AHRD V3.11 *** tr|S4PG03|S4PG03_9NEOP). Similar to MCOT16976.0.CO XP_008481246.1. AED 0.04||Isocitrate dehydrogenase [NADP] (AHRD V3.11 *** tr|R4WRJ5|R4WRJ5_RIPPE). Similar to MCOT16976.0.CO XP_008481246.1. AED 0.06
DcitrP053520.1	DcitrP053520.1	ScVcwli_2175:2035682-2042737	33.8176	15.7861	1.60735	2.44086e-06	0.000535382	>DcitrP053520.1.1 peroxidase like-RA. (AHRD V3.11 *** Peroxidase tr|A0A067RJX3|A0A067RJX3_ZOONE). Similar to MCOT20004.0.CO. AED 0.01| InterPro:IPR019791,Pfam:PF03098	GO:0006355	regulation of transcription, DNA-templated	GO:0005634	nucleus	GO:0016818//GO:0003677//GO:0008270//GO:0005524	hydrolase activity, acting on acid anhydrides, in phosphorus-containing anhydrides//DNA binding//zinc ion binding//ATP binding	no KO assigned | (RefSeq) peroxidase	http://www.genome.jp/dbget-bin/www_bget?api:100164771	DcitrP053520.1	peroxidase like-RA. (AHRD V3.11 *** Peroxidase tr|A0A067RJX3|A0A067RJX3_ZOONE). Similar to MCOT20004.0.CO. AED 0.01
DcitrP056755.1	DcitrP056755.1	ScVcwli_2275:696624-780753	0.511836	0.229994	1.60183	0.000794841	0.0423847	>DcitrP056755.1.1 Tyrosine protein kinase receptor torso-RA. (AHRD V3.11 *** Tyrosine kinase receptor, putative tr|E0W2Q2|E0W2Q2_PEDHC). Similar to MCOT00988.1.CO XP_017300923.1. AED 0.33	GO:0007156//GO:0006468	homophilic cell adhesion via plasma membrane adhesion molecules//protein phosphorylation	GO:0016020	membrane	GO:0005524//GO:0004672//GO:0005509	ATP binding//protein kinase activity//calcium ion binding	no KO assigned | (RefSeq) tyrosine kinase receptor Cad96Ca	http://www.genome.jp/dbget-bin/www_bget?api:100164198	DcitrP056755.1	Tyrosine protein kinase receptor torso-RB. (AHRD V3.11 *** Tyrosine kinase receptor, putative tr|E0W2Q2|E0W2Q2_PEDHC). Similar to MCOT00988.1.CO XP_017300923.1. AED 0.33||Tyrosine protein kinase receptor torso-RA. (AHRD V3.11 *** Tyrosine kinase receptor, putative tr|E0W2Q2|E0W2Q2_PEDHC). Similar to MCOT00988.1.CO XP_017300923.1. AED 0.33
DcitrP030425.1	DcitrP030425.1	ScVcwli_1137:335417-336456	28.1543	13.8957	1.5718	0.000144564	0.0126204	Unknown protein. Similar to MCOT21158.0.CO. AED 0.31	--	--	--	--	GO:0004869	cysteine-type endopeptidase inhibitor activity	--	--	DcitrP030425.1	Unknown protein. Similar to MCOT21158.0.CO. AED 0.31
DcitrP020605.1	DcitrP020605.1	ScVcwli_858:2463694-2467007	445.498	220.342	1.54997	1.84084e-06	0.000426628	>DcitrP020605.1.1 Glutathione S-transferase (AHRD V3.11 *** tr|T1PG87|T1PG87_MUSDO). Similar to MCOT20027.1.CC XP_017301050.1. AED 0.03	GO:0045454	cell redox homeostasis	--	--	GO:0005515//GO:0009055//GO:0015035	protein binding//electron carrier activity//protein disulfide oxidoreductase activity	K00799 glutathione S-transferase [EC:2.5.1.18] | (RefSeq) glutathione S-transferase	http://www.genome.jp/dbget-bin/www_bget?api:100167906	DcitrP020605.1	Glutathione S-transferase (AHRD V3.11 *** tr|T1PG87|T1PG87_MUSDO). Similar to MCOT20027.1.CC XP_017301050.1. AED 0.03
DcitrP103325.1	DcitrP103325.1	ScVcwli_3671:98458-119768	253.55	127.806	1.54215	0.000263587	0.0199766	Unknown protein.	--	--	GO:0005634	nucleus	GO:0005515//GO:0008270	protein binding//zinc ion binding	--	--	DcitrP103325.1	UPF0740 protein CG3062 (AHRD V3.11 *-* tr|A0A0K8VD55|A0A0K8VD55_BACLA). Similar to MCOT10359.0.MM XP_017298816.1. AED 0.04||Unknown protein. AED 0.43
DcitrP030815.1	DcitrP030815.1	ScVcwli_1145:284641-351940	4.79001	2.41041	1.52785	6.802e-05	0.00715255	DcitrP030815.1.1 Delta-1-pyrroline-5-carboxylate synthase (AHRD V3.11 *** tr|A0A1S6KZB3|A0A1S6KZB3_NILLU). Similar to MCOT04270.0.CT. AED 0.15	GO:0008152//GO:0006099//GO:0000160//GO:0055114	metabolic process//tricarboxylic acid cycle//phosphorelay signal transduction system//oxidation-reduction process	--	--	GO:0003994//GO:0000156//GO:0016491//GO:0005524//GO:0003677	aconitate hydratase activity//phosphorelay response regulator activity//oxidoreductase activity//ATP binding//DNA binding	K12657 delta-1-pyrroline-5-carboxylate synthetase [EC:2.7.2.11 1.2.1.41] | (RefSeq) delta-1-pyrroline-5-carboxylate synthase	http://www.genome.jp/dbget-bin/www_bget?api:100159277	DcitrP030815.1	Delta-1-pyrroline-5-carboxylate synthase (AHRD V3.11 *** tr|A0A1S6KZB3|A0A1S6KZB3_NILLU). Similar to MCOT04270.0.CT. AED 0.15||Delta-1-pyrroline-5-carboxylate synthase (AHRD V3.11 *** tr|A0A1S6KZB3|A0A1S6KZB3_NILLU). Similar to MCOT04270.0.CT. AED 0.19
XLOC_005007	XLOC_005007	ScVcwli_153:1518870-1702666	796.272	379.184	1.51637	0.000477499	0.0298295		--	--	--	--	--	--	--	--	--	--
DcitrP069505.1	DcitrP069505.1	ScVcwli_2805:334062-337723	1450.93	708.836	1.50643	0.000252962	0.0193951	Unknown protein. Similar to MCOT12935.3.CO. AED 0.18	--	--	--	--	--	--	--	--	DcitrP069505.1	Unknown protein. Similar to MCOT12935.3.CO. AED 0.18||Unknown protein. AED 0.03
DcitrP049415.1	DcitrP049415.1	ScVcwli_2040:49653-57138	3.40937	1.66043	1.48561	0.000546399	0.0325759	>DcitrP049415.1.1 conserved hypothetical protein [Riptortus pedestris] (AHRD V3.11 *-* BAN21306.1:1-413). Similar to MCOT03534.0.CO XP_017302538.1.	GO:0007186	G-protein coupled receptor signaling pathway	GO:0016021	integral component of membrane	GO:0004930	G-protein coupled receptor activity	--	--	DcitrP049415.1	conserved hypothetical protein [Riptortus pedestris] (AHRD V3.11 *-* BAN21306.1:1-413). Similar to MCOT03534.0.CO XP_017302538.1. AED 0.16
DcitrP008000.1	DcitrP008000.1	ScVcwli_357:358032-360566	9.50484	4.95457	1.47375	0.000509955	0.0313085	Unknown protein. AED 0.73	--	--	--	--	--	--	--	--	DcitrP008000.1	Unknown protein. AED 0.73
DcitrP042945.1	DcitrP042945.1	ScVcwli_1703:1786918-1789127	75.7151	39.1712	1.45534	4.28909e-06	0.000846304	>DcitrP042945.1.1 Dolichyl-diphosphooligosaccharide--protein glycosyltransferase 48 kDa subunit (AHRD V3.11 *** tr|A0A182LL65|A0A182LL65_9DIPT). Similar to MCOT15933.0.CT. AED 0.13| InterPro:IPR005013,Pfam:PF03345| GO:0005789,GO:0018279	GO:0018279	protein N-linked glycosylation via asparagine	GO:0005789	endoplasmic reticulum membrane	--	--	K12670 oligosaccharyltransferase complex subunit beta | (RefSeq) dolichyl-diphosphooligosaccharide--protein glycosyltransferase 48 kDa subunit	http://www.genome.jp/dbget-bin/www_bget?api:100572249	DcitrP042945.1	Dolichyl-diphosphooligosaccharide--protein glycosyltransferase 48 kDa subunit (AHRD V3.11 *** tr|A0A182LL65|A0A182LL65_9DIPT). Similar to MCOT15933.0.CT. AED 0.13
DcitrP091755.1	DcitrP091755.1	ScVcwli_3487:1125200-1155464	77.0713	39.2828	1.44775	8.67397e-05	0.00848393	DcitrP091755.1.1 40S ribosomal protein SA (AHRD V3.11 *** tr	GO:0006412	translation	GO:0005840//GO:0019867//GO:0005622	ribosome//outer membrane//intracellular	GO:0046983//GO:0003735//GO:2001070	protein dimerization activity//structural constituent of ribosome//starch binding	K02998 small subunit ribosomal protein SAe | (RefSeq) 40S ribosomal protein SA	http://www.genome.jp/dbget-bin/www_bget?api:100163169	DcitrP091755.1	40S ribosomal protein SA (AHRD V3.11 *** tr|A0A1B6CY39|A0A1B6CY39_9HEMI). AED 0.21||40S ribosomal protein SA (AHRD V3.11 *** tr|A0A1B6CY39|A0A1B6CY39_9HEMI). AED 0.19||40S ribosomal protein SA (AHRD V3.11 *** tr|A0A1B6CY39|A0A1B6CY39_9HEMI). AED 0.20
DcitrP009250.1	DcitrP009250.1	ScVcwli_420:108784-109986	141.964	74.8377	1.43639	9.98606e-05	0.0094776	Unknown protein	--	--	--	--	--	--	--	--	DcitrP009250.1	Unknown protein. AED 0.09
DcitrP041075.1	DcitrP041075.1	ScVcwli_1643:1061345-1066402	222.997	117.479	1.40862	3.22887e-05	0.00386158	Unknown protein	GO:0055114	oxidation-reduction process	--	--	GO:0016616	oxidoreductase activity, acting on the CH-OH group of donors, NAD or NADP as acceptor	--	--	DcitrP041075.1	Unknown protein. AED 0.55
DcitrP081455.1	DcitrP081455.1	ScVcwli_3334:417082-419713	6453.59	3302.08	1.39757	0.000374599	0.0258348	Unknown protein. AED 0.14	--	--	--	--	--	--	--	--	DcitrP081455.1	Unknown protein. AED 0.14||Unknown protein. AED 0.00
XLOC_000138	XLOC_000138	ScVcwli_1002:1547735-1565950	8.09346	3.45034	1.39692	0.000211774	0.0168523		--	--	--	--	--	--	--	--	--	--
DcitrP050505.1	DcitrP050505.1	ScVcwli_2056:473241-512789	1.19997	0.656774	1.38158	0.000830915	0.0435589	>DcitrP050505.1.1 Spondin-1 (AHRD V3.11 *** tr|A0A067QSB9|A0A067QSB9_ZOONE). Similar to MCOT13537.0.CT. AED 0.15	GO:0006355	regulation of transcription, DNA-templated	--	--	GO:0004222//GO:0003677//GO:0004867	metalloendopeptidase activity//DNA binding//serine-type endopeptidase inhibitor activity	no KO assigned | (RefSeq) spondin-1	http://www.genome.jp/dbget-bin/www_bget?api:100164477	DcitrP050505.1	Spondin-1 (AHRD V3.11 *** tr|A0A067QSB9|A0A067QSB9_ZOONE). Similar to MCOT13537.0.CT. AED 0.15||Spondin-1 (AHRD V3.11 *** tr|A0A067QSB9|A0A067QSB9_ZOONE). Similar to MCOT15373.2.CO. AED 0.18
DcitrP030830.1	DcitrP030830.1	ScVcwli_1145:22474-99757	3.38651	1.90729	1.37989	0.00035202	0.0250285	Delta-1-pyrroline-5-carboxylate synthase (AHRD V3.11 *** tr|A0A0T6B002|A0A0T6B002_9SCAR). Similar to MCOT04270.0.CT. AED 0.25	GO:0055114//GO:0006099//GO:0045116//GO:0008152	oxidation-reduction process//tricarboxylic acid cycle//protein neddylation//metabolic process	--	--	GO:0005524//GO:0016491//GO:0016881//GO:0003994	ATP binding//oxidoreductase activity//acid-amino acid ligase activity//aconitate hydratase activity	K12657 delta-1-pyrroline-5-carboxylate synthetase [EC:2.7.2.11 1.2.1.41] | (RefSeq) delta-1-pyrroline-5-carboxylate synthase	http://www.genome.jp/dbget-bin/www_bget?api:100159277	DcitrP030830.1	Delta-1-pyrroline-5-carboxylate synthase (AHRD V3.11 *** tr|A0A0T6B002|A0A0T6B002_9SCAR). Similar to MCOT04270.0.CT. AED 0.25
DcitrP023610.1	DcitrP023610.1	ScVcwli_950:548070-555514	5.87633	3.20032	1.37902	8.98745e-05	0.00868927	>DcitrP023610.1.1 Gag polyprotein	GO:0009405	pathogenesis	GO:0016020	membrane	GO:0003676//GO:0008270	nucleic acid binding//zinc ion binding	no KO assigned | (RefSeq) uncharacterized LOC103307755	http://www.genome.jp/dbget-bin/www_bget?api:103307755	DcitrP023610.1	Gag polyprotein (AHRD V3.11 *** tr|A0A0A9YJD0|A0A0A9YJD0_LYGHE). AED 0.83
XLOC_024955	XLOC_024955	ScVcwli_3513:1652913-1661335	2.86524	1.58728	1.37787	0.000743303	0.0405777		--	--	--	--	--	--	--	--	--	--
DcitrP081730.1	DcitrP081730.1	ScVcwli_3338:632811-634898	3248.86	1783.15	1.3542	4.4178e-06	0.000846336	Unknown protein. Similar to MCOT02699.2.CT XP_017304023.1. AED 0.25	--	--	--	--	--	--	--	--	DcitrP081730.1	Unknown protein. Similar to MCOT02699.2.CT XP_017304023.1. AED 0.25||Unknown protein. Similar to MCOT02699.2.CT XP_017304023.1. AED 0.00
DcitrP081740.1	DcitrP081740.1	ScVcwli_3338:639445-640990	1435.63	801.217	1.33077	7.6934e-06	0.00131551	Unknown protein. Similar to MCOT01370.2.CO XP_017298359.1. AED 0.00	--	--	--	--	--	--	--	--	DcitrP081740.1	Unknown protein. Similar to MCOT01370.2.CO XP_017298359.1. AED 0.00
DcitrP046440.1	DcitrP046440.1	ScVcwli_1907:523752-535310	3.04718	1.69484	1.31966	0.000677157	0.0377638	Unknown protein	--	--	--	--	--	--	--	--	DcitrP046440.1	Unknown protein. AED 0.15
DcitrP033650.1	DcitrP033650.1	ScVcwli_1272:124001-165681	5918.08	3323.89	1.3143	0.000167081	0.0141098	Golgi-associated plant pathogenesis-related protein 1 (AHRD V3.11 *-* tr|A0A194RIZ1|A0A194RIZ1_PAPMA). AED 0.11	GO:0006457//GO:0044341//GO:0034220//GO:0045892	protein folding//sodium-dependent phosphate transport//ion transmembrane transport//negative regulation of transcription, DNA-templated	GO:0016021//GO:0016020	integral component of membrane//membrane	GO:0003677//GO:0015321//GO:0042803//GO:0015075//GO:0051087//GO:0000774//GO:0016846	DNA binding//sodium-dependent phosphate transmembrane transporter activity//protein homodimerization activity//ion transmembrane transporter activity//chaperone binding//adenyl-nucleotide exchange factor activity//carbon-sulfur lyase activity	no KO assigned | (RefSeq) CG16995-like	http://www.genome.jp/dbget-bin/www_bget?api:100169092	DcitrP033650.1	Golgi-associated plant pathogenesis-related protein 1 (AHRD V3.11 *-* tr|A0A194RIZ1|A0A194RIZ1_PAPMA). AED 0.14||Golgi-associated plant pathogenesis-related protein 1 (AHRD V3.11 *-* tr|A0A194RIZ1|A0A194RIZ1_PAPMA). AED 0.12||Golgi-associated plant pathogenesis-related protein 1 (AHRD V3.11 *-* tr|A0A194RIZ1|A0A194RIZ1_PAPMA). AED 0.11
XLOC_000694	XLOC_000694	ScVcwli_1044:508409-509726	4415.85	2453.89	1.3029	3.74494e-05	0.00440243		--	--	--	--	--	--	--	--	--	--
DcitrP044230.1	DcitrP044230.1	ScVcwli_1786:156857-163850	4.08419	2.37286	1.28475	0.000647079	0.0363806	Monoacylglycerol lipase ABHD12 (AHRD V3.11 *-* tr	--	--	--	--	--	--	K13704 abhydrolase domain-containing protein 12 [EC:3.1.1.23] | (RefSeq) monoacylglycerol lipase ABHD12-like	http://www.genome.jp/dbget-bin/www_bget?api:100575029	DcitrP044230.1	Monoacylglycerol lipase ABHD12 (AHRD V3.11 *-* tr|A0A0L7RC58|A0A0L7RC58_9HYME). AED 0.51
XLOC_000693	XLOC_000693	ScVcwli_1044:505977-507814	841.706	487.207	1.27068	0.000607692	0.0343578		--	--	--	--	--	--	--	--	--	--
DcitrP101290.1	DcitrP101290.1	ScVcwli_3634:509339-511592	734.803	422.164	1.2473	0.000174209	0.0145927	Unknown protein. Similar to MCOT20842.0.CT. AED 0.06	--	--	--	--	GO:0005515	protein binding	--	--	DcitrP101290.1	Unknown protein. Similar to MCOT20842.0.CT. AED 0.06
DcitrP009630.1	DcitrP009630.1	ScVcwli_425:1117944-1123653	20.6694	12.4086	1.23452	0.000122012	0.0111208	Fatty acid-binding protein (AHRD V3.11 *** tr|A0A0G3YKZ9|A0A0G3YKZ9_APHGO). Similar to MCOT03897.0.CC XP_008486453.1	--	--	--	--	--	--	K08756 fatty acid-binding protein 7, brain | (RefSeq) MPA13 allergen-like	http://www.genome.jp/dbget-bin/www_bget?api:100168295	DcitrP009630.1	Fatty acid-binding protein (AHRD V3.11 *** tr|A0A0G3YKZ9|A0A0G3YKZ9_APHGO). Similar to MCOT03897.0.CC XP_008486453.1. AED 0.34
DcitrP063055.1	DcitrP063055.1	ScVcwli_2551:21349-22398	1748.07	1044.46	1.23135	2.91152e-05	0.00365087	Unknown protein. Similar to MCOT01360.2.CT XP_008478152.1. AED 0.00	--	--	--	--	--	--	--	--	DcitrP063055.1	Unknown protein. Similar to MCOT01360.2.CT XP_008478152.1. AED 0.00
DcitrP009625.1	DcitrP009625.1	ScVcwli_425:968306-989804	488.475	297.235	1.18984	0.000388564	0.0263352	>DcitrP009625.1.1 Elongation of very long chain fatty acids protein (AHRD V3.11 *** tr|T1H7Y8|T1H7Y8_RHOPR). AED 0.34	--	--	GO:0016021	integral component of membrane	--	--	K10249 elongation of very long chain fatty acids protein 4 [EC:2.3.1.199] | (RefSeq) elongation of very long chain fatty acids protein 4	http://www.genome.jp/dbget-bin/www_bget?api:100574502	DcitrP009625.1	Elongation of very long chain fatty acids protein (AHRD V3.11 *** tr|T1H7Y8|T1H7Y8_RHOPR). AED 0.34
DcitrP017380.1	DcitrP017380.1	ScVcwli_705:535255-536459	116.849	74.285	1.18469	0.000431466	0.0280725	Unknown protein. Similar to XP_008469577.1. AED 0.00	GO:0044237	cellular metabolic process	--	--	GO:0003824	catalytic activity	--	--	DcitrP017380.1	Unknown protein. Similar to XP_008469577.1. AED 0.00
DcitrP029195.1	DcitrP029195.1	ScVcwli_1117:456638-470203	41.4567	26.2467	1.16838	0.00049857	0.0307007	>DcitrP029195.1.1 Mitochondrial import inner membrane translocase subunit Tim22	--	--	--	--	--	--	K17790 mitochondrial import inner membrane translocase subunit TIM22 | (RefSeq) mitochondrial import inner membrane translocase subunit Tim22	http://www.genome.jp/dbget-bin/www_bget?api:100570630	DcitrP029195.1	Mitochondrial import inner membrane translocase subunit Tim22 (AHRD V3.11 *-* tr|A0A067R5Z6|A0A067R5Z6_ZOONE). AED 0.10
DcitrP016435.1	DcitrP016435.1	ScVcwli_663:205401-284986	3.76106	2.3866	1.16262	0.000752228	0.040636	>DcitrP016435.1.1 lysozyme i-type-RA. (AHRD V3.11 *-* lysozyme tr|A0A1W4VCB0|	--	--	--	--	GO:0003796	lysozyme activity	no KO assigned | (RefSeq) uncharacterized LOC100160909	http://www.genome.jp/dbget-bin/www_bget?api:100160909	DcitrP016435.1	lysozyme i-type-RA. (AHRD V3.11 *-* lysozyme tr|A0A1W4VCB0|A0A1W4VCB0_DROFC). AED 0.20
DcitrP022450.1	DcitrP022450.1	ScVcwli_921:97136-98401	1440.95	878.371	1.16211	0.000437665	0.0283865	Unknown protein. AED 0.17	--	--	--	--	--	--	--	--	DcitrP022450.1	Unknown protein. AED 0.17
DcitrP037890.1	DcitrP037890.1	ScVcwli_1465:26635-30054	4163.85	2586.69	1.16162	0.00012579	0.0112666	>DcitrP037890.1.1 Unknown protein. Similar to MCOT23076.3.CC XP_017302380.1. AED 0.10	--	--	--	--	--	--	--	--	DcitrP037890.1	Unknown protein. Similar to MCOT23076.3.CC XP_017302380.1. AED 0.10
DcitrP030870.1	DcitrP030870.1	ScVcwli_1145:521288-522134	5879.02	3704.82	1.14799	6.81031e-05	0.00715255	Unknown protein. Similar to MCOT01360.2.CT XP_008478152.1. AED 0.00	--	--	--	--	--	--	--	--	DcitrP030870.1	Unknown protein. Similar to MCOT01360.2.CT XP_008478152.1. AED 0.00
DcitrP027035.1	DcitrP027035.1	ScVcwli_1039:1840644-1893915	2044.7	1311.33	1.0919	0.000792681	0.0423787	Unknown protein.	--	--	--	--	--	--	--	--	DcitrP027035.1	Unknown protein. AED 0.00
XLOC_015749	XLOC_015749	ScVcwli_2737:651-11020	125.514	84.3944	1.07472	0.000451109	0.0287318		--	--	--	--	--	--	--	--	--	--
DcitrP023605.1	DcitrP023605.1	ScVcwli_950:538892-547818	26.3469	17.9696	1.06967	0.000864844	0.0446225	Unknown protein.	GO:0019050	suppression by virus of host apoptotic process	--	--	--	--	--	--	DcitrP023605.1	Unknown protein. AED 0.09
DcitrP023480.1	DcitrP023480.1	ScVcwli_950:108006-113349	9077.95	5894.42	1.06809	0.000857616	0.0443602	Unknown protein. Similar to XP_008474732.1	GO:0006457	protein folding	GO:0005783	endoplasmic reticulum	GO:0005509//GO:0051082	calcium ion binding//unfolded protein binding	--	--	DcitrP023480.1	Unknown protein. Similar to XP_008474732.1. AED 0.15
DcitrP081735.1	DcitrP081735.1	ScVcwli_3338:637184-641017	2037.05	1378.42	1.06382	0.00062292	0.0351178	Unknown protein. Similar to MCOT06402.0.CT. AED 0.04	--	--	--	--	--	--	--	--	DcitrP081735.1	Unknown protein. Similar to MCOT06402.0.CT. AED 0.04
DcitrP051375.1	DcitrP051375.1	ScVcwli_2134:44701-55899	93.6694	64.3725	1.04588	0.000547917	0.0325759	Glyoxalase domain-containing protein 4 (AHRD V3.11 *** tr|A0A067RDT8|A0A067RDT8_ZOONE). Similar to MCOT20987.0.CT. AED 0.33	GO:0055114	oxidation-reduction process	--	--	GO:0016491//GO:0005506	oxidoreductase activity//iron ion binding	no KO assigned | (RefSeq) Jhbp; juvenile hormone binding protein	http://www.genome.jp/dbget-bin/www_bget?api:100165477	DcitrP051375.1	Glyoxalase domain-containing protein 4 (AHRD V3.11 *** tr|A0A067RDT8|A0A067RDT8_ZOONE). Similar to MCOT20987.0.CT. AED 0.33
DcitrP041975.1	DcitrP041975.1	ScVcwli_1677:129234-130745	2893.03	1921.95	1.0433	0.000710015	0.0390697	Unknown protein. Similar to MCOT05882.1.CC XP_008481832.1. AED 0.07	--	--	--	--	--	--	--	--	DcitrP041975.1	Unknown protein. Similar to MCOT05882.1.CC XP_008481832.1. AED 0.07
DcitrP081725.1	DcitrP081725.1	ScVcwli_3338:629906-632050	15644.3	10750.2	1.02063	0.000552517	0.0326212	Unknown protein. Similar to MCOT05222.0.CC XP_008469032.1. AED 0.05	GO:0055085//GO:0006811	transmembrane transport//ion transport	GO:0016020	membrane	GO:0015075//GO:0008289	ion transmembrane transporter activity//lipid binding	--	--	DcitrP081725.1	Unknown protein. Similar to MCOT05222.0.CC XP_008469032.1. AED 0.05||Unknown protein. Similar to MCOT05222.0.CC XP_008469031.1. AED 0.01
DcitrP094660.1	DcitrP094660.1	ScVcwli_3523:298404-302355	529.377	374.829	0.98251	0.000856223	0.0443602	>DcitrP094660.1.1 CG13868-PA (AHRD V3.11 *** FBpp0085610). AED 0.30	--	--	--	--	--	--	no KO assigned | (RefSeq) uncharacterized LOC100163615	http://www.genome.jp/dbget-bin/www_bget?api:100163615	DcitrP094660.1	CG13868-PA (AHRD V3.11 *** FBpp0085610). AED 0.30
DcitrP078745.1	DcitrP078745.1	ScVcwli_3229:13891-25255	8.25485	23.7738	-1.04228	0.0007459	0.0406123	>DcitrP078745.1.1 Unknown protein. AED 0.09	--	--	--	--	--	--	--	--	DcitrP078745.1	Unknown protein. AED 0.09
DcitrP076625.1	DcitrP076625.1	ScVcwli_3135:227337-228734	57.712	169.713	-1.06789	0.000751972	0.040636	>DcitrP076625.1.1 Pterin-4-alpha-carbinolamine dehydratase-like Protein (AHRD V3.11 *** tr|D6WSN1|D6WSN1_TRICA). Similar to MCOT21045.0.CC XP_008467798.1. AED 0.16| InterPro:IPR001533,Pfam:PF01329| GO:0006729,GO:0008124	GO:0006729//GO:0006955	tetrahydrobiopterin biosynthetic process//immune response	GO:0005576	extracellular region	GO:0005129//GO:0008083//GO:0008124	granulocyte macrophage colony-stimulating factor receptor binding//growth factor activity//4-alpha-hydroxytetrahydrobiopterin dehydratase activity	K01724 4a-hydroxytetrahydrobiopterin dehydratase [EC:4.2.1.96] | (RefSeq) pterin-4-alpha-carbinolamine dehydratase	http://www.genome.jp/dbget-bin/www_bget?api:100159480	DcitrP076625.1	Pterin-4-alpha-carbinolamine dehydratase-like Protein (AHRD V3.11 *** tr|D6WSN1|D6WSN1_TRICA). Similar to MCOT21045.0.CC XP_008467798.1. AED 0.16
DcitrP041785.1	DcitrP041785.1	ScVcwli_1663:517512-525826	7.37856	22.3023	-1.09413	0.000686046	0.0380544	>DcitrP041785.1.1 UDP-N-acetylglucosamine pyrophosphorylase 1-RA. (AHRD V3.11 *** UDP-N-acetylhexosamine pyrophosphorylase tr|W8CA07|W8CA07_CERCA). AED 0.11	GO:0006750//GO:0008152	glutathione biosynthetic process//metabolic process	GO:0005576	extracellular region	GO:0004357//GO:0070569//GO:0016624	glutamate-cysteine ligase activity//uridylyltransferase activity//oxidoreductase activity, acting on the aldehyde or oxo group of donors, disulfide as acceptor	K00972 UDP-N-acetylglucosamine/UDP-N-acetylgalactosamine diphosphorylase [EC:2.7.7.23 2.7.7.83] | (RefSeq) UDP-N-acetylhexosamine pyrophosphorylase	http://www.genome.jp/dbget-bin/www_bget?api:100163539	DcitrP041785.1	UDP-N-acetylglucosamine pyrophosphorylase 1-RA. (AHRD V3.11 *** UDP-N-acetylhexosamine pyrophosphorylase tr|W8CA07|W8CA07_CERCA). AED 0.11
DcitrP073690.1	DcitrP073690.1	ScVcwli_2994:588430-603013	10.8028	32.7998	-1.1217	0.000207676	0.0167191	>DcitrP073690.1.1 Transgelin (AHRD V3.11 *** tr|A0A2A3EBY9|A0A2A3EBY9_APICC). Similar to MCOT21359.2.CO XP_008468397.1. AED 0.14| InterPro:IPR001715,Pfam:PF00307| GO:0005515	--	--	--	--	GO:0005515	protein binding	K20526 transgelin | (RefSeq) calponin-like	http://www.genome.jp/dbget-bin/www_bget?api:100162420	DcitrP073690.1	Transgelin (AHRD V3.11 *** tr|A0A2A3EBY9|A0A2A3EBY9_APICC). Similar to MCOT21359.2.CO XP_008468397.1. AED 0.14
DcitrP023360.1	DcitrP023360.1	ScVcwli_943:894548-902256	8.30488	25.2678	-1.12359	0.00058535	0.0337374	>DcitrP023360.1.1 vitamin e uncharacterized protein -RA. (AHRD V3.11 *** Clavesin-1 tr|A0A026X4A6|A0A026X4A6_OOCBI). AED 0.16	--	--	--	--	--	--	no KO assigned | (RefSeq) clavesin-1	http://www.genome.jp/dbget-bin/www_bget?api:100168153	DcitrP023360.1	vitamin e uncharacterized protein -RA. (AHRD V3.11 *** Clavesin-1 tr|A0A026X4A6|A0A026X4A6_OOCBI). AED 0.16
DcitrP103380.1	DcitrP103380.1	ScVcwli_3674:65455-87422	1.30337	4.01813	-1.13763	0.000821692	0.0434755	>DcitrP103380.1.1 Aminopeptidase (AHRD V3.11 *** tr|X1WZL8|X1WZL8_ACYPI). AED 0.15	GO:0006418	tRNA aminoacylation for protein translation	--	--	GO:0008237//GO:0005524//GO:0000166//GO:0004812//GO:0008270	metallopeptidase activity//ATP binding//nucleotide binding//aminoacyl-tRNA ligase activity//zinc ion binding	K11141 glutamyl aminopeptidase [EC:3.4.11.7] | (RefSeq) endoplasmic reticulum aminopeptidase 1	http://www.genome.jp/dbget-bin/www_bget?api:100163791	DcitrP103380.1	Aminopeptidase (AHRD V3.11 *** tr|X1WZL8|X1WZL8_ACYPI). AED 0.15
DcitrP012830.1	DcitrP012830.1	ScVcwli_521:901181-904168	24.0955	74.1431	-1.13765	0.000337846	0.0241035	>DcitrP012830.1.1 Translation factor SUI1-like protein (AHRD V3.11 *** tr|A0A026WTM9|A0A026WTM9_OOCBI). Similar to XP_008485331.1. AED 0.01| InterPro:IPR001950,Pfam:PF01253| GO:0003743,GO:0006413	GO:0006413	translational initiation	--	--	GO:0003743	translation initiation factor activity	K03113 translation initiation factor 1 | (RefSeq) protein translation factor SUI1 homolog	http://www.genome.jp/dbget-bin/www_bget?api:100163085	DcitrP012830.1	Translation factor SUI1-like protein (AHRD V3.11 *** tr|A0A026WTM9|A0A026WTM9_OOCBI). Similar to XP_008485331.1. AED 0.01
DcitrP034510.1	DcitrP034510.1	ScVcwli_1319:396575-458323	0.965468	3.0314	-1.1415	0.000841406	0.0438506	>DcitrP034510.1.1 Formin-binding protein 1-like (AHRD V3.11 *-* tr|E2A0X3|E2A0X3_CAMFO). AED 0.31	GO:0006486//GO:0009451//GO:0007165//GO:0001522//GO:0007155//GO:0006914	protein glycosylation//RNA modification//signal transduction//pseudouridine synthesis//cell adhesion//autophagy	GO:0016020	membrane	GO:0003723//GO:0005515//GO:0009982//GO:0030246//GO:0008378	RNA binding//protein binding//pseudouridine synthase activity//carbohydrate binding//galactosyltransferase activity	K20121 formin-binding protein 1 | (RefSeq) formin-binding protein 1-like	http://www.genome.jp/dbget-bin/www_bget?api:100166693	DcitrP034510.1	Formin-binding protein 1-like (AHRD V3.11 *-* tr|E2A0X3|E2A0X3_CAMFO). AED 0.31
DcitrP078760.1	DcitrP078760.1	ScVcwli_3229:93734-94291	88.3075	275.224	-1.1422	0.000390764	0.0263352	>DcitrP078760.1.1 Very-long-chain (3R)-3-hydroxyacyl-CoA dehydratase (AHRD V3.11 *-* tr|E0VMB9|E0VMB9_PEDHC). Similar to MCOT13924.0.CT. AED 0.40	--	--	--	--	--	--	K15730 cytosolic prostaglandin-E synthase [EC:5.3.99.3] | (RefSeq) co-chaperone protein daf-41	http://www.genome.jp/dbget-bin/www_bget?api:100159849	DcitrP078760.1	Very-long-chain (3R)-3-hydroxyacyl-CoA dehydratase (AHRD V3.11 *-* tr|E0VMB9|E0VMB9_PEDHC). Similar to MCOT13924.0.CT. AED 0.40
DcitrP093300.1	DcitrP093300.1	ScVcwli_3505:2534420-2543618	58.23	182.167	-1.14549	0.000301238	0.0223391	>DcitrP093300.1.1 Na(+)/H(+) exchange regulatory cofactor NHE-RF2 (AHRD V3.11 *-* tr|A0A067QKP0|A0A067QKP0_ZOONE). Similar to MCOT18603.2.CC XP_017298727.1. AED 0.00	--	--	--	--	GO:0005515	protein binding	K13365 Na(+)/H(+) exchange regulatory cofactor NHE-RF1 | (RefSeq) Na(+)/H(+) exchange regulatory cofactor NHE-RF1	http://www.genome.jp/dbget-bin/www_bget?api:103311490	DcitrP093300.1	Na(+)/H(+) exchange regulatory cofactor NHE-RF2 (AHRD V3.11 *-* tr|A0A067QKP0|A0A067QKP0_ZOONE). Similar to MCOT18603.2.CC XP_017298727.1. AED 0.00
DcitrP081490.1	DcitrP081490.1	ScVcwli_3334:456948-458490	20.2033	63.1075	-1.14642	0.000532522	0.0322549	>DcitrP081490.1.1 Dpy-30-like protein (AHRD V3.11 *-* tr|A0A067R7V3|A0A067R7V3_ZOONE). Similar to MCOT08286.0.OO XP_008467484.2. AED 0.46	--	--	--	--	--	--	K14965 protein dpy-30 | (RefSeq) protein dpy-30 homolog	http://www.genome.jp/dbget-bin/www_bget?api:100168522	DcitrP081490.1	Dpy-30-like protein (AHRD V3.11 *-* tr|A0A067R7V3|A0A067R7V3_ZOONE). Similar to MCOT08286.0.OO XP_008467484.2. AED 0.46
DcitrP005130.1	DcitrP005130.1	ScVcwli_238:175471-196745	12.308	38.9856	-1.15639	0.000389929	0.0263352	>DcitrP005130.1.1 14-3-3 zeta (AHRD V3.11 *-* tr|G9I551|G9I551_9HYME). AED 0.29| InterPro:IPR023410,Pfam:PF00244	GO:0016032	viral process	GO:0019013	viral nucleocapsid	GO:0005525	GTP binding	K16197 14-3-3 protein beta/theta/zeta | (RefSeq) 14-3-3zeta; 14-3-3 protein zeta	http://www.genome.jp/dbget-bin/www_bget?api:100161970	DcitrP005130.1	14-3-3 zeta (AHRD V3.11 *-* tr|G9I551|G9I551_9HYME). AED 0.29
DcitrP078265.1	DcitrP078265.1	ScVcwli_3191:1906-2647	40.6914	128.158	-1.16287	0.000364969	0.0252548	>DcitrP078265.1.1 Vesicle-trafficking protein SEC22b (AHRD V3.11 *** tr|A0A0A9YRB3|A0A0A9YRB3_LYGHE). Similar to MCOT17001.0.CC XP_008482700.1. AED 1.00	GO:0016192//GO:0015986	vesicle-mediated transport//ATP synthesis coupled proton transport	GO:0019028//GO:0045263//GO:0016021	viral capsid//proton-transporting ATP synthase complex, coupling factor F(o)//integral component of membrane	GO:0015078	hydrogen ion transmembrane transporter activity	K08517 vesicle transport protein SEC22 | (RefSeq) transport protein SEC22-like	http://www.genome.jp/dbget-bin/www_bget?api:100168828	DcitrP078265.1	Vesicle-trafficking protein SEC22b (AHRD V3.11 *** tr|A0A0A9YRB3|A0A0A9YRB3_LYGHE). Similar to MCOT17001.0.CC XP_008482700.1. AED 1.00
XLOC_006808	XLOC_006808	ScVcwli_1720:27986-58013	1.27838	4.00803	-1.17157	0.000839182	0.0438452		--	--	--	--	--	--	--	--	--	--
DcitrP012115.1	DcitrP012115.1	ScVcwli_500:478644-481820	11.8066	37.5056	-1.17757	0.000306882	0.022498	>DcitrP012115.1.1 Odr-4-like protein (AHRD V3.11 *** tr|A0A067QRT2|A0A067QRT2_ZOONE). Similar to MCOT16051.0.CC XP_008476451.1. AED 0.33| InterPro:IPR029454,Pfam:PF14778	--	--	--	--	--	--	no KO assigned | (RefSeq) protein odr-4 homolog	http://www.genome.jp/dbget-bin/www_bget?api:100168879	DcitrP012115.1	Odr-4-like protein (AHRD V3.11 *** tr|A0A067QRT2|A0A067QRT2_ZOONE). Similar to MCOT16051.0.CC XP_008476451.1. AED 0.33
DcitrP090280.1	DcitrP090280.1	ScVcwli_3470:735932-742830	8.08915	26.3647	-1.19126	0.000511755	0.0313261	>DcitrP090280.1.1 Vacuolar protein sorting-associated protein VTA1 (AHRD V3.11 *-* tr|A0A0A9Y937|A0A0A9Y937_LYGHE). Similar to MCOT02171.0.CC XP_008472019.1. AED 0.00	--	--	--	--	--	--	K12199 vacuolar protein sorting-associated protein VTA1 | (RefSeq) Vta1; Vps20-associated 1 homolog	http://www.genome.jp/dbget-bin/www_bget?api:100168747	DcitrP090280.1	Vacuolar protein sorting-associated protein VTA1 (AHRD V3.11 *-* tr|A0A0A9Y937|A0A0A9Y937_LYGHE). Similar to MCOT02171.0.CC XP_008472019.1. AED 0.00
DcitrP024025.1	DcitrP024025.1	ScVcwli_968:18936-24955	22.2787	72.3172	-1.20856	0.000124234	0.0112117	>DcitrP024025.1.1 UPF0585 protein C16orf13 (AHRD V3.11 *** tr|A0A0A9Y822|A0A0A9Y822_LYGHE). Similar to MCOT18675.0.CO. AED 0.08| InterPro:IPR010342,Pfam:PF06080	GO:0006400	tRNA modification	--	--	GO:0008176	tRNA (guanine-N7-)-methyltransferase activity	K15001 cytochrome P450 family 4 [EC:1.14.-.-] | (RefSeq) cytochrome P450 4C1	http://www.genome.jp/dbget-bin/www_bget?api:100162179	DcitrP024025.1	UPF0585 protein C16orf13 (AHRD V3.11 *** tr|A0A0A9Y822|A0A0A9Y822_LYGHE). Similar to MCOT18675.0.CO. AED 0.04||UPF0585 protein C16orf13 (AHRD V3.11 *** tr|A0A0A9Y822|A0A0A9Y822_LYGHE). Similar to MCOT18675.0.CO. AED 0.13||UPF0585 protein C16orf13 (AHRD V3.11 *** tr|A0A0A9Y822|A0A0A9Y822_LYGHE). Similar to MCOT18675.0.CO. AED 0.08
DcitrP054635.1	DcitrP054635.1	ScVcwli_2201:33454-40600	2.44	7.9741	-1.21106	0.000581566	0.0337093	>DcitrP054635.1.1 EH domain-containing protein 1 (AHRD V3.11 *** tr|E2C8F3|E2C8F3_HARSA). Similar to MCOT03118.0.CT. AED 0.09	GO:0007264//GO:0002949	small GTPase mediated signal transduction//tRNA threonylcarbamoyladenosine modification	--	--	GO:0003924//GO:0005515//GO:0005525//GO:0005509	GTPase activity//protein binding//GTP binding//calcium ion binding	K12483 EH domain-containing protein 1 | (RefSeq) EH domain-containing protein 1	http://www.genome.jp/dbget-bin/www_bget?api:100166389	DcitrP054635.1	EH domain-containing protein 1 (AHRD V3.11 *** tr|E2C8F3|E2C8F3_HARSA). Similar to MCOT03118.0.CT. AED 0.09
DcitrP040835.1	DcitrP040835.1	ScVcwli_1643:41845-53345	20.0715	65.3067	-1.21624	8.64288e-05	0.00848393	>DcitrP040835.1.1 Vesicle-associated membrane protein-associated protein (AHRD V3.11 *-* tr|Q1HQV2|Q1HQV2_AEDAE). Similar to MCOT13956.1.CT. AED 0.05	GO:0006891	intra-Golgi vesicle-mediated transport	GO:0030173	integral component of Golgi membrane	GO:0046983	protein dimerization activity	no KO assigned | (RefSeq) Vap-33-1-like	http://www.genome.jp/dbget-bin/www_bget?api:100158747	DcitrP040835.1	Vesicle-associated membrane protein-associated protein (AHRD V3.11 *-* tr|Q1HQV2|Q1HQV2_AEDAE). Similar to MCOT13956.1.CT. AED 0.05||Vesicle-associated membrane protein-associated protein (AHRD V3.11 *-* tr|Q1HQV2|Q1HQV2_AEDAE). Similar to MCOT13956.1.CT. AED 0.11
DcitrP103175.1	DcitrP103175.1	ScVcwli_3668:272-8686	5.56911	18.3553	-1.22422	0.000796981	0.0423895	>DcitrP103175.1.1 Transmembrane protein 165 (AHRD V3.11 *** tr|E2B1I9|E2B1I9_CAMFO). Similar to MCOT05846.2.CT XP_008483522.2. AED 0.34	--	--	GO:0016020//GO:0016021	membrane//integral component of membrane	--	--	no KO assigned | (RefSeq) transmembrane protein 165	http://www.genome.jp/dbget-bin/www_bget?api:100161631	DcitrP103175.1	Transmembrane protein 165 (AHRD V3.11 *** tr|E2B1I9|E2B1I9_CAMFO). Similar to MCOT05846.2.CT XP_008483522.2. AED 0.34
DcitrP033525.1	DcitrP033525.1	ScVcwli_1260:399708-401507	9.12997	30.4535	-1.22945	0.000655578	0.0366592	>DcitrP033525.1.1 Calmodulin-lysine N-methyltransferase (AHRD V3.11 *** tr|A0A146LAB7|A0A146LAB7_LYGHE). Similar to MCOT21434.0.CC XP_008474407.1. AED 1.00| InterPro:IPR019410,Pfam:PF10294	--	--	--	--	GO:0008168	methyltransferase activity	--	--	DcitrP033525.1	Calmodulin-lysine N-methyltransferase (AHRD V3.11 *** tr|A0A146LAB7|A0A146LAB7_LYGHE). Similar to MCOT21434.0.CC XP_008474407.1. AED 1.00
DcitrP044395.1	DcitrP044395.1	ScVcwli_1793:274-7579	3.98121	13.0708	-1.23435	0.000198091	0.0160725	>DcitrP044395.1.1 Unknown protein. AED 0.00	GO:0006355	regulation of transcription, DNA-templated	GO:0019031//GO:0019028	viral envelope//viral capsid	GO:0005198//GO:0003700//GO:0043565	structural molecule activity//transcription factor activity, sequence-specific DNA binding//sequence-specific DNA binding	--	--	DcitrP044395.1	Unknown protein. AED 0.00
DcitrP074985.1	DcitrP074985.1	ScVcwli_3076:95689-102508	5.65762	18.1704	-1.23462	0.000431248	0.0280725	>DcitrP074985.1.1 gamma-glutamylcyclotransferase-like (AHRD V3.11 *** tr|A0A1W4WAV5|A0A1W4WAV5_AGRPL). Similar to MCOT23407.0.CT XP_008475063.1. AED 0.12,Pfam:PF13772	--	--	--	--	GO:0005515//GO:0046983	protein binding//protein dimerization activity	K08873 serine/threonine-protein kinase SMG1 [EC:2.7.11.1] | (RefSeq) serine/threonine-protein kinase SMG1	http://www.genome.jp/dbget-bin/www_bget?api:100169587	DcitrP074985.1	gamma-glutamylcyclotransferase-like (AHRD V3.11 *** tr|A0A1W4WAV5|A0A1W4WAV5_AGRPL). Similar to MCOT23407.0.CT XP_008475063.1. AED 0.12
DcitrP061420.1	DcitrP061420.1	ScVcwli_2479:129795-179943	0.742734	2.52792	-1.24328	0.000751376	0.040636	>DcitrP061420.1.1 Coiled-coil domain-containing protein 85c (AHRD V3.11 *-* tr|A0A161M587|A0A161M587_TRIIF). Similar to MCOT07301.0.OO. AED 0.24	GO:0043093//GO:0007049//GO:0006355//GO:0000917//GO:0006260//GO:0044780	FtsZ-dependent cytokinesis//cell cycle//regulation of transcription, DNA-templated//barrier septum assembly//DNA replication//bacterial-type flagellum assembly	GO:0005737//GO:0005634	cytoplasm//nucleus	GO:0003700	transcription factor activity, sequence-specific DNA binding	no KO assigned | (RefSeq) coiled-coil domain-containing protein 85C	http://www.genome.jp/dbget-bin/www_bget?api:100164285	DcitrP061420.1	Coiled-coil domain-containing protein 85c (AHRD V3.11 *-* tr|A0A161M587|A0A161M587_TRIIF). Similar to MCOT07301.0.OO. AED 0.24
DcitrP062520.1	DcitrP062520.1	ScVcwli_2521:506804-509954	5.01457	16.6148	-1.25037	0.000443101	0.0284713	>DcitrP062520.1.1 Myosin regulatory light chain sqh (AHRD V3.11 *** tr|A0A067QUS4|A0A067QUS4_ZOONE). Similar to MCOT20336.0.CC XP_017301966.1. AED 0.28	GO:0007165	signal transduction	GO:0005578	proteinaceous extracellular matrix	GO:0005509	calcium ion binding	K12757 myosin regulatory light chain 12 | (RefSeq) myosin regulatory light chain-like	http://www.genome.jp/dbget-bin/www_bget?api:100163913	DcitrP062520.1	Myosin regulatory light chain sqh (AHRD V3.11 *** tr|A0A067QUS4|A0A067QUS4_ZOONE). Similar to MCOT20336.0.CC XP_017301966.1. AED 0.28
DcitrP042525.1	DcitrP042525.1	ScVcwli_1702:54006-97348	1.00847	3.43054	-1.26232	0.000392236	0.0263486	>DcitrP042525.1.1 Unknown protein. Similar to MCOT00306.3.CT. AED 0.33	--	--	GO:0016020//GO:0005634	membrane//nucleus	GO:0004017//GO:0003677//GO:0046872	adenylate kinase activity//DNA binding//metal ion binding	--	--	DcitrP042525.1	Unknown protein. Similar to MCOT00306.3.CT. AED 0.33
DcitrP008395.1	DcitrP008395.1	ScVcwli_370:570180-600890	18.378	62.7283	-1.27176	0.000381224	0.0259458	>DcitrP008395.1.1 14-3-3 zeta (AHRD V3.11 *-* tr|G9I538|G9I538_BOMTE). AED 0.19	GO:0008152//GO:0006096//GO:0006741	metabolic process//glycolytic process//NADP biosynthetic process	--	--	GO:0016301//GO:0003951//GO:0003872	kinase activity//NAD+ kinase activity//6-phosphofructokinase activity	K16197 14-3-3 protein beta/theta/zeta | (RefSeq) 14-3-3zeta; 14-3-3 protein zeta	http://www.genome.jp/dbget-bin/www_bget?api:100161970	DcitrP008395.1	14-3-3 zeta (AHRD V3.11 *-* tr|G9I538|G9I538_BOMTE). AED 0.19
DcitrP068805.1	DcitrP068805.1	ScVcwli_2769:38100-42863	2.68691	9.15054	-1.27805	0.000731572	0.0401491	>DcitrP068805.1.1 Transcription factor TFIIIB component B''-like protein (AHRD V3.11 *-* tr|A0A067RCW0|A0A067RCW0_ZOONE). Similar to MCOT16715.0.CC XP_008468990.1. AED 0.00	GO:0006412	translation	GO:0005840//GO:0005622	ribosome//intracellular	GO:0003735	structural constituent of ribosome	K15198 transcription factor TFIIIB component B'' | (RefSeq) transcription factor TFIIIB component B'' homolog	http://www.genome.jp/dbget-bin/www_bget?api:100166880	DcitrP068805.1	Transcription factor TFIIIB component B''-like protein (AHRD V3.11 *-* tr|A0A067RCW0|A0A067RCW0_ZOONE). Similar to MCOT16715.0.CC XP_008468990.1. AED 0.00
DcitrP059375.1	DcitrP059375.1	ScVcwli_2425:374141-377179	45.2222	154.932	-1.2783	0.000102802	0.00964056	>DcitrP059375.1.1 ADP-ribosylation factor (AHRD V3.11 *** tr|A0A212EJE4|A0A212EJE4_DANPL). Similar to MCOT00334.0.CC XP_017297928.1. AED 0.31| InterPro:IPR006689,Pfam:PF00025| GO:0005525	GO:0007186//GO:0007264//GO:0006171//GO:0006000	G-protein coupled receptor signaling pathway//small GTPase mediated signal transduction//cAMP biosynthetic process//fructose metabolic process	--	--	GO:0003873//GO:0005525//GO:0005524//GO:0004016//GO:0031683//GO:0019001//GO:0004871//GO:0000287//GO:0003924	6-phosphofructo-2-kinase activity//GTP binding//ATP binding//adenylate cyclase activity//G-protein beta/gamma-subunit complex binding//guanyl nucleotide binding//signal transducer activity//magnesium ion binding//GTPase activity	K07937 ADP-ribosylation factor 1 | (RefSeq) ADP-ribosylation factor 1	http://www.genome.jp/dbget-bin/www_bget?api:100163116	DcitrP059375.1	ADP-ribosylation factor (AHRD V3.11 *** tr|A0A212EJE4|A0A212EJE4_DANPL). Similar to MCOT00334.0.CC XP_017297928.1. AED 0.31
DcitrP060640.1	DcitrP060640.1	ScVcwli_2457:804984-811001	4.83496	16.3901	-1.2808	0.000308215	0.022498	>DcitrP060640.1.1 CG16787-PA (AHRD V3.11 *** FBpp0072116). AED 0.23	GO:0009307	DNA restriction-modification system	--	--	GO:0009036//GO:0003677	Type II site-specific deoxyribonuclease activity//DNA binding	no KO assigned | (RefSeq) uncharacterized protein C6orf136 homolog	http://www.genome.jp/dbget-bin/www_bget?api:100159416	DcitrP060640.1	CG16787-PA (AHRD V3.11 *** FBpp0072116). AED 0.23
DcitrP064795.1	DcitrP064795.1	ScVcwli_2613:2051217-2062619	2.14814	7.52767	-1.29303	0.000486672	0.0301475	>DcitrP064795.1.1 Stathmin (AHRD V3.11 *** tr|A0A067RVS3|A0A067RVS3_ZOONE). Similar to MCOT04804.1.CO. AED 0.10| InterPro:IPR000956,Pfam:PF00836| GO:0031110	GO:0031110	regulation of microtubule polymerization or depolymerization	--	--	--	--	--	--	DcitrP064795.1	Stathmin (AHRD V3.11 *** tr|A0A1B6E1Z8|A0A1B6E1Z8_9HEMI). Similar to MCOT04804.1.CO XP_008468156.2. AED 0.13||Stathmin (AHRD V3.11 *** tr|A0A067RVS3|A0A067RVS3_ZOONE). Similar to MCOT04804.1.CO. AED 0.10
DcitrP051720.1	DcitrP051720.1	ScVcwli_2151:802487-814789	0.94544	3.34272	-1.29506	0.000905066	0.0465568	>DcitrP051720.1.1 Protein sex-lethal (AHRD V3.11 *-* tr|A0A154PIS8|A0A154PIS8_9HYME). Similar to MCOT06448.2.CC XP_008476189.1. AED 0.14	--	--	--	--	GO:0003676//GO:0003723	nucleic acid binding//RNA binding	K18747 protein sex-lethal | (RefSeq) Sxl; sex-lethal	http://www.genome.jp/dbget-bin/www_bget?api:100144777	DcitrP051720.1	Protein sex-lethal (AHRD V3.11 *-* tr|A0A154PIS8|A0A154PIS8_9HYME). Similar to MCOT06448.2.CC XP_008476189.1. AED 0.14
DcitrP041670.1	DcitrP041670.1	ScVcwli_1663:3460-25329	1.45179	5.27457	-1.30653	0.00015142	0.0130537	>DcitrP041670.1.1 PDZ and LIM domain protein (AHRD V3.11 *** tr|A0A2A3EA61|A0A2A3EA61_APICC). Similar to XP_008481050.1. AED 0.35	--	--	--	--	GO:0005515	protein binding	no KO assigned | (RefSeq) ZM-domain protein	http://www.genome.jp/dbget-bin/www_bget?api:100165963	DcitrP041670.1	PDZ and LIM domain protein (AHRD V3.11 *** tr|A0A2A3EA61|A0A2A3EA61_APICC). Similar to XP_008481058.1. AED 0.31||PDZ and LIM domain protein (AHRD V3.11 *** tr|A0A2A3EA61|A0A2A3EA61_APICC). Similar to XP_008481050.1. AED 0.35
DcitrP088465.1	DcitrP088465.1	ScVcwli_3448:579558-581558	10.0394	34.826	-1.30661	0.000139914	0.0123184	>DcitrP088465.1.1 39S ribosomal protein L30, mitochondrial (AHRD V3.11 *** tr|A0A1W4U568|A0A1W4U568_DROFC). Similar to MCOT05405.0.CC XP_008468269.1. AED 0.00	--	--	--	--	--	--	K02907 large subunit ribosomal protein L30 | (RefSeq) uncharacterized LOC100169174	http://www.genome.jp/dbget-bin/www_bget?api:100169174	DcitrP088465.1	39S ribosomal protein L30, mitochondrial (AHRD V3.11 *** tr|A0A1W4U568|A0A1W4U568_DROFC). Similar to MCOT05405.0.CC XP_008468269.1. AED 0.00
DcitrP028980.1	DcitrP028980.1	ScVcwli_1106:128182-131482	90.1204	330.502	-1.31788	1.78424e-05	0.00252848	>DcitrP028980.1.1 Myosin regulatory light chain sqh (AHRD V3.11 *** tr|A0A0A9Y7K4|A0A0A9Y7K4_LYGHE). Similar to MCOT20336.0.CC XP_017301966.1. AED 0.10	GO:0007165	signal transduction	GO:0005578	proteinaceous extracellular matrix	GO:0005509	calcium ion binding	K12757 myosin regulatory light chain 12 | (RefSeq) myosin regulatory light chain-like	http://www.genome.jp/dbget-bin/www_bget?api:100163913	DcitrP028980.1	Myosin regulatory light chain sqh (AHRD V3.11 *** tr|A0A0A9Y7K4|A0A0A9Y7K4_LYGHE). Similar to MCOT20336.0.CC XP_017301966.1. AED 0.21||Myosin regulatory light chain sqh (AHRD V3.11 *** tr|A0A0A9Y7K4|A0A0A9Y7K4_LYGHE). Similar to MCOT20336.0.CC XP_017301966.1. AED 0.14||Myosin regulatory light chain sqh (AHRD V3.11 *** tr|A0A0A9Y7K4|A0A0A9Y7K4_LYGHE). Similar to MCOT20336.0.CC XP_017301966.1. AED …
DcitrP089105.1	DcitrP089105.1	ScVcwli_3455:93810-181888	2.03422	7.20934	-1.32526	1.41421e-05	0.00210503	>DcitrP089105.1.1 AP complex subunit sigma (AHRD V3.11 *** tr|A0A069DNB1|A0A069DNB1_9HEMI). Similar to MCOT17189.1.CC XP_008478272.1. AED 0.35| InterPro:IPR022775,Pfam:PF01217	--	--	--	--	--	--	K12394 AP-1 complex subunit sigma 1/2 | (RefSeq) AP-1 complex subunit sigma-2	http://www.genome.jp/dbget-bin/www_bget?api:100166710	DcitrP089105.1	AP complex subunit sigma (AHRD V3.11 *** tr|A0A069DNB1|A0A069DNB1_9HEMI). Similar to MCOT17189.1.CC XP_008478272.1. AED 0.35
DcitrP048295.1	DcitrP048295.1	ScVcwli_1975:202060-235697	0.993359	3.48155	-1.32656	0.000308817	0.022498	>DcitrP048295.1.1 Unknown protein. AED 0.34	GO:0046008	regulation of female receptivity, post-mating	GO:0005576	extracellular region	GO:0005179//GO:0008270	hormone activity//zinc ion binding	K15442 tRNA-specific adenosine deaminase 3 | (RefSeq) probable inactive tRNA-specific adenosine deaminase-like protein 3	http://www.genome.jp/dbget-bin/www_bget?api:103311887	DcitrP048295.1	Unknown protein. AED 0.34
DcitrP066225.1	DcitrP066225.1	ScVcwli_2646:37021-40316	9.41833	32.1067	-1.33026	0.000460302	0.0290355	>DcitrP066225.1.1 Polyadenylate-binding protein (AHRD V3.11 *-* tr|A0A1W4XAT7|A0A1W4XAT7_AGRPL). Similar to MCOT06666.0.CC XP_017298234.1. AED 0.10	GO:0019835//GO:0007264//GO:0050829	cytolysis//small GTPase mediated signal transduction//defense response to Gram-negative bacterium	GO:0016021	integral component of membrane	GO:0005085//GO:0003676	guanyl-nucleotide exchange factor activity//nucleic acid binding	K13126 polyadenylate-binding protein | (RefSeq) polyadenylate-binding protein 4-like	http://www.genome.jp/dbget-bin/www_bget?api:100159585	DcitrP066225.1	Polyadenylate-binding protein (AHRD V3.11 *-* tr|A0A1W4XAT7|A0A1W4XAT7_AGRPL). Similar to MCOT06666.0.CC XP_017298234.1. AED 0.07||Polyadenylate-binding protein (AHRD V3.11 *-* tr|A0A1W4XAT7|A0A1W4XAT7_AGRPL). Similar to MCOT06666.0.CC XP_017298234.1. AED 0.10||Polyadenylate-binding protein (AHRD V3.11 *** tr|R4WE66|R4WE66_RIPPE). Similar to MCOT06666.0.CC XP_017298234.1. AED 0.11
DcitrP054300.1	DcitrP054300.1	ScVcwli_2195:800548-802701	87.2481	314.069	-1.33091	0.000101093	0.00955071	>DcitrP054300.1.1 single-pass membrane and coiled-coil domain-containing protein 4-like (AHRD V3.11 -** tr|A0A1W4XE78|A0A1W4XE78_AGRPL). AED 0.00| InterPro:IPR027960,Pfam:PF15012	GO:0051205	protein insertion into membrane	GO:0016021	integral component of membrane	GO:0004222	metalloendopeptidase activity	--	--	DcitrP054300.1	single-pass membrane and coiled-coil domain-containing protein 4-like (AHRD V3.11 -** tr|A0A1W4XE78|A0A1W4XE78_AGRPL). AED 0.00
DcitrP076175.1	DcitrP076175.1	ScVcwli_3118:73625-91969	23.439	83.1924	-1.3354	1.25531e-05	0.00193356	>DcitrP076175.1.1 Rab21-RA. (AHRD V3.11 *-* Ras-related protein Rab-1A tr|A0A0A9X3E1|A0A0A9X3E1_LYGHE). AED 0.25	GO:0007264//GO:0007165	small GTPase mediated signal transduction//signal transduction	--	--	GO:0003924//GO:0005524//GO:0016887//GO:0005525	GTPase activity//ATP binding//ATPase activity//GTP binding	K07874 Ras-related protein Rab-1A | (RefSeq) ras-related protein ORAB-1	http://www.genome.jp/dbget-bin/www_bget?api:100158710	DcitrP076175.1	Rab21-RA. (AHRD V3.11 *-* Ras-related protein Rab-1A tr|A0A0A9X3E1|A0A0A9X3E1_LYGHE). AED 0.25
DcitrP059420.1	DcitrP059420.1	ScVcwli_2425:288306-291312	19.4246	69.7722	-1.34391	0.000123754	0.0112117	>DcitrP059420.1.1 ADP-ribosylation factor (AHRD V3.11 *** tr|A0A212EJE4|A0A212EJE4_DANPL). Similar to MCOT00334.0.CC XP_017297928.1. AED 0.27| InterPro:IPR006689,Pfam:PF00025| GO:0005525	GO:0006000//GO:0006171//GO:0007264//GO:0007186	fructose metabolic process//cAMP biosynthetic process//small GTPase mediated signal transduction//G-protein coupled receptor signaling pathway	--	--	GO:0003924//GO:0000287//GO:0019001//GO:0004871//GO:0031683//GO:0004016//GO:0005524//GO:0005525//GO:0003873	GTPase activity//magnesium ion binding//guanyl nucleotide binding//signal transducer activity//G-protein beta/gamma-subunit complex binding//adenylate cyclase activity//ATP binding//GTP binding//6-phosphofructo-2-kinase activity	K07937 ADP-ribosylation factor 1 | (RefSeq) ADP-ribosylation factor 1	http://www.genome.jp/dbget-bin/www_bget?api:100163116	DcitrP059420.1	ADP-ribosylation factor (AHRD V3.11 *** tr|A0A212EJE4|A0A212EJE4_DANPL). Similar to MCOT00334.0.CC XP_017297928.1. AED 0.27
DcitrP067100.1	DcitrP067100.1	ScVcwli_2677:193496-233577	3.02098	10.8655	-1.34597	5.24376e-05	0.00577092	>DcitrP067100.1.1 AGAP011666-PA (AHRD V3.11 *** tr|Q5TMZ1|Q5TMZ1_ANOGA). Similar to MCOT19406.0.CO. AED 0.09	--	--	--	--	--	--	no KO assigned | (RefSeq) uncharacterized LOC100573056	http://www.genome.jp/dbget-bin/www_bget?api:100573056	DcitrP067100.1	AGAP011666-PA (AHRD V3.11 *** tr|Q5TMZ1|Q5TMZ1_ANOGA). Similar to MCOT19406.0.CO. AED 0.09
DcitrP097555.1	DcitrP097555.1	ScVcwli_3570:14153-63302	0.257726	0.962428	-1.35809	0.000463275	0.0291342	>DcitrP097555.1.1 CYP3172A partial-RA. (AHRD V3.11 *-* Protein sister of odd and bowel tr|A0A0L0BZG1|A0A0L0BZG1_LUCCU). Similar to MCOT12788.0.CC XP_017299049.1. AED 0.00	GO:0055114//GO:0006281	oxidation-reduction process//DNA repair	--	--	GO:0005515//GO:0008270//GO:0046872//GO:0016491	protein binding//zinc ion binding//metal ion binding//oxidoreductase activity	K09215 odd-skipped | (RefSeq) protein bowel	http://www.genome.jp/dbget-bin/www_bget?api:100167610	DcitrP097555.1	CYP3172A partial-RA. (AHRD V3.11 *-* Protein sister of odd and bowel tr|A0A0L0BZG1|A0A0L0BZG1_LUCCU). Similar to MCOT12788.0.CC XP_017299049.1. AED 0.00
DcitrP067055.1	DcitrP067055.1	ScVcwli_2677:78243-158980	0.901158	3.38531	-1.36272	0.000741675	0.0405777	>DcitrP067055.1.1 calcium uniporter protein, mitochondrial (AHRD V3.11 *** tr|A0A1W4WFI6|A0A1W4WFI6_AGRPL). Similar to MCOT01551.0.CO XP_008474250.1. AED 0.19| InterPro:IPR006769,Pfam:PF04678	GO:0048193	Golgi vesicle transport	GO:0016020	membrane	--	--	K20858 calcium uniporter protein, mitochondrial | (RefSeq) calcium uniporter protein, mitochondrial	http://www.genome.jp/dbget-bin/www_bget?api:100166457	DcitrP067055.1	calcium uniporter protein, mitochondrial (AHRD V3.11 *** tr|A0A1W4WFI6|A0A1W4WFI6_AGRPL). Similar to MCOT01551.0.CO XP_008474250.1. AED 0.19
DcitrP006565.1	DcitrP006565.1	ScVcwli_296:200058-223456	1.56384	5.61567	-1.3628	0.000261058	0.019931	>DcitrP006565.1.1 oral-facial-digital syndrome 1 protein homolog isoform X1 (AHRD V3.11 *-* tr|A0A1W4XJ99|A0A1W4XJ99_AGRPL). Similar to MCOT17124.1.CT. AED 0.01	GO:0006355	regulation of transcription, DNA-templated	--	--	GO:0003700//GO:0005515	transcription factor activity, sequence-specific DNA binding//protein binding	no KO assigned | (RefSeq) uncharacterized LOC100162417	http://www.genome.jp/dbget-bin/www_bget?api:100162417	DcitrP006565.1	oral-facial-digital syndrome 1 protein homolog isoform X1 (AHRD V3.11 *-* tr|A0A1W4XJ99|A0A1W4XJ99_AGRPL). Similar to MCOT17124.1.CT. AED 0.01
DcitrP074785.1	DcitrP074785.1	ScVcwli_3074:370442-372192	77.1161	278.472	-1.37757	8.99359e-06	0.00148862	>DcitrP074785.1.1 Stress-associated endoplasmic reticulum protein 2 (AHRD V3.11 *** tr|A0A067RA45|A0A067RA45_ZOONE). Similar to XP_008483442.1. AED 0.00| InterPro:IPR010580,Pfam:PF06624| GO:0005783	--	--	GO:0005783	endoplasmic reticulum	--	--	no KO assigned | (RefSeq) stress-associated endoplasmic reticulum protein 2	http://www.genome.jp/dbget-bin/www_bget?api:100161196	DcitrP074785.1	Stress-associated endoplasmic reticulum protein 2 (AHRD V3.11 *** tr|A0A067RA45|A0A067RA45_ZOONE). Similar to XP_008483442.1. AED 0.00
DcitrP021860.1	DcitrP021860.1	ScVcwli_910:520381-523218	13.3797	50.0293	-1.39307	3.84804e-05	0.00449808	>DcitrP021860.1.1 Synaptosomal-associated protein 29 (AHRD V3.11 *** tr|A0A154P0L9|A0A154P0L9_9HYME). Similar to MCOT21087.0.CT. AED 0.00	--	--	--	--	--	--	K08509 synaptosomal-associated protein 29 | (RefSeq) synaptosomal-associated protein 29-like	http://www.genome.jp/dbget-bin/www_bget?api:100164463	DcitrP021860.1	Synaptosomal-associated protein 29 (AHRD V3.11 *** tr|A0A154P0L9|A0A154P0L9_9HYME). Similar to MCOT21087.0.CT. AED 0.00
DcitrP033395.1	DcitrP033395.1	ScVcwli_1260:501003-530350	2.5819	9.56643	-1.39319	3.0408e-05	0.00379001	>DcitrP033395.1.1 Ral GTPase-activating protein subunit beta (AHRD V3.11 *** tr|A0A195FKP4|A0A195FKP4_9HYME). AED 0.29	GO:0051056//GO:0006075	regulation of small GTPase mediated signal transduction//(1->3)-beta-D-glucan biosynthetic process	GO:0000148//GO:0016020	1,3-beta-D-glucan synthase complex//membrane	GO:0008168//GO:0005096//GO:0003843	methyltransferase activity//GTPase activator activity//1,3-beta-D-glucan synthase activity	no KO assigned | (RefSeq) ral GTPase-activating protein subunit beta	http://www.genome.jp/dbget-bin/www_bget?api:100163659	DcitrP033395.1	Ral GTPase-activating protein subunit beta (AHRD V3.11 *** tr|A0A195FKP4|A0A195FKP4_9HYME). AED 0.29
DcitrP076270.1	DcitrP076270.1	ScVcwli_3118:342845-354899	6.29513	23.5868	-1.39518	7.24273e-05	0.00745533	>DcitrP076270.1.1 Exosome complex exonuclease RRP46 (AHRD V3.11 *** tr|B0XFZ4|B0XFZ4_CULQU). AED 0.39	--	--	--	--	--	--	K12590 exosome complex component RRP46 | (RefSeq) exosome complex component RRP46	http://www.genome.jp/dbget-bin/www_bget?api:100167827	DcitrP076270.1	Exosome complex exonuclease RRP46 (AHRD V3.11 *** tr|B0XFZ4|B0XFZ4_CULQU). AED 0.39
DcitrP090930.1	DcitrP090930.1	ScVcwli_3480:341142-347957	13.0833	48.9746	-1.39632	2.21051e-05	0.00302884	>DcitrP090930.1.1 1,2-dihydroxy-3-keto-5-methylthiopentene dioxygenase (AHRD V3.11 *** tr|A0A034WT85|A0A034WT85_BACDO). Similar to MCOT04957.0.CO XP_008474681.1. AED 0.28| InterPro:IPR004313,Pfam:PF03079| GO:0010309,GO:0055114	GO:0055114//GO:0006355	oxidation-reduction process//regulation of transcription, DNA-templated	--	--	GO:0045735//GO:0010309	nutrient reservoir activity//acireductone dioxygenase [iron(II)-requiring] activity	K08967 1,2-dihydroxy-3-keto-5-methylthiopentene dioxygenase [EC:1.13.11.53 1.13.11.54] | (RefSeq) acireductone dioxygenase-like	http://www.genome.jp/dbget-bin/www_bget?api:100161243	DcitrP090930.1	1,2-dihydroxy-3-keto-5-methylthiopentene dioxygenase (AHRD V3.11 *** tr|A0A034WT85|A0A034WT85_BACDO). Similar to MCOT04957.0.CO XP_008474681.1. AED 0.28
DcitrP088745.1	DcitrP088745.1	ScVcwli_3449:215654-222581	1.40385	5.27417	-1.39733	0.000413254	0.02723	>DcitrP088745.1.1 L-lactate dehydrogenase (AHRD V3.11 *-* tr|A0A182YBS7|A0A182YBS7_ANOST). Similar to MCOT19485.0.CT. AED 0.04| InterPro:IPR022383,Pfam:PF02866| GO:0016616,GO:0055114	GO:0055114	oxidation-reduction process	--	--	GO:0008641//GO:0016616//GO:0051287//GO:0016491	small protein activating enzyme activity//oxidoreductase activity, acting on the CH-OH group of donors, NAD or NADP as acceptor//NAD binding//oxidoreductase activity	--	--	DcitrP088745.1	L-lactate dehydrogenase (AHRD V3.11 *-* tr|A0A182YBS7|A0A182YBS7_ANOST). Similar to MCOT19485.0.CT. AED 0.04
DcitrP069555.1	DcitrP069555.1	ScVcwli_2807:19862-30523	2.34088	8.69697	-1.40338	3.19246e-05	0.00386158	>DcitrP069555.1.1 CYP307B partial-RA. (AHRD V3.11 *-* Cytochrome p450 tr|C1K313|C1K313_RETFL). AED 0.23	GO:0055114	oxidation-reduction process	--	--	GO:0005506//GO:0016705//GO:0020037	iron ion binding//oxidoreductase activity, acting on paired donors, with incorporation or reduction of molecular oxygen//heme binding	K14937 methyl farnesoate epoxidase / farnesoate epoxidase [EC:1.14.13.202 1.14.13.203] | (RefSeq) methyl farnesoate epoxidase-like	http://www.genome.jp/dbget-bin/www_bget?api:100162751	DcitrP069555.1	CYP307B partial-RA. (AHRD V3.11 *-* Cytochrome p450 tr|C1K313|C1K313_RETFL). AED 0.23
DcitrP066375.1	DcitrP066375.1	ScVcwli_2646:468953-471969	3.58283	13.8012	-1.41669	0.000240711	0.0186529	>DcitrP066375.1.1 Trafficking protein particle complex subunit 5 (AHRD V3.11 *** tr|A0A0J7KXI0|A0A0J7KXI0_LASNI). Similar to MCOT21157.0.CT XP_008468749.2. AED 0.12| InterPro:IPR007194,Pfam:PF04051	--	--	--	--	--	--	K20280 trafficking protein particle complex subunit 5 | (RefSeq) trafficking protein particle complex subunit 5-like	http://www.genome.jp/dbget-bin/www_bget?api:100160160	DcitrP066375.1	Trafficking protein particle complex subunit 5 (AHRD V3.11 *** tr|A0A0J7KXI0|A0A0J7KXI0_LASNI). Similar to MCOT21157.0.CT XP_008468749.2. AED 0.12
DcitrP067095.1	DcitrP067095.1	ScVcwli_2677:188010-191265	3.67645	14.089	-1.42245	0.000291391	0.0216866	>DcitrP067095.1.1 syntaxin-12 (AHRD V3.11 *** tr|A0A1W4WII0|A0A1W4WII0_AGRPL). Similar to MCOT23191.0.CC XP_008474253.1. AED 0.02	GO:0007165	signal transduction	GO:0016020//GO:0016021//GO:0005783	membrane//integral component of membrane//endoplasmic reticulum	GO:0005515//GO:0016758//GO:0004871//GO:0003677//GO:0008855	protein binding//transferase activity, transferring hexosyl groups//signal transducer activity//DNA binding//exodeoxyribonuclease VII activity	--	--	DcitrP067095.1	syntaxin-12 (AHRD V3.11 *** tr|A0A1W4WII0|A0A1W4WII0_AGRPL). Similar to MCOT23191.0.CC XP_008474253.1. AED 0.02
DcitrP032155.1	DcitrP032155.1	ScVcwli_1214:24554-38159	1.71516	6.76672	-1.42974	2.75185e-05	0.00349299	>DcitrP032155.1.1 mpv17 like protein-RA. (AHRD V3.11 *** Mpv17-like protein 2 tr|A0A067QZD0|A0A067QZD0_ZOONE). Similar to MCOT19556.0.CC XP_017301757.1. AED 0.02	--	--	GO:0016021	integral component of membrane	--	--	K13348 protein Mpv17 | (RefSeq) mpv17-like protein 2	http://www.genome.jp/dbget-bin/www_bget?api:103311237	DcitrP032155.1	mpv17 like protein-RA. (AHRD V3.11 *** Mpv17-like protein 2 tr|A0A067QZD0|A0A067QZD0_ZOONE). Similar to MCOT19556.0.CC XP_017301757.1. AED 0.02||mpv17 like protein-RB. (AHRD V3.11 *** Mpv17-like protein 2 tr|A0A067QZD0|A0A067QZD0_ZOONE). Similar to MCOT19556.0.CC XP_017301757.1. AED 0.07
DcitrP099870.1	DcitrP099870.1	ScVcwli_3596:414912-417620	4.05524	15.2895	-1.43178	0.000317177	0.0228655	>DcitrP099870.1.1 pasi2-PA (AHRD V3.11 *** FBpp0081495). AED 0.07	GO:0055114	oxidation-reduction process	GO:0016021	integral component of membrane	GO:0050661//GO:0008750	NADP binding//NAD(P)+ transhydrogenase (AB-specific) activity	no KO assigned | (RefSeq) uncharacterized LOC100159287	http://www.genome.jp/dbget-bin/www_bget?api:100159287	DcitrP099870.1	pasi2-PA (AHRD V3.11 *** FBpp0081495). AED 0.07
DcitrP044485.1	DcitrP044485.1	ScVcwli_1805:44629-77061	0.54517	2.06091	-1.44434	0.000960398	0.0490633	>DcitrP044485.1.1 Histone H2B (AHRD V3.11 *-* tr|K7J775|K7J775_NASVI). AED 0.12| InterPro:IPR007125,Pfam:PF00125| GO:0003677	GO:0006352//GO:0000160	DNA-templated transcription, initiation//phosphorelay signal transduction system	GO:0005669//GO:0016021//GO:0005783	transcription factor TFIID complex//integral component of membrane//endoplasmic reticulum	GO:0003677//GO:0000155	DNA binding//phosphorelay sensor kinase activity	K11252 histone H2B | (RefSeq) histone H2B-like	http://www.genome.jp/dbget-bin/www_bget?api:100573886	DcitrP044485.1	Histone H2B (AHRD V3.11 *-* tr|K7J775|K7J775_NASVI). AED 0.12
DcitrP031855.1	DcitrP031855.1	ScVcwli_1195:88936-114108	1.06931	4.18857	-1.44462	0.000112699	0.0104563	>DcitrP031855.1.1 Mps one binder kinase activator (AHRD V3.11 *-* tr|A0A2A3ENR1|A0A2A3ENR1_APICC). AED 0.09| InterPro:IPR001873,Pfam:PF00858| GO:0005272,GO:0006814,GO:0016020	GO:0006814	sodium ion transport	GO:0016020	membrane	GO:0005272	sodium channel activity	no KO assigned | (RefSeq) MOB kinase activator-like 3	http://www.genome.jp/dbget-bin/www_bget?api:100159681	DcitrP031855.1	Mps one binder kinase activator (AHRD V3.11 *-* tr|A0A2A3ENR1|A0A2A3ENR1_APICC). AED 0.09
DcitrP080605.1	DcitrP080605.1	ScVcwli_3312:198663-201158	4.27667	17.1803	-1.45298	0.000479578	0.0298295	>DcitrP080605.1.1 Ubiquitin-conjugating enzyme E2 J2 (AHRD V3.11 *** tr|A0A067R6N3|A0A067R6N3_ZOONE). Similar to MCOT21130.0.CC XP_017300165.1. AED 0.27	GO:0006396	RNA processing	--	--	GO:0004526	ribonuclease P activity	K04554 ubiquitin-conjugating enzyme E2 J2 [EC:2.3.2.23] | (RefSeq) ubiquitin-conjugating enzyme E2 j2-like	http://www.genome.jp/dbget-bin/www_bget?api:100162000	DcitrP080605.1	Ubiquitin-conjugating enzyme E2 J2 (AHRD V3.11 *** tr|A0A067R6N3|A0A067R6N3_ZOONE). Similar to MCOT21130.0.CC XP_017300165.1. AED 0.27
DcitrP007880.1	DcitrP007880.1	ScVcwli_357:202805-204533	32.6282	125.159	-1.45423	5.10039e-06	0.000950694	>DcitrP007880.1.1 Proteasome activator complex subunit 3 (AHRD V3.11 *** tr|A0A067QLS9|A0A067QLS9_ZOONE). Similar to MCOT08653.0.MM XP_008469785.1. AED 0.74| InterPro:IPR003186,Pfam:PF02252| GO:0008537	--	--	GO:0008537	proteasome activator complex	--	--	K06698 proteasome activator subunit 3 (PA28 gamma) | (RefSeq) proteasome activator complex subunit 3	http://www.genome.jp/dbget-bin/www_bget?api:100169004	DcitrP007880.1	Proteasome activator complex subunit 3 (AHRD V3.11 *** tr|A0A067QLS9|A0A067QLS9_ZOONE). Similar to MCOT08653.0.MM XP_008469785.1. AED 0.74
DcitrP047245.1	DcitrP047245.1	ScVcwli_1928:1898972-1911127	0.581233	2.25421	-1.45495	0.000358458	0.0251647	>DcitrP047245.1.1 E3 ubiquitin-protein ligase RING2 (AHRD V3.11 *-* tr|A0A146M3B0|A0A146M3B0_LYGHE). AED 0.24	--	--	--	--	GO:0005515//GO:0046872//GO:0008270	protein binding//metal ion binding//zinc ion binding	K10695 E3 ubiquitin-protein ligase RNF1/2 [EC:2.3.2.27] | (RefSeq) E3 ubiquitin-protein ligase RING1-like	http://www.genome.jp/dbget-bin/www_bget?api:100165353	DcitrP047245.1	E3 ubiquitin-protein ligase RING2 (AHRD V3.11 *-* tr|A0A146M3B0|A0A146M3B0_LYGHE). AED 0.24
DcitrP025180.1	DcitrP025180.1	ScVcwli_1002:510775-548555	3.05372	11.5952	-1.45684	0.000824981	0.0434755	>DcitrP025180.1.1 Glutamine synthetase (AHRD V3.11 *** tr|A0A1I9WLM6|A0A1I9WLM6_NILLU). Similar to MCOT18540.1.CT. AED 0.22	GO:0006542//GO:0006807	glutamine biosynthetic process//nitrogen compound metabolic process	--	--	GO:0004356	glutamate-ammonia ligase activity	K01915 glutamine synthetase [EC:6.3.1.2] | (RefSeq) Gs2; glutamine synthetase 2	http://www.genome.jp/dbget-bin/www_bget?api:100160139	DcitrP025180.1	Glutamine synthetase (AHRD V3.11 *** tr|A0A1I9WLM6|A0A1I9WLM6_NILLU). Similar to MCOT18540.1.CT. AED 0.21||Glutamine synthetase (AHRD V3.11 *** tr|A0A1I9WLM6|A0A1I9WLM6_NILLU). Similar to MCOT18540.1.CT. AED 0.22||Glutamine synthetase (AHRD V3.11 *** tr|A0A1I9WLM6|A0A1I9WLM6_NILLU). Similar to MCOT18540.1.CT. AED 0.19
DcitrP099580.1	DcitrP099580.1	ScVcwli_3595:3196077-3200144	1.68649	6.67133	-1.46433	0.000906833	0.0465568	>DcitrP099580.1.1 Josephin protein (AHRD V3.11 *** tr|A0A212FCE5|A0A212FCE5_DANPL). Similar to MCOT15639.0.CC XP_008471721.1. AED 0.08| InterPro:IPR006155,Pfam:PF02099| GO:0004843,GO:0016579	--	--	--	--	GO:0008242	omega peptidase activity	K15235 josephin [EC:3.4.19.12] | (RefSeq) josephin-2	http://www.genome.jp/dbget-bin/www_bget?api:100167209	DcitrP099580.1	Josephin protein (AHRD V3.11 *** tr|A0A212FCE5|A0A212FCE5_DANPL). Similar to MCOT15639.0.CC XP_008471721.1. AED 0.08
DcitrP089065.1	DcitrP089065.1	ScVcwli_3455:66054-75929	1.71493	6.60906	-1.47064	3.21313e-05	0.00386158	>DcitrP089065.1.1 CG12567 (AHRD V3.11 *** tr|A0A0M4EEG0|A0A0M4EEG0_DROBS). Similar to MCOT16924.0.CT. AED 0.00	--	--	--	--	GO:0016787	hydrolase activity	no KO assigned | (RefSeq) uncharacterized protein YJR142W	http://www.genome.jp/dbget-bin/www_bget?api:100164623	DcitrP089065.1	CG12567 (AHRD V3.11 *** tr|A0A0M4EEG0|A0A0M4EEG0_DROBS). Similar to MCOT16924.0.CT. AED 0.00
XLOC_021601	XLOC_021601	ScVcwli_3379:9110-14252	2.57213	10.1056	-1.47471	4.49716e-05	0.00505686		--	--	--	--	--	--	--	--	--	--
DcitrP068430.1	DcitrP068430.1	ScVcwli_2739:607278-610170	3.29111	12.9949	-1.48915	0.000536885	0.0322911	>DcitrP068430.1.1 Polyadenylate-binding protein-interacting protein 2B (AHRD V3.11 --* tr|A0A067RLF0|A0A067RLF0_ZOONE). Similar to MCOT05099.2.CC XP_008469164.1. AED 0.00	GO:0009405	pathogenesis	--	--	GO:0005198	structural molecule activity	--	--	DcitrP068430.1	Polyadenylate-binding protein-interacting protein 2B (AHRD V3.11 --* tr|A0A067RLF0|A0A067RLF0_ZOONE). Similar to MCOT05099.2.CC XP_008469164.1. AED 0.00
DcitrP033725.1	DcitrP033725.1	ScVcwli_1279:38437-40297	3.11629	12.3291	-1.49508	0.000543043	0.0324727	>DcitrP033725.1.1 Protein unc-119-like protein (AHRD V3.11 *** tr|A0A034V0C4|A0A034V0C4_BACDO). Similar to MCOT13256.0.CC XP_008474932.1. AED 0.00| InterPro:IPR008015,Pfam:PF05351	--	--	--	--	--	--	no KO assigned | (RefSeq) protein unc-119 homolog B	http://www.genome.jp/dbget-bin/www_bget?api:100165426	DcitrP033725.1	Protein unc-119-like protein (AHRD V3.11 *** tr|A0A034V0C4|A0A034V0C4_BACDO). Similar to MCOT13256.0.CC XP_008474932.1. AED 0.00
DcitrP052215.1	DcitrP052215.1	ScVcwli_2161:1242627-1243325	12.3172	49.4754	-1.505	0.000102976	0.00964056	>DcitrP052215.1.1 NAD(P)H-hydrate epimerase (AHRD V3.11 *** tr|A0A0J7KYL4|A0A0J7KYL4_LASNI). Similar to MCOT21849.3.CO. AED 0.25| InterPro:IPR004443,Pfam:PF03853	--	--	--	--	--	--	K17759 NAD(P)H-hydrate epimerase [EC:5.1.99.6] | (RefSeq) yjeF N-terminal domain-containing protein GF19489-like	http://www.genome.jp/dbget-bin/www_bget?api:100165916	DcitrP052215.1	NAD(P)H-hydrate epimerase (AHRD V3.11 *** tr|A0A0J7KYL4|A0A0J7KYL4_LASNI). Similar to MCOT21849.3.CO. AED 0.25
DcitrP056685.1	DcitrP056685.1	ScVcwli_2275:353622-362164	16.8296	67.0309	-1.50561	1.70864e-06	0.000410628	>DcitrP056685.1.1 Sequestosome-1 (AHRD V3.11 *-* tr|A0A067RF16|A0A067RF16_ZOONE). Similar to MCOT12726.0.CT. AED 0.01	GO:0055114	oxidation-reduction process	--	--	GO:0005515//GO:0008270//GO:0047134	protein binding//zinc ion binding//protein-disulfide reductase activity	no KO assigned | (RefSeq) Kcmf1; potassium channel modulatory factor 1	http://www.genome.jp/dbget-bin/www_bget?api:100169521	DcitrP056685.1	Sequestosome-1 (AHRD V3.11 *-* tr|A0A067RF16|A0A067RF16_ZOONE). Similar to MCOT12726.0.CT. AED 0.01
DcitrP068580.1	DcitrP068580.1	ScVcwli_2739:1151486-1152094	10.8	43.9112	-1.50571	0.000313389	0.0226714	>DcitrP068580.1.1 Cell death activator CIDE-B (AHRD V3.11 *** tr|E2A1G4|E2A1G4_CAMFO). Similar to MCOT00606.0.CC XP_008467808.1. AED 0.34	GO:0006915	apoptotic process	GO:0005622	intracellular	--	--	K02310 DNA fragmentation factor, 45 kD, alpha subunit | (RefSeq) DNA fragmentation factor subunit alpha	http://www.genome.jp/dbget-bin/www_bget?api:100160510	DcitrP068580.1	Cell death activator CIDE-B (AHRD V3.11 *** tr|E2A1G4|E2A1G4_CAMFO). Similar to MCOT00606.0.CC XP_008467808.1. AED 0.34
DcitrP099170.1	DcitrP099170.1	ScVcwli_3595:1474520-1477921	5.03651	20.5452	-1.5083	6.91944e-05	0.00723047	>DcitrP099170.1.1 Mitochondrial pyruvate carrier (AHRD V3.11 *** tr|H9IY92|H9IY92_BOMMO). Similar to MCOT05241.1.CO. AED 0.02| InterPro:IPR005336,Pfam:PF03650| GO:0005743,GO:0006850	GO:0006850	mitochondrial pyruvate transport	GO:0005743	mitochondrial inner membrane	--	--	no KO assigned | (RefSeq) brain protein 44-like	http://www.genome.jp/dbget-bin/www_bget?api:100167201	DcitrP099170.1	Mitochondrial pyruvate carrier (AHRD V3.11 *** tr|H9IY92|H9IY92_BOMMO). Similar to MCOT05241.1.CO. AED 0.02
DcitrP046565.1	DcitrP046565.1	ScVcwli_1917:205390-206352	6.89949	27.6297	-1.52885	0.000238635	0.0185741	>DcitrP046565.1.1 Anaphase-promoting complex subunit CDC26 (AHRD V3.11 --* tr|A0A067R846|A0A067R846_ZOONE). AED 0.00	GO:0031145//GO:0030071	anaphase-promoting complex-dependent proteasomal ubiquitin-dependent protein catabolic process//regulation of mitotic metaphase/anaphase transition	GO:0005680	anaphase-promoting complex	--	--	--	--	DcitrP046565.1	Anaphase-promoting complex subunit CDC26 (AHRD V3.11 --* tr|A0A067R846|A0A067R846_ZOONE). AED 0.00
DcitrP076125.1	DcitrP076125.1	ScVcwli_3118:155209-157223	22.673	92.1169	-1.53118	2.47284e-05	0.00317783	>DcitrP076125.1.1 Ras-related protein Rab-1A (AHRD V3.11 *** tr|E2BZ06|E2BZ06_HARSA). AED 0.49| InterPro:IPR001806,Pfam:PF00071| GO:0003924,GO:0005525	GO:0007264//GO:0006576	small GTPase mediated signal transduction//cellular biogenic amine metabolic process	--	--	GO:0003924//GO:0005524//GO:0005525//GO:0016887	GTPase activity//ATP binding//GTP binding//ATPase activity	K07874 Ras-related protein Rab-1A | (RefSeq) ras-related protein ORAB-1	http://www.genome.jp/dbget-bin/www_bget?api:100158710	DcitrP076125.1	Ras-related protein Rab-1A (AHRD V3.11 *** tr|E2BZ06|E2BZ06_HARSA). AED 0.49
DcitrP034940.1	DcitrP034940.1	ScVcwli_1319:2696736-2752203	0.630628	2.7511	-1.53396	0.000681019	0.0378771	>DcitrP034940.1.1 Cttnbp2 n-terminal-like protein (AHRD V3.11 *** tr|A0A0J7KS36|A0A0J7KS36_LASNI). Similar to MCOT22950.0.CT. AED 0.31	GO:0009405//GO:0005975	pathogenesis//carbohydrate metabolic process	GO:0016021	integral component of membrane	GO:0004649	poly(ADP-ribose) glycohydrolase activity	no KO assigned | (RefSeq) uncharacterized protein CG10915	http://www.genome.jp/dbget-bin/www_bget?api:100165163	DcitrP034940.1	CTTNBP2 N-terminal-like protein (AHRD V3.11 *** tr|E2A0A3|E2A0A3_CAMFO). Similar to MCOT22950.0.CT. AED 0.30||Cttnbp2 n-terminal-like protein (AHRD V3.11 *** tr|A0A0J7KS36|A0A0J7KS36_LASNI). Similar to MCOT22950.0.CT. AED 0.41||Cttnbp2 n-terminal-like protein (AHRD V3.11 *** tr|A0A0J7KS36|A0A0J7KS36_LASNI). Similar to MCOT22950.0.CT. AED 0.31
DcitrP068315.1	DcitrP068315.1	ScVcwli_2726:148319-150694	10.5873	44.4447	-1.54407	1.50121e-05	0.00217203	>DcitrP068315.1.1 Hig1 domain family member 1a (AHRD V3.11 *** tr|A0A0J7K615|A0A0J7K615_LASNI). AED 0.00| InterPro:IPR007667,Pfam:PF04588	--	--	--	--	--	--	no KO assigned | (RefSeq) HIG1 domain family member 1C	http://www.genome.jp/dbget-bin/www_bget?api:100574047	DcitrP068315.1	Hig1 domain family member 1a (AHRD V3.11 *** tr|A0A0J7K615|A0A0J7K615_LASNI). AED 0.00
DcitrP095005.1	DcitrP095005.1	ScVcwli_3532:96836-97556	13.6634	55.6092	-1.54493	4.27719e-05	0.00486237	>DcitrP095005.1.1 Anaphase-promoting complex subunit CDC26 (AHRD V3.11 *** tr|A0A067R846|A0A067R846_ZOONE). AED 0.35	GO:0030071//GO:0031145//GO:0006355	regulation of mitotic metaphase/anaphase transition//anaphase-promoting complex-dependent proteasomal ubiquitin-dependent protein catabolic process//regulation of transcription, DNA-templated	GO:0005680	anaphase-promoting complex	--	--	--	--	DcitrP095005.1	Anaphase-promoting complex subunit CDC26 (AHRD V3.11 *** tr|A0A067R846|A0A067R846_ZOONE). AED 0.35
DcitrP015560.1	DcitrP015560.1	ScVcwli_620:2320529-2331650	12.3825	50.8808	-1.54546	4.70672e-07	0.000129843	>DcitrP015560.1.1 Profilin (AHRD V3.11 *** tr|A0A067QYW4|A0A067QYW4_ZOONE). Similar to MCOT09759.0.TT. AED 0.07| InterPro:IPR005455,Pfam:PF00235	--	--	--	--	--	--	K05759 profilin | (RefSeq) profilin-like	http://www.genome.jp/dbget-bin/www_bget?api:100160884	DcitrP015560.1	Profilin (AHRD V3.11 *** tr|A0A067QYW4|A0A067QYW4_ZOONE). Similar to MCOT09759.0.TT. AED 0.07
DcitrP018855.1	DcitrP018855.1	ScVcwli_801:387084-388472	5.04531	21.1601	-1.56371	0.000162397	0.0138272	>DcitrP018855.1.1 zinc finger CCCH domain-containing protein 11A-like (AHRD V3.11 *-* tr|A0A1W4WPD2|A0A1W4WPD2_AGRPL). Similar to MCOT00940.0.CC XP_008469473.1. AED 0.18,Pfam:PF15663	GO:0007018	microtubule-based movement	GO:0005868	cytoplasmic dynein complex	--	--	no KO assigned | (RefSeq) zinc finger CCCH domain-containing protein 11A-like	http://www.genome.jp/dbget-bin/www_bget?api:100166667	DcitrP018855.1	zinc finger CCCH domain-containing protein 11A-like (AHRD V3.11 *-* tr|A0A1W4WPD2|A0A1W4WPD2_AGRPL). Similar to MCOT00940.0.CC XP_008469473.1. AED 0.18
DcitrP015400.1	DcitrP015400.1	ScVcwli_620:1223735-1227067	4.37631	18.1868	-1.56795	2.30837e-05	0.00305814	>DcitrP015400.1.1 Vacuolar protein sorting-associated protein 53 (AHRD V3.11 *** tr|A0A0A9XAK6|A0A0A9XAK6_LYGHE). Similar to MCOT22270.0.CC XP_008487944.1. AED 0.00	GO:0009405//GO:0046903//GO:0006891	pathogenesis//secretion//intra-Golgi vesicle-mediated transport	GO:0019867//GO:0017119	outer membrane//Golgi transport complex	GO:0003677	DNA binding	K20299 vacuolar protein sorting-associated protein 53 | (RefSeq) vacuolar protein sorting-associated protein 53 homolog	http://www.genome.jp/dbget-bin/www_bget?api:100159644	DcitrP015400.1	Vacuolar protein sorting-associated protein 53 (AHRD V3.11 *** tr|A0A0A9XAK6|A0A0A9XAK6_LYGHE). Similar to MCOT22270.0.CC XP_008487944.1. AED 0.00
DcitrP000180.1	DcitrP000180.1	ScVcwli_12:185476-186404	6.33047	26.7003	-1.57493	0.000854478	0.0443602	>DcitrP000180.1.1 UPF0389 protein CG9231 (AHRD V3.11 *** tr|A0A1W4URC7|A0A1W4URC7_DROFC). Similar to MCOT04601.0.CC XP_008476248.1. AED 0.21| InterPro:IPR009432,Pfam:PF06388	--	--	GO:0016020	membrane	GO:0016798	hydrolase activity, acting on glycosyl bonds	no KO assigned | (RefSeq) UPF0389 protein GA21628-like	http://www.genome.jp/dbget-bin/www_bget?api:100166014	DcitrP000180.1	UPF0389 protein CG9231 (AHRD V3.11 *** tr|A0A1W4URC7|A0A1W4URC7_DROFC). Similar to MCOT04601.0.CC XP_008476248.1. AED 0.21||UPF0389 protein CG9231 (AHRD V3.11 *** tr|A0A1W4URC7|A0A1W4URC7_DROFC). Similar to MCOT04601.0.CC XP_008476248.1. AED 0.16
DcitrP095945.1	DcitrP095945.1	ScVcwli_3539:1962359-1968431	2.04732	8.7902	-1.59528	2.40844e-05	0.00311442	>DcitrP095945.1.1 Nischarin (AHRD V3.11 *** tr|A0A067QG80|A0A067QG80_ZOONE). Similar to MCOT00313.0.CC XP_008469799.1. AED 0.00	--	--	--	--	GO:0005515//GO:0035091	protein binding//phosphatidylinositol binding	no KO assigned | (RefSeq) nischarin	http://www.genome.jp/dbget-bin/www_bget?api:100165664	DcitrP095945.1	Nischarin (AHRD V3.11 *** tr|A0A067QG80|A0A067QG80_ZOONE). Similar to MCOT00313.0.CC XP_008469799.1. AED 0.00
DcitrP032745.1	DcitrP032745.1	ScVcwli_1234:122552-124732	9.61362	40.5801	-1.60256	2.45825e-06	0.000535382	>DcitrP032745.1.1 NTF2-related export protein (AHRD V3.11 *** tr|A0A1W4WTG9|A0A1W4WTG9_AGRPL). Similar to MCOT07487.0.MT. AED 0.41| InterPro:IPR002075,Pfam:PF02136| GO:0005622,GO:0006810	GO:0006810	transport	GO:0005622	intracellular	GO:0016787	hydrolase activity	--	--	DcitrP032745.1	NTF2-related export protein (AHRD V3.11 *** tr|A0A1W4WTG9|A0A1W4WTG9_AGRPL). Similar to MCOT07487.0.MT. AED 0.41
DcitrP078780.1	DcitrP078780.1	ScVcwli_3233:50604-52119	9.24386	38.8489	-1.60326	1.0837e-05	0.00172475	>DcitrP078780.1.1 Alpha N-terminal protein methyltransferase 1 (AHRD V3.11 *** tr|A0A194PMA8|A0A194PMA8_PAPXU). Similar to MCOT06414.3.CC XP_008473876.1. AED 0.00| InterPro:IPR008576,Pfam:PF05891| GO:0006480,GO:0008168	GO:0006364//GO:0008152//GO:0006480	rRNA processing//metabolic process//N-terminal protein amino acid methylation	GO:0005737	cytoplasm	GO:0008649//GO:0008171//GO:0008168	rRNA methyltransferase activity//O-methyltransferase activity//methyltransferase activity	K16219 protein N-terminal methyltransferase [EC:2.1.1.244] | (RefSeq) Mettl11a; methyltransferase like 11A	http://www.genome.jp/dbget-bin/www_bget?api:100167499	DcitrP078780.1	Alpha N-terminal protein methyltransferase 1 (AHRD V3.11 *** tr|A0A194PMA8|A0A194PMA8_PAPXU). Similar to MCOT06414.3.CC XP_008473876.1. AED 0.00
DcitrP073540.1	DcitrP073540.1	ScVcwli_2991:39313-40953	3.82349	16.2201	-1.60496	0.000179684	0.0148685	>DcitrP073540.1.1 Protein LSM12 (AHRD V3.11 *-* tr|A0A0A9Z6Z7|A0A0A9Z6Z7_LYGHE). AED 0.04	--	--	--	--	--	--	no KO assigned | (RefSeq) uncharacterized protein LOC100163468	http://www.genome.jp/dbget-bin/www_bget?api:100163468	DcitrP073540.1	Protein LSM12 (AHRD V3.11 *-* tr|A0A0A9Z6Z7|A0A0A9Z6Z7_LYGHE). AED 0.04
DcitrP076275.1	DcitrP076275.1	ScVcwli_3118:348407-352147	4.9401	21.2792	-1.60558	3.39999e-06	0.000713059	>DcitrP076275.1.1 Zinc finger protein, putative (AHRD V3.11 *-* tr|E0VXU7|E0VXU7_PEDHC). Similar to MCOT01637.0.CO XP_008488171.2. AED 0.00	--	--	GO:0005634	nucleus	GO:0008270	zinc ion binding	no KO assigned | (RefSeq) uncharacterized LOC100572992	http://www.genome.jp/dbget-bin/www_bget?api:100572992	DcitrP076275.1	Zinc finger protein, putative (AHRD V3.11 *-* tr|E0VXU7|E0VXU7_PEDHC). Similar to MCOT01637.0.CO XP_008488171.2. AED 0.00
DcitrP035245.1	DcitrP035245.1	ScVcwli_1324:159326-177653	1.53934	6.58742	-1.62703	2.27283e-05	0.00305357	>DcitrP035245.1.1 Protein transport protein Sec16B (AHRD V3.11 *-* tr|A0A146KRB5|A0A146KRB5_LYGHE). AED 0.06	GO:0035556	intracellular signal transduction	GO:0016021//GO:0005739//GO:0009279	integral component of membrane//mitochondrion//cell outer membrane	GO:0016820	hydrolase activity, acting on acid anhydrides, catalyzing transmembrane movement of substances	K20353 COPII coat assembly protein SEC16 | (RefSeq) protein transport protein Sec16B	http://www.genome.jp/dbget-bin/www_bget?api:100166129	DcitrP035245.1	Protein transport protein Sec16B (AHRD V3.11 *-* tr|A0A146KRB5|A0A146KRB5_LYGHE). AED 0.06
DcitrP057255.1	DcitrP057255.1	ScVcwli_2307:270953-280269	2.87848	12.6884	-1.63581	1.04796e-06	0.000264418	>DcitrP057255.1.1 Zinc finger protein sens (AHRD V3.11 *** tr|A0A146KX59|A0A146KX59_LYGHE). Similar to MCOT06000.1.CC XP_017304750.1. AED 0.01	GO:0007155//GO:0019062//GO:0006464//GO:0006351//GO:0035556//GO:0009405	cell adhesion//virion attachment to host cell//cellular protein modification process//transcription, DNA-templated//intracellular signal transduction//pathogenesis	--	--	GO:0004519//GO:0003676//GO:0046872//GO:0008270//GO:0003677//GO:0016151	endonuclease activity//nucleic acid binding//metal ion binding//zinc ion binding//DNA binding//nickel cation binding	K09223 growth factor independent 1 | (RefSeq) zinc finger protein 683	http://www.genome.jp/dbget-bin/www_bget?api:100167346	DcitrP057255.1	Zinc finger protein sens (AHRD V3.11 *** tr|A0A146KX59|A0A146KX59_LYGHE). Similar to MCOT06000.1.CC XP_017304750.1. AED 0.01||Zinc finger protein sens (AHRD V3.11 *** tr|A0A146KX59|A0A146KX59_LYGHE). Similar to MCOT06000.1.CC XP_017304750.1. AED 0.00
DcitrP053560.1	DcitrP053560.1	ScVcwli_2175:2099124-2104762	1.17331	5.13253	-1.63647	0.000353772	0.025067	>DcitrP053560.1.1 Hexosyltransferase (AHRD V3.11 *** tr|J9K2F5|J9K2F5_ACYPI). Similar to MCOT17355.0.CC XP_008470733.1. AED 0.32| InterPro:IPR008428,Pfam:PF05679| GO:0008376,GO:0032580	--	--	GO:0016020//GO:0032580	membrane//Golgi cisterna membrane	GO:0008376//GO:0016757	acetylgalactosaminyltransferase activity//transferase activity, transferring glycosyl groups	K00747 chondroitin polymerizing factor [EC:2.4.1.175 2.4.1.226] | (RefSeq) chondroitin sulfate synthase 2	http://www.genome.jp/dbget-bin/www_bget?api:100166045	DcitrP053560.1	Hexosyltransferase (AHRD V3.11 *** tr|J9K2F5|J9K2F5_ACYPI). Similar to MCOT17355.0.CC XP_008470733.1. AED 0.32
DcitrP005715.1	DcitrP005715.1	ScVcwli_273:434605-443245	0.467349	2.0613	-1.63922	0.000536299	0.0322911	>DcitrP005715.1.1 Unknown protein. Similar to XP_017300265.1. AED 0.04	GO:0006810	transport	GO:0016020	membrane	GO:0005515//GO:0005215	protein binding//transporter activity	no KO assigned | (RefSeq) uncharacterized LOC100570989	http://www.genome.jp/dbget-bin/www_bget?api:100570989	DcitrP005715.1	Unknown protein. Similar to XP_017300265.1. AED 0.04
DcitrP069550.1	DcitrP069550.1	ScVcwli_2807:12381-19262	0.985155	4.36158	-1.64022	0.000145358	0.0126364	>DcitrP069550.1.1 Unknown protein. Similar to MCOT12141.2.CO XP_017303631.1. AED 0.00	GO:0055085//GO:0030001	transmembrane transport//metal ion transport	GO:0005634//GO:0016020//GO:0005615	nucleus//membrane//extracellular space	GO:0005186//GO:0046873	pheromone activity//metal ion transmembrane transporter activity	--	--	DcitrP069550.1	Unknown protein. Similar to MCOT12141.2.CO XP_017303631.1. AED 0.00
DcitrP034470.1	DcitrP034470.1	ScVcwli_1319:292626-303802	9.60247	43.0483	-1.65565	2.17817e-07	6.82822e-05	>DcitrP034470.1.1 Sorting nexin-12 (AHRD V3.11 *** tr|A0A0A9X9Y5|A0A0A9X9Y5_LYGHE). AED 0.18	--	--	GO:0005622	intracellular	GO:0003779//GO:0035091	actin binding//phosphatidylinositol binding	K17918 sorting nexin-3/12 | (RefSeq) sorting nexin-like	http://www.genome.jp/dbget-bin/www_bget?api:100165609	DcitrP034470.1	Sorting nexin-12 (AHRD V3.11 *** tr|A0A0A9X9Y5|A0A0A9X9Y5_LYGHE). AED 0.18
DcitrP088685.1	DcitrP088685.1	ScVcwli_3449:105678-108908	2.62685	11.7125	-1.67242	0.000128401	0.0114509	>DcitrP088685.1.1 Rab 3-RA. (AHRD V3.11 *** Ras-related protein rab-7a tr|A0A0J7L9F0|A0A0J7L9F0_LASNI). Similar to MCOT07680.0.MT. AED 0.43| InterPro:IPR001806,Pfam:PF00071| GO:0003924,GO:0005525>DcitrP088685.1.1 Rab 3-RA. (AHRD V3.11 *** Ras-related protein rab-7a tr|A0A0J7L9F0|A0A0J7L9F0_LASNI). Similar to MCOT07680.0.MT. AED 0.43| InterPro:IPR001806,Pfam:PF00071| GO:0003924,GO:0005525>DcitrP08…	GO:0007186//GO:0006576//GO:0007264	G-protein coupled receptor signaling pathway//cellular biogenic amine metabolic process//small GTPase mediated signal transduction	--	--	GO:0031683//GO:0019001//GO:0004871//GO:0003924//GO:0005525//GO:0005524	G-protein beta/gamma-subunit complex binding//guanyl nucleotide binding//signal transducer activity//GTPase activity//GTP binding//ATP binding	K07897 Ras-related protein Rab-7A | (RefSeq) ras-related protein Rab-7-like	http://www.genome.jp/dbget-bin/www_bget?api:100161383	DcitrP088685.1	Rab 3-RA. (AHRD V3.11 *** Ras-related protein rab-7a tr|A0A0J7L9F0|A0A0J7L9F0_LASNI). Similar to MCOT07680.0.MT. AED 0.43
DcitrP054700.1	DcitrP054700.1	ScVcwli_2203:33347-43503	1.36068	6.00962	-1.67277	1.14396e-05	0.00180676	>DcitrP054700.1.1 Protein KTI12 (AHRD V3.11 *** tr|A0A0A9VUI6|A0A0A9VUI6_LYGHE). Similar to MCOT14679.0.CC XP_008473337.1. AED 0.00| InterPro:IPR013641,Pfam:PF08433	GO:0006000//GO:0000103	fructose metabolic process//sulfate assimilation	--	--	GO:0003873//GO:0004020//GO:0005524	6-phosphofructo-2-kinase activity//adenylylsulfate kinase activity//ATP binding	K15456 protein KTI12 | (RefSeq) KTI12 protein homolog	http://www.genome.jp/dbget-bin/www_bget?api:100302631	DcitrP054700.1	Protein KTI12 (AHRD V3.11 *** tr|A0A0A9VUI6|A0A0A9VUI6_LYGHE). Similar to MCOT14679.0.CC XP_008473337.1. AED 0.00
DcitrP072075.1	DcitrP072075.1	ScVcwli_2862:5-6905	0.633005	2.84573	-1.6779	0.000253102	0.0193951	>DcitrP072075.1.1 Mucin-17-like isoform x1 protein (AHRD V3.11 *-* tr|A0A0J7L230|A0A0J7L230_LASNI). Similar to XP_017300265.1. AED 0.05	--	--	--	--	--	--	--	--	DcitrP072075.1	Mucin-17-like isoform x1 protein (AHRD V3.11 *-* tr|A0A0J7L230|A0A0J7L230_LASNI). Similar to XP_017300265.1. AED 0.05
DcitrP030345.1	DcitrP030345.1	ScVcwli_1131:82592-84461	7.22026	32.8645	-1.69016	5.75796e-06	0.00103593	>DcitrP030345.1.1 Ssu72 RNA polymerase II CTD phosphatase (AHRD V3.11 *** tr|Q1HPU4|Q1HPU4_BOMMO). Similar to MCOT22844.0.CC XP_008487998.1. AED 0.00| InterPro:IPR006811,Pfam:PF04722| GO:0004721,GO:0005634,GO:0006397	GO:0006397	mRNA processing	GO:0005634	nucleus	GO:0004721	phosphoprotein phosphatase activity	K15544 RNA polymerase II subunit A C-terminal domain phosphatase SSU72 [EC:3.1.3.16] | (RefSeq) RNA polymerase II subunit A C-terminal domain phosphatase SSU72-like	http://www.genome.jp/dbget-bin/www_bget?api:100164021	DcitrP030345.1	Ssu72 RNA polymerase II CTD phosphatase (AHRD V3.11 *** tr|Q1HPU4|Q1HPU4_BOMMO). Similar to MCOT22844.0.CC XP_008487998.1. AED 0.00
DcitrP045835.1	DcitrP045835.1	ScVcwli_1889:324978-326159	3.56393	16.5351	-1.72053	0.000252105	0.0193951	>DcitrP045835.1.1 Cyclin-dependent kinase 2-associated protein 1 (AHRD V3.11 *** tr|A0A194QAV5|A0A194QAV5_PAPXU). Similar to MCOT20739.0.CC XP_008487041.1. AED 0.00	--	--	--	--	--	--	no KO assigned | (RefSeq) uncharacterized LOC100166162	http://www.genome.jp/dbget-bin/www_bget?api:100166162	DcitrP045835.1	Cyclin-dependent kinase 2-associated protein 1 (AHRD V3.11 *** tr|A0A194QAV5|A0A194QAV5_PAPXU). Similar to MCOT20739.0.CC XP_008487041.1. AED 0.00
DcitrP037325.1	DcitrP037325.1	ScVcwli_1438:880892-882835	2.36517	10.9697	-1.72101	0.000238797	0.0185741	>DcitrP037325.1.1 Unknown protein. AED 0.15	--	--	--	--	--	--	--	--	DcitrP037325.1	Unknown protein. AED 0.15
XLOC_034053	XLOC_034053	ScVcwli_935:130222-134948	0.651365	3.08374	-1.72179	0.000831599	0.0435589		--	--	--	--	--	--	--	--	--	--
DcitrP001870.1	DcitrP001870.1	ScVcwli_85:548641-616902	0.485361	2.30257	-1.72293	3.13177e-05	0.00384283	>DcitrP001870.1.1 Tyrosine protein kinase receptor torso-RA. (AHRD V3.11 *** 3-phosphoinositide-dependent protein kinase 1 tr|A0A146LPQ3|A0A146LPQ3_LYGHE). Similar to MCOT16275.0.CT. AED 0.12| InterPro:IPR000719,Pfam:PF00069| GO:0004672,GO:0005524,GO:0006468	GO:0006468	protein phosphorylation	GO:0016020	membrane	GO:0016773//GO:0005524//GO:0004672	phosphotransferase activity, alcohol group as acceptor//ATP binding//protein kinase activity	K06276 3-phosphoinositide dependent protein kinase-1 [EC:2.7.11.1] | (RefSeq) 3-phosphoinositide-dependent protein kinase 1	http://www.genome.jp/dbget-bin/www_bget?api:100159966	DcitrP001870.1	Tyrosine protein kinase receptor torso-RA. (AHRD V3.11 *** 3-phosphoinositide-dependent protein kinase 1 tr|A0A146LPQ3|A0A146LPQ3_LYGHE). Similar to MCOT16275.0.CT. AED 0.12||Tyrosine protein kinase receptor torso-RB. (AHRD V3.11 *** 3-phosphoinositide-dependent protein kinase 1 tr|A0A146LKE7|A0A146LKE7_LYGHE). AED 0.35||Tyrosine protein kinase receptor torso-RC. (AHRD V3.11 *** 3-phosphoinositid…
DcitrP048930.1	DcitrP048930.1	ScVcwli_2016:22351-30033	1.61983	7.55141	-1.74731	2.921e-06	0.000623047	>DcitrP048930.1.1 N-acetyltransferase (AHRD V3.11 *** tr|S4P9N5|S4P9N5_9NEOP). Similar to MCOT14599.2.CC XP_017300578.1. AED 0.00| InterPro:IPR000182,Pfam:PF00583| GO:0008080	GO:0007186//GO:0009058	G-protein coupled receptor signaling pathway//biosynthetic process	GO:0016021	integral component of membrane	GO:0008080//GO:0016747//GO:0046872//GO:0004930//GO:0003824	N-acetyltransferase activity//transferase activity, transferring acyl groups other than amino-acyl groups//metal ion binding//G-protein coupled receptor activity//catalytic activity	K20793 N-alpha-acetyltransferase 50 [EC:2.3.1.258] | (RefSeq) N-acetyltransferase-like	http://www.genome.jp/dbget-bin/www_bget?api:100163396	DcitrP048930.1	N-acetyltransferase (AHRD V3.11 *** tr|S4P9N5|S4P9N5_9NEOP). Similar to MCOT14599.2.CC XP_017300578.1. AED 0.00
DcitrP088840.1	DcitrP088840.1	ScVcwli_3451:52768-53271	9.88059	46.6742	-1.7521	8.54845e-05	0.00846255	>DcitrP088840.1.1 N-acetyltransferase (AHRD V3.11 *** tr|S4P9N5|S4P9N5_9NEOP). Similar to MCOT14599.2.CC XP_017300578.1. AED 0.44| InterPro:IPR000182,Pfam:PF00583| GO:0008080	--	--	--	--	GO:0008080//GO:0016747	N-acetyltransferase activity//transferase activity, transferring acyl groups other than amino-acyl groups	K20793 N-alpha-acetyltransferase 50 [EC:2.3.1.258] | (RefSeq) N-acetyltransferase-like	http://www.genome.jp/dbget-bin/www_bget?api:100163396	DcitrP088840.1	N-acetyltransferase (AHRD V3.11 *** tr|S4P9N5|S4P9N5_9NEOP). Similar to MCOT14599.2.CC XP_017300578.1. AED 0.44
DcitrP089530.1	DcitrP089530.1	ScVcwli_3461:223249-224749	2.72299	13.178	-1.7687	0.000220849	0.0174403	>DcitrP089530.1.1 zinc finger CCCH domain-containing protein 11A-like (AHRD V3.11 *-* tr|A0A1W4WPD2|A0A1W4WPD2_AGRPL). Similar to MCOT00940.0.CC XP_008469473.1. AED 0.00,Pfam:PF15663	GO:0007018	microtubule-based movement	GO:0005868	cytoplasmic dynein complex	--	--	no KO assigned | (RefSeq) zinc finger CCCH domain-containing protein 11A-like	http://www.genome.jp/dbget-bin/www_bget?api:100166667	DcitrP089530.1	zinc finger CCCH domain-containing protein 11A-like (AHRD V3.11 *-* tr|A0A1W4WPD2|A0A1W4WPD2_AGRPL). Similar to MCOT00940.0.CC XP_008469473.1. AED 0.00
DcitrP029260.1	DcitrP029260.1	ScVcwli_1117:575728-587163	0.624559	2.96049	-1.80762	7.16242e-05	0.00740952	>DcitrP029260.1.1 Unknown protein. AED 0.00	GO:0006364//GO:0015986//GO:0009245	rRNA processing//ATP synthesis coupled proton transport//lipid A biosynthetic process	GO:0005634//GO:0000276	nucleus//mitochondrial proton-transporting ATP synthase complex, coupling factor F(o)	GO:0016747//GO:0004867//GO:0015078//GO:0008168	transferase activity, transferring acyl groups other than amino-acyl groups//serine-type endopeptidase inhibitor activity//hydrogen ion transmembrane transporter activity//methyltransferase activity	--	--	DcitrP029260.1	Unknown protein. AED 0.00
DcitrP051380.1	DcitrP051380.1	ScVcwli_2134:58018-68335	0.526176	2.63355	-1.81897	2.62118e-05	0.00334767	>DcitrP051380.1.1 AAEL007322-PA (AHRD V3.11 *** tr|Q172P3|Q172P3_AEDAE). AED 0.30| InterPro:IPR000326,Pfam:PF01569	GO:0015979	photosynthesis	GO:0016021//GO:0009523	integral component of membrane//photosystem II	GO:0003677//GO:0046872	DNA binding//metal ion binding	K01080 phosphatidate phosphatase [EC:3.1.3.4] | (RefSeq) Ppap2a, wun; phosphatidic acid phosphatase type 2A	http://www.genome.jp/dbget-bin/www_bget?api:100164616	DcitrP051380.1	AAEL007322-PA (AHRD V3.11 *** tr|Q172P3|Q172P3_AEDAE). AED 0.30
DcitrP094950.1	DcitrP094950.1	ScVcwli_3532:140423-141147	7.28398	36.1972	-1.82434	2.82633e-05	0.00356566	>DcitrP094950.1.1 Anaphase-promoting complex subunit CDC26 (AHRD V3.11 *** tr|A0A067R846|A0A067R846_ZOONE). AED 0.36	GO:0006355//GO:0030071//GO:0031145	regulation of transcription, DNA-templated//regulation of mitotic metaphase/anaphase transition//anaphase-promoting complex-dependent proteasomal ubiquitin-dependent protein catabolic process	GO:0005680	anaphase-promoting complex	--	--	--	--	DcitrP094950.1	Anaphase-promoting complex subunit CDC26 (AHRD V3.11 *** tr|A0A067R846|A0A067R846_ZOONE). AED 0.36
DcitrP043520.1	DcitrP043520.1	ScVcwli_1745:97205-111914	6.23672	31.4992	-1.83415	8.08144e-09	3.63489e-06	>DcitrP043520.1.1 Mediator of RNA polymerase II transcription subunit 9 (AHRD V3.11 *** tr|A0A1B6EEB5|A0A1B6EEB5_9HEMI). Similar to MCOT07042.0.OO. AED 0.23| InterPro:IPR011425,Pfam:PF07544| GO:0001104,GO:0006357,GO:0016592	GO:0007165//GO:0030168//GO:0006357//GO:0051258	signal transduction//platelet activation//regulation of transcription from RNA polymerase II promoter//protein polymerization	GO:0005577//GO:0016592	fibrinogen complex//mediator complex	GO:0001104//GO:0030674//GO:0005102	RNA polymerase II transcription cofactor activity//protein binding, bridging//receptor binding	K15149 mediator of RNA polymerase II transcription subunit 9 | (RefSeq) mediator of RNA polymerase II transcription subunit 9	http://www.genome.jp/dbget-bin/www_bget?api:100574181	DcitrP043520.1	Mediator of RNA polymerase II transcription subunit 9 (AHRD V3.11 *** tr|A0A1B6EEB5|A0A1B6EEB5_9HEMI). Similar to MCOT07042.0.OO. AED 0.23
DcitrP098380.1	DcitrP098380.1	ScVcwli_3582:374316-380039	1.06105	5.445	-1.84597	3.15748e-05	0.00384283	>DcitrP098380.1.1 BTB/POZ domain-containing protein 9 (AHRD V3.11 *** tr|A0A067RQU4|A0A067RQU4_ZOONE). Similar to MCOT04872.0.CC XP_017299458.1. AED 0.04	--	--	--	--	GO:0005515	protein binding	K10481 BTB/POZ domain-containing protein 9 | (RefSeq) BTB/POZ domain-containing protein 9	http://www.genome.jp/dbget-bin/www_bget?api:100166769	DcitrP098380.1	BTB/POZ domain-containing protein 9 (AHRD V3.11 *** tr|A0A067RQU4|A0A067RQU4_ZOONE). Similar to MCOT04872.0.CC XP_017299458.1. AED 0.04||BTB/POZ domain-containing protein 9 (AHRD V3.11 *** tr|A0A067RQU4|A0A067RQU4_ZOONE). Similar to MCOT04872.0.CC XP_017299458.1. AED 0.00
DcitrP010645.1	DcitrP010645.1	ScVcwli_450:15992-20782	1.00532	5.16644	-1.85545	0.000208906	0.016753	>DcitrP010645.1.1 Aftiphilin (AHRD V3.11 *-* tr|A0A067QMS4|A0A067QMS4_ZOONE). Similar to MCOT21780.1.CO XP_017302080.1. AED 0.66	--	--	--	--	--	--	no KO assigned | (RefSeq) uncharacterized LOC100575814	http://www.genome.jp/dbget-bin/www_bget?api:100575814	DcitrP010645.1	Aftiphilin (AHRD V3.11 *-* tr|A0A067QMS4|A0A067QMS4_ZOONE). Similar to MCOT21780.1.CO XP_017302080.1. AED 0.66
DcitrP021750.1	DcitrP021750.1	ScVcwli_910:114091-114983	2.63185	13.6682	-1.85598	0.000494947	0.0305685	>DcitrP021750.1.1 Protein unc-119-like protein (AHRD V3.11 *** tr|A0A034V0C4|A0A034V0C4_BACDO). Similar to MCOT13256.0.CC XP_008474932.1. AED 0.14| InterPro:IPR008015,Pfam:PF05351	--	--	--	--	--	--	no KO assigned | (RefSeq) protein unc-119 homolog B	http://www.genome.jp/dbget-bin/www_bget?api:100165426	DcitrP021750.1	Protein unc-119-like protein (AHRD V3.11 *** tr|A0A034V0C4|A0A034V0C4_BACDO). Similar to MCOT13256.0.CC XP_008474932.1. AED 0.14
DcitrP024125.1	DcitrP024125.1	ScVcwli_969:156465-159946	9.42797	48.1588	-1.85759	6.8275e-08	2.43922e-05	>DcitrP024125.1.1 Histone H3 (AHRD V3.11 *** tr|A0A151IG43|A0A151IG43_9HYME). Similar to MCOT05881.0.CC XP_017303499.1. AED 0.02| InterPro:IPR007125,Pfam:PF00125| GO:0003677	GO:0051726//GO:0006629//GO:0006974	regulation of cell cycle//lipid metabolic process//cellular response to DNA damage stimulus	--	--	GO:0003677	DNA binding	K11253 histone H3 | (RefSeq) histone H3.3	http://www.genome.jp/dbget-bin/www_bget?api:100570478	DcitrP024125.1	Histone H3 (AHRD V3.11 *** tr|A0A151IG43|A0A151IG43_9HYME). Similar to MCOT05881.0.CC XP_017303499.1. AED 0.02
DcitrP040285.1	DcitrP040285.1	ScVcwli_1625:225495-229009	1.38228	7.04174	-1.87159	3.56189e-05	0.00421117	>DcitrP040285.1.1 Vacuolar protein sorting-associated protein 33B (AHRD V3.11 *** tr|A0A067R5H4|A0A067R5H4_ZOONE). Similar to MCOT03415.2.CC XP_008480305.1. AED 0.00| InterPro:IPR001619,Pfam:PF00995| GO:0006904,GO:0016192	GO:0016192//GO:0006904	vesicle-mediated transport//vesicle docking involved in exocytosis	--	--	--	--	no KO assigned | (RefSeq) vacuolar protein sorting-associated protein 33B	http://www.genome.jp/dbget-bin/www_bget?api:100164414	DcitrP040285.1	Vacuolar protein sorting-associated protein 33B (AHRD V3.11 *** tr|A0A067R5H4|A0A067R5H4_ZOONE). Similar to MCOT03415.2.CC XP_008480305.1. AED 0.00
DcitrP034560.1	DcitrP034560.1	ScVcwli_1319:844815-852665	1.35309	6.96342	-1.8847	1.15877e-06	0.000286095	>DcitrP034560.1.1 Partitioning defective 6 like protein gamma (AHRD V3.11 *** tr|A0A0L7RFT8|A0A0L7RFT8_9HYME). Similar to MCOT10716.0.MO. AED 0.02	--	--	--	--	GO:0005515	protein binding	K06093 partitioning defective protein 6 | (RefSeq) partitioning defective protein 6	http://www.genome.jp/dbget-bin/www_bget?api:100169272	DcitrP034560.1	Partitioning defective 6 like protein gamma (AHRD V3.11 *** tr|A0A0L7RFT8|A0A0L7RFT8_9HYME). Similar to MCOT10716.0.MO. AED 0.04||Partitioning defective 6 like protein gamma (AHRD V3.11 *** tr|A0A0L7RFT8|A0A0L7RFT8_9HYME). Similar to MCOT10716.0.MO. AED 0.02
DcitrP093380.1	DcitrP093380.1	ScVcwli_3508:8984-84362	0.5366	2.7504	-1.8853	1.74202e-06	0.000410628	>DcitrP093380.1.1 Glutathione S-transferase (AHRD V3.11 *** tr|A0A067RMR4|A0A067RMR4_ZOONE). Similar to MCOT21153.0.CO XP_017303746.1. AED 0.38	--	--	--	--	GO:0005515	protein binding	K04097 prostaglandin-H2 D-isomerase / glutathione transferase [EC:5.3.99.2 2.5.1.18] | (RefSeq) glutathione S-transferase-like	http://www.genome.jp/dbget-bin/www_bget?api:100168850	DcitrP093380.1	Glutathione S-transferase (AHRD V3.11 *** tr|A0A067RMR4|A0A067RMR4_ZOONE). Similar to MCOT21153.0.CO XP_017303746.1. AED 0.38
XLOC_012336	XLOC_012336	ScVcwli_2397:123031-124388	3.33997	17.7481	-1.89312	0.000234953	0.0184836		--	--	--	--	--	--	--	--	--	--
DcitrP019540.1	DcitrP019540.1	ScVcwli_832:336157-378112	0.284551	1.55066	-1.89765	6.1917e-05	0.00670713	>DcitrP019540.1.1 Cleft lip and palate transmembrane protein 1-like protein (AHRD V3.11 *-* tr|A0A0L7QV50|A0A0L7QV50_9HYME). Similar to MCOT00449.0.CT. AED 0.11	GO:0001522//GO:0016310//GO:0009451//GO:0055114	pseudouridine synthesis//phosphorylation//RNA modification//oxidation-reduction process	--	--	GO:0009982//GO:0016301//GO:0016972//GO:0016772//GO:0003723//GO:0005524	pseudouridine synthase activity//kinase activity//thiol oxidase activity//transferase activity, transferring phosphorus-containing groups//RNA binding//ATP binding	K01007 pyruvate, water dikinase [EC:2.7.9.2] | (RefSeq) uncharacterized LOC100570052	http://www.genome.jp/dbget-bin/www_bget?api:100570052	DcitrP019540.1	Cleft lip and palate transmembrane protein 1-like protein (AHRD V3.11 *-* tr|A0A0L7QV50|A0A0L7QV50_9HYME). Similar to MCOT00449.0.CT. AED 0.11
DcitrP088680.1	DcitrP088680.1	ScVcwli_3449:24525-28277	3.89667	20.472	-1.90028	6.58022e-07	0.000176811	DcitrP088680.1.1 Rab 3-RA. (AHRD V3.11 *** Ras-related protein rab-7a tr|A0A0J7L9F0|A0A0J7L9F0_LASNI). Similar to MCOT07680.0.MT. AED 0.06| InterPro:IPR001806,Pfam:PF00071| GO:0003924,GO:0005525	GO:0007264//GO:0006576//GO:0007155//GO:0007186	small GTPase mediated signal transduction//cellular biogenic amine metabolic process//cell adhesion//G-protein coupled receptor signaling pathway	--	--	GO:0003924//GO:0019001//GO:0031683//GO:0004871//GO:0005524//GO:0030246//GO:0005525	GTPase activity//guanyl nucleotide binding//G-protein beta/gamma-subunit complex binding//signal transducer activity//ATP binding//carbohydrate binding//GTP binding	K07897 Ras-related protein Rab-7A | (RefSeq) ras-related protein Rab-7-like	http://www.genome.jp/dbget-bin/www_bget?api:100161383	DcitrP088680.1	Rab 3-RC. (AHRD V3.11 *** Ras-related protein rab-7a tr|A0A0J7L9F0|A0A0J7L9F0_LASNI). Similar to MCOT07680.0.MT. AED 0.04||Rab 3-RB. (AHRD V3.11 *** Ras-related protein rab-7a tr|A0A0J7L9F0|A0A0J7L9F0_LASNI). Similar to MCOT07680.0.MT. AED 0.05||Rab 3-RA. (AHRD V3.11 *** Ras-related protein rab-7a tr|A0A0J7L9F0|A0A0J7L9F0_LASNI). Similar to MCOT07680.0.MT. AED 0.06
DcitrP097760.1	DcitrP097760.1	ScVcwli_3576:142922-144783	3.64977	18.8746	-1.90133	5.34186e-06	0.000986812	>DcitrP097760.1.1 Unknown protein. Similar to MCOT13563.0.CO XP_017298716.1. AED 0.00	--	--	--	--	--	--	--	--	DcitrP097760.1	Unknown protein. Similar to MCOT13563.0.CO XP_017298716.1. AED 0.00
DcitrP024070.1	DcitrP024070.1	ScVcwli_969:321406-322202	5.38817	28.7272	-1.90878	6.51163e-05	0.00694462	>DcitrP024070.1.1 Histone H3 (AHRD V3.11 *** tr|A0A151IG43|A0A151IG43_9HYME). Similar to MCOT07216.0.MM XP_017303688.1. AED 0.45| InterPro:IPR007125,Pfam:PF00125| GO:0003677	--	--	--	--	GO:0003677	DNA binding	K11253 histone H3 | (RefSeq) histone H3.3	http://www.genome.jp/dbget-bin/www_bget?api:100570478	DcitrP024070.1	Histone H3 (AHRD V3.11 *** tr|A0A151IG43|A0A151IG43_9HYME). Similar to MCOT07216.0.MM XP_017303688.1. AED 0.45
DcitrP051350.1	DcitrP051350.1	ScVcwli_2134:170249-185797	0.17525	0.93791	-1.91619	0.000455824	0.028841	>DcitrP051350.1.1 AAEL007322-PA (AHRD V3.11 *** tr|Q172P3|Q172P3_AEDAE). AED 0.19| InterPro:IPR000326,Pfam:PF01569	GO:0015979	photosynthesis	GO:0009523//GO:0016021	photosystem II//integral component of membrane	GO:0046872	metal ion binding	K01080 phosphatidate phosphatase [EC:3.1.3.4] | (RefSeq) Ppap2a, wun; phosphatidic acid phosphatase type 2A	http://www.genome.jp/dbget-bin/www_bget?api:100164616	DcitrP051350.1	AAEL007322-PA (AHRD V3.11 *** tr|Q172P3|Q172P3_AEDAE). AED 0.19||AAEL007322-PA (AHRD V3.11 *** tr|Q172P3|Q172P3_AEDAE). AED 0.12
DcitrP006125.1	DcitrP006125.1	ScVcwli_277:43712-51586	0.534562	2.73788	-1.92614	0.00017873	0.0148511	>DcitrP006125.1.1 Unknown protein. AED 0.29	--	--	GO:0016021	integral component of membrane	GO:0004867	serine-type endopeptidase inhibitor activity	--	--	DcitrP006125.1	Unknown protein. AED 0.29
DcitrP066640.1	DcitrP066640.1	ScVcwli_2663:220606-224587	2.77577	15.453	-1.92726	4.05529e-05	0.00468737	>DcitrP066640.1.1 Protein tyrosine phosphatase type IVA 1 (AHRD V3.11 *** tr|A0A154PCD0|A0A154PCD0_9HYME). Similar to MCOT19993.0.CC XP_008479058.1. AED 0.33| InterPro:IPR000340,Pfam:PF00782| GO:0008138,GO:0016311	GO:0006470	protein dephosphorylation	--	--	GO:0004725//GO:0008138	protein tyrosine phosphatase activity//protein tyrosine/serine/threonine phosphatase activity	K18041 protein tyrosine phosphatase type IVA [EC:3.1.3.48] | (RefSeq) Ptp4a1, PRL-1; protein tyrosine phosphatase type IVA, member 1	http://www.genome.jp/dbget-bin/www_bget?api:100163237	DcitrP066640.1	Protein tyrosine phosphatase type IVA 1 (AHRD V3.11 *** tr|A0A154PCD0|A0A154PCD0_9HYME). Similar to MCOT19993.0.CC XP_008479058.1. AED 0.33
DcitrP032225.1	DcitrP032225.1	ScVcwli_1219:64985-73761	1.73517	9.351	-1.93766	4.0978e-08	1.57006e-05	>DcitrP032225.1.1 CG8818-PA (AHRD V3.11 *-* FBpp0087052). Similar to MCOT23210.0.CO. AED 0.12	--	--	GO:0019033	viral tegument	--	--	no KO assigned | (RefSeq) uncharacterized LOC100159789	http://www.genome.jp/dbget-bin/www_bget?api:100159789	DcitrP032225.1	CG8818-PA (AHRD V3.11 *-* FBpp0087052). Similar to MCOT23210.0.CO. AED 0.14||CG8818-PA (AHRD V3.11 *-* FBpp0087052). Similar to MCOT23210.0.CO. AED 0.12||CG8818-PA (AHRD V3.11 *-* FBpp0087052). Similar to MCOT23210.0.CO. AED 0.08
DcitrP003345.1	DcitrP003345.1	ScVcwli_126:334957-445297	0.240253	1.24421	-1.94491	0.000394468	0.0263569	>DcitrP003345.1.1 Mediator of RNA polymerase II transcription subunit 20 (AHRD V3.11 *** tr|A0A158NBQ9|A0A158NBQ9_ATTCE). AED 0.34| InterPro:IPR013921,Pfam:PF08612| GO:0001104,GO:0006357,GO:0016592	GO:0006357	regulation of transcription from RNA polymerase II promoter	GO:0016592	mediator complex	GO:0001104	RNA polymerase II transcription cofactor activity	K13528 mediator of RNA polymerase II transcription subunit 20 | (RefSeq) mediator of RNA polymerase II transcription subunit 20	http://www.genome.jp/dbget-bin/www_bget?api:100169069	DcitrP003345.1	Mediator of RNA polymerase II transcription subunit 20 (AHRD V3.11 *** tr|A0A158NBQ9|A0A158NBQ9_ATTCE). AED 0.34
DcitrP047910.1	DcitrP047910.1	ScVcwli_1951:1190000-1192899	1.1611	6.32524	-1.96301	7.03314e-05	0.00731234	>DcitrP047910.1.1 RWD domain-containing protein 2A (AHRD V3.11 *** tr|A0A067R8H9|A0A067R8H9_ZOONE). Similar to MCOT21367.1.CT XP_008470567.1. AED 0.00	GO:0006464//GO:0015031	cellular protein modification process//protein transport	--	--	GO:0005515	protein binding	no KO assigned | (RefSeq) THAP domain-containing protein 1-like	http://www.genome.jp/dbget-bin/www_bget?api:103308227	DcitrP047910.1	RWD domain-containing protein 2A (AHRD V3.11 *** tr|A0A067R8H9|A0A067R8H9_ZOONE). Similar to MCOT21367.1.CT XP_008470567.1. AED 0.00
DcitrP015485.1	DcitrP015485.1	ScVcwli_620:1622241-1669075	9.31393	54.1004	-1.97087	1.83514e-10	1.80805e-07	>DcitrP015485.1.1 Protein BTG3 (AHRD V3.11 *-* tr|A0A154NWU9|A0A154NWU9_9HYME). Similar to MCOT21689.0.CO. AED 0.34	--	--	GO:0005739	mitochondrion	GO:0003968	RNA-directed RNA polymerase activity	K14443 protein Tob/BTG | (RefSeq) protein BTG2-like	http://www.genome.jp/dbget-bin/www_bget?api:100573844	DcitrP015485.1	Protein BTG3 (AHRD V3.11 *-* tr|A0A154NWU9|A0A154NWU9_9HYME). Similar to MCOT21689.0.CO. AED 0.02||Protein BTG3 (AHRD V3.11 *-* tr|A0A154NWU9|A0A154NWU9_9HYME). Similar to MCOT21689.0.CO. AED 0.34
DcitrP068560.1	DcitrP068560.1	ScVcwli_2739:1123435-1126619	3.38336	18.8992	-1.98114	3.78229e-08	1.48649e-05	>DcitrP068560.1.1 Cytosolic Fe-S cluster assembly factor NUBP2 homolog-like Protein (AHRD V3.11 *** tr|D6WCQ3|D6WCQ3_TRICA). Similar to MCOT00866.0.CT. AED 0.47| InterPro:IPR033756,Pfam:PF10609	--	--	--	--	--	--	K03593 ATP-binding protein involved in chromosome partitioning | (RefSeq) iron-sulfur protein NUBPL-like	http://www.genome.jp/dbget-bin/www_bget?api:100169181	DcitrP068560.1	Cytosolic Fe-S cluster assembly factor NUBP2 homolog-like Protein (AHRD V3.11 *** tr|D6WCQ3|D6WCQ3_TRICA). Similar to MCOT00866.0.CT. AED 0.47
DcitrP034880.1	DcitrP034880.1	ScVcwli_1319:2809000-2813336	1.52055	8.57514	-1.99174	7.48108e-06	0.00129999	>DcitrP034880.1.1 N-acetyltransferase MAK3-like protein (AHRD V3.11 *-* tr|A0A067RC99|A0A067RC99_ZOONE). Similar to MCOT16511.0.CO XP_008469412.1. AED 0.04	--	--	--	--	GO:0008080//GO:0016747	N-acetyltransferase activity//transferase activity, transferring acyl groups other than amino-acyl groups	K00670 N-alpha-acetyltransferase 30 [EC:2.3.1.256] | (RefSeq) N-alpha-acetyltransferase 30-like	http://www.genome.jp/dbget-bin/www_bget?api:100159183	DcitrP034880.1	N-acetyltransferase MAK3-like protein (AHRD V3.11 *-* tr|A0A067RC99|A0A067RC99_ZOONE). Similar to MCOT16511.0.CO XP_008469412.1. AED 0.01||N-acetyltransferase MAK3-like protein (AHRD V3.11 *-* tr|A0A067RC99|A0A067RC99_ZOONE). Similar to MCOT16511.0.CO XP_008469412.1. AED 0.04
DcitrP003025.1	DcitrP003025.1	ScVcwli_110:68271-68702	5.43268	30.4952	-1.99502	0.000193635	0.0157728	>DcitrP003025.1.1 6-pyruvoyl tetrahydrobiopterin synthase (AHRD V3.11 *** tr|A0A1B6K5I9|A0A1B6K5I9_9HEMI). Similar to MCOT09725.0.MM XP_017298344.1. AED 0.48| InterPro:IPR007115,Pfam:PF01242	--	--	--	--	--	--	K01737 6-pyruvoyltetrahydropterin/6-carboxytetrahydropterin synthase [EC:4.2.3.12 4.1.2.50] | (RefSeq) 6-pyruvoyl tetrahydrobiopterin synthase	http://www.genome.jp/dbget-bin/www_bget?api:100166197	DcitrP003025.1	6-pyruvoyl tetrahydrobiopterin synthase (AHRD V3.11 *** tr|A0A1B6K5I9|A0A1B6K5I9_9HEMI). Similar to MCOT09725.0.MM XP_017298344.1. AED 0.48
DcitrP041820.1	DcitrP041820.1	ScVcwli_1663:611843-617634	6.39917	36.0635	-1.99505	1.19198e-07	4.18001e-05	>DcitrP041820.1.1 MOB kinase activator-like 2 (AHRD V3.11 *** tr|A0A0A9ZCX2|A0A0A9ZCX2_LYGHE). Similar to MCOT19208.0.CO. AED 0.00| InterPro:IPR005301,Pfam:PF03637	--	--	--	--	GO:0003677	DNA binding	no KO assigned | (RefSeq) MOB kinase activator-like 2	http://www.genome.jp/dbget-bin/www_bget?api:100161905	DcitrP041820.1	MOB kinase activator-like 2 (AHRD V3.11 *** tr|A0A0A9ZCX2|A0A0A9ZCX2_LYGHE). Similar to MCOT19208.0.CO. AED 0.00
XLOC_012808	XLOC_012808	ScVcwli_2456:555722-565866	0.437658	2.6919	-2.00529	0.000581644	0.0337093		--	--	--	--	--	--	--	--	--	--
DcitrP057665.1	DcitrP057665.1	ScVcwli_2335:509156-517015	9.17797	54.396	-2.03672	9.60032e-06	0.00156402	>DcitrP057665.1.2 Succinate dehydrogenase assembly factor 2, mitochondrial (AHRD V3.11 *** tr|A0A1B6H4C9|A0A1B6H4C9_9HEMI). Similar to MCOT20771.0.CC. AED 0.04	--	--	--	--	--	--	K18168 succinate dehydrogenase assembly factor 2 | (RefSeq) succinate dehydrogenase assembly factor 2-A, mitochondrial-like	http://www.genome.jp/dbget-bin/www_bget?api:100163113	DcitrP057665.1	Unknown protein. AED 0.27||Succinate dehydrogenase assembly factor 2, mitochondrial (AHRD V3.11 *** tr|A0A1B6H4C9|A0A1B6H4C9_9HEMI). Similar to MCOT20771.0.CC. AED 0.30||Succinate dehydrogenase assembly factor 2, mitochondrial (AHRD V3.11 *** tr|A0A1B6H4C9|A0A1B6H4C9_9HEMI). Similar to MCOT20771.0.CC. AED 0.04
DcitrP053570.1	DcitrP053570.1	ScVcwli_2175:2105479-2108146	1.17782	6.9435	-2.04866	2.24425e-05	0.00303487	>DcitrP053570.1.1 tRNA-splicing endonuclease subunit Sen2 (AHRD V3.11 *** tr|A0A023F762|A0A023F762_TRIIF). Similar to MCOT19765.2.CC. AED 0.01	GO:0006388//GO:0035556	tRNA splicing, via endonucleolytic cleavage and ligation//intracellular signal transduction	GO:0016020	membrane	GO:0000213	tRNA-intron endonuclease activity	K15322 tRNA-splicing endonuclease subunit Sen2 [EC:3.1.27.9] | (RefSeq) uncharacterized LOC100568704	http://www.genome.jp/dbget-bin/www_bget?api:100568704	DcitrP053570.1	tRNA-splicing endonuclease subunit Sen2 (AHRD V3.11 *** tr|A0A023F762|A0A023F762_TRIIF). Similar to MCOT19765.2.CC. AED 0.01
DcitrP045800.1	DcitrP045800.1	ScVcwli_1886:20484-23388	3.3792	18.8808	-2.07071	0.000585391	0.0337374	>DcitrP045800.1.1 CYP301A1 partial-RA. (AHRD V3.11 *** Cytochrome P450 tr|A0A288D097|A0A288D097_LOCMI). Similar to XP_017303291.1. AED 0.02| InterPro:IPR001128,Pfam:PF00067| GO:0005506,GO:0016705,GO:0020037,GO:0055114	GO:0055114	oxidation-reduction process	--	--	GO:0005506//GO:0020037//GO:0016705	iron ion binding//heme binding//oxidoreductase activity, acting on paired donors, with incorporation or reduction of molecular oxygen	K14999 cytochrome P450 family 6 [EC:1.14.-.-] | (RefSeq) probable cytochrome P450 6a13	http://www.genome.jp/dbget-bin/www_bget?api:100159387	DcitrP045800.1	CYP301A1 partial-RA. (AHRD V3.11 *** Cytochrome P450 tr|A0A288D097|A0A288D097_LOCMI). Similar to XP_017303291.1. AED 0.02
DcitrP054065.1	DcitrP054065.1	ScVcwli_2191:7844-10786	0.810427	4.86519	-2.08136	6.39439e-05	0.00689063	>DcitrP054065.1.1 Acyl-CoA dehydrogenase family member 9, mitochondrial-like Protein (AHRD V3.11 *** tr|D6WCN5|D6WCN5_TRICA). Similar to MCOT21713.0.CO. AED 0.04	GO:0006310//GO:0006281//GO:0008152//GO:0055114	DNA recombination//DNA repair//metabolic process//oxidation-reduction process	--	--	GO:0016788//GO:0050660//GO:0000287//GO:0003995//GO:0000400//GO:0016627	hydrolase activity, acting on ester bonds//flavin adenine dinucleotide binding//magnesium ion binding//acyl-CoA dehydrogenase activity//four-way junction DNA binding//oxidoreductase activity, acting on the CH-CH group of donors	K15980 acyl-CoA dehydrogenase family member 9 [EC:1.3.99.-] | (RefSeq) acyl-CoA dehydrogenase family member 9, mitochondrial	http://www.genome.jp/dbget-bin/www_bget?api:100159610	DcitrP054065.1	Acyl-CoA dehydrogenase family member 9, mitochondrial-like Protein (AHRD V3.11 *** tr|D6WCN5|D6WCN5_TRICA). Similar to MCOT21713.0.CO. AED 0.04
DcitrP063760.1	DcitrP063760.1	ScVcwli_2588:782565-785710	1.73746	10.2354	-2.08741	3.47483e-06	0.000713059	>DcitrP063760.1.1 Unknown protein. Similar to MCOT23366.0.CT. AED 0.45	--	--	--	--	--	--	--	--	DcitrP063760.1	Unknown protein. Similar to MCOT23366.0.CT. AED 0.45
DcitrP041830.1	DcitrP041830.1	ScVcwli_1663:752621-756676	4.05382	24.3922	-2.09657	2.71018e-09	1.5576e-06	>DcitrP041830.1.1 MOB kinase activator-like 2 (AHRD V3.11 *** tr|A0A0A9ZCX2|A0A0A9ZCX2_LYGHE). AED 0.00| InterPro:IPR005301,Pfam:PF03637	--	--	--	--	GO:0003677	DNA binding	no KO assigned | (RefSeq) MOB kinase activator-like 2	http://www.genome.jp/dbget-bin/www_bget?api:100161905	DcitrP041830.1	MOB kinase activator-like 2 (AHRD V3.11 *** tr|A0A0A9ZCX2|A0A0A9ZCX2_LYGHE). AED 0.00
DcitrP042625.1	DcitrP042625.1	ScVcwli_1703:110697-114827	3.53022	21.4018	-2.10226	3.64908e-09	1.93936e-06	>DcitrP042625.1.1 Protein with signal anchor (AHRD V3.11 *** tr|A0A1Q3FXT2|A0A1Q3FXT2_CULTA). Similar to MCOT10441.0.MT. AED 0.06	--	--	GO:0016021	integral component of membrane	--	--	no KO assigned | (RefSeq) uncharacterized LOC100167550	http://www.genome.jp/dbget-bin/www_bget?api:100167550	DcitrP042625.1	Protein with signal anchor (AHRD V3.11 *** tr|A0A1Q3FXT2|A0A1Q3FXT2_CULTA). Similar to MCOT10441.0.MT. AED 0.06
DcitrP093775.1	DcitrP093775.1	ScVcwli_3513:237744-245395	0.433052	2.68558	-2.11409	6.67157e-05	0.00707871	>DcitrP093775.1.1 BTB/POZ domain-containing protein 9 (AHRD V3.11 *-* tr|A0A1W4XH47|A0A1W4XH47_AGRPL). AED 0.00	--	--	--	--	GO:0005515	protein binding	no KO assigned | (RefSeq) collagen alpha-1(III) chain	http://www.genome.jp/dbget-bin/www_bget?api:100168286	DcitrP093775.1	BTB/POZ domain-containing protein 9 (AHRD V3.11 *-* tr|A0A1W4XH47|A0A1W4XH47_AGRPL). AED 0.00
DcitrP072035.1	DcitrP072035.1	ScVcwli_2859:854688-858101	0.523291	3.25109	-2.13281	0.000171733	0.0144437	>DcitrP072035.1.1 WASH complex subunit strumpellin homolog-like Protein (AHRD V3.11 *** tr|D6WDB2|D6WDB2_TRICA). Similar to MCOT05182.0.CO XP_008484391.1. AED 0.07| InterPro:IPR019393,Pfam:PF10266| GO:0071203	GO:0015979	photosynthesis	GO:0009539//GO:0071203//GO:0009523//GO:0016020	photosystem II reaction center//WASH complex//photosystem II//membrane	--	--	K18464 WASH complex subunit strumpellin | (RefSeq) WASH complex subunit strumpellin	http://www.genome.jp/dbget-bin/www_bget?api:100165971	DcitrP072035.1	WASH complex subunit strumpellin homolog-like Protein (AHRD V3.11 *** tr|D6WDB2|D6WDB2_TRICA). Similar to MCOT05182.0.CO XP_008484391.1. AED 0.07
DcitrP034900.1	DcitrP034900.1	ScVcwli_1319:2878000-2884001	1.19858	7.50762	-2.144	3.04177e-08	1.28437e-05	>DcitrP034900.1.1 ACYPI004402 protein (AHRD V3.11 -** tr|C4WXF5|C4WXF5_ACYPI). AED 0.63	--	--	--	--	--	--	K15348 pleckstrin homology domain-containing family M member 2 | (RefSeq) uncharacterized LOC100163308	http://www.genome.jp/dbget-bin/www_bget?api:100163308	DcitrP034900.1	ACYPI004402 protein (AHRD V3.11 -** tr|C4WXF5|C4WXF5_ACYPI). AED 0.63
DcitrP059055.1	DcitrP059055.1	ScVcwli_2406:206934-236343	2.76902	17.4165	-2.14771	1.61764e-09	1.07964e-06	>DcitrP059055.1.1 Myd88 protein (AHRD V3.11 *-* tr|A0A0J7LAU8|A0A0J7LAU8_LASNI). Similar to MCOT23194.0.CO. AED 0.26	GO:0007165	signal transduction	--	--	GO:0005515	protein binding	--	--	DcitrP059055.1	Myd88 protein (AHRD V3.11 *-* tr|A0A0J7LAU8|A0A0J7LAU8_LASNI). Similar to MCOT23194.0.CO. AED 0.26
DcitrP045795.1	DcitrP045795.1	ScVcwli_1886:5014-23388	1.86125	11.2601	-2.15298	7.37041e-05	0.00752425	>DcitrP045795.1.1 CYP4C67 partial-RA. (AHRD V3.11 *** Cytochrome P450 tr|A0A288D097|A0A288D097_LOCMI). AED 0.16| InterPro:IPR001128,Pfam:PF00067| GO:0005506,GO:0016705,GO:0020037,GO:0055114	GO:0055114	oxidation-reduction process	--	--	GO:0016705//GO:0020037//GO:0005506	oxidoreductase activity, acting on paired donors, with incorporation or reduction of molecular oxygen//heme binding//iron ion binding	K14999 cytochrome P450 family 6 [EC:1.14.-.-] | (RefSeq) probable cytochrome P450 6a14	http://www.genome.jp/dbget-bin/www_bget?api:100162594	DcitrP045795.1	CYP4C67 partial-RA. (AHRD V3.11 *** Cytochrome P450 tr|A0A288D097|A0A288D097_LOCMI). AED 0.16
XLOC_015166	XLOC_015166	ScVcwli_2663:170598-175133	0.564645	3.70345	-2.16194	0.000115054	0.010533		--	--	--	--	--	--	--	--	--	--
DcitrP068445.1	DcitrP068445.1	ScVcwli_2739:667310-670109	0.539453	3.34224	-2.16999	0.00058053	0.0337093	>DcitrP068445.1.1 Tryptophanyl-tRNA synthetase, cytoplasmic (AHRD V3.11 *** tr|A0A2A3EKD1|A0A2A3EKD1_APICC). Similar to MCOT18373.1.CO XP_008484228.1. AED 0.03| InterPro:IPR002305,Pfam:PF00579| GO:0000166,GO:0004812,GO:0005524,GO:0006418	GO:0006418	tRNA aminoacylation for protein translation	--	--	GO:0000166//GO:0004812//GO:0005524	nucleotide binding//aminoacyl-tRNA ligase activity//ATP binding	K01867 tryptophanyl-tRNA synthetase [EC:6.1.1.2] | (RefSeq) tryptophanyl-tRNA synthetase-like	http://www.genome.jp/dbget-bin/www_bget?api:100164270	DcitrP068445.1	Tryptophanyl-tRNA synthetase, cytoplasmic (AHRD V3.11 *** tr|A0A2A3EKD1|A0A2A3EKD1_APICC). Similar to MCOT18373.1.CO XP_008484228.1. AED 0.03
DcitrP071430.1	DcitrP071430.1	ScVcwli_2849:257208-258546	1.33298	8.64715	-2.1824	0.00010374	0.00966842	>DcitrP071430.1.1 Protein FAM86A (AHRD V3.11 *** tr|A0A195E927|A0A195E927_9HYME). Similar to MCOT13741.0.CC XP_008469541.1. AED 0.05	GO:0006355	regulation of transcription, DNA-templated	GO:0005634//GO:0000124	nucleus//SAGA complex	GO:0018024//GO:0008168//GO:0003712	histone-lysine N-methyltransferase activity//methyltransferase activity//transcription cofactor activity	no KO assigned | (RefSeq) protein-lysine N-methyltransferase EEF2KMT	http://www.genome.jp/dbget-bin/www_bget?api:100162167	DcitrP071430.1	Protein FAM86A (AHRD V3.11 *** tr|A0A195E927|A0A195E927_9HYME). Similar to MCOT13741.0.CC XP_008469541.1. AED 0.05
DcitrP035090.1	DcitrP035090.1	ScVcwli_1319:3475023-3481725	4.4722	29.9809	-2.2066	1.16126e-09	8.28497e-07	>DcitrP035090.1.1 CCAAT/enhancer-binding protein gamma (AHRD V3.11 *-* tr|A0A067R927|A0A067R927_ZOONE). Similar to MCOT03373.0.CC XP_008468198.1. AED 0.18	GO:0006355//GO:0006323	regulation of transcription, DNA-templated//DNA packaging	GO:0005634	nucleus	GO:0003700//GO:0043565//GO:0003677	transcription factor activity, sequence-specific DNA binding//sequence-specific DNA binding//DNA binding	K10049 CCAAT/enhancer binding protein (C/EBP), gamma | (RefSeq) CCAAT/enhancer-binding protein gamma-like	http://www.genome.jp/dbget-bin/www_bget?api:100158872	DcitrP035090.1	CCAAT/enhancer-binding protein gamma (AHRD V3.11 *-* tr|A0A067R927|A0A067R927_ZOONE). Similar to MCOT03373.0.CC XP_008468198.1. AED 0.18||CCAAT/enhancer-binding protein gamma (AHRD V3.11 *-* tr|A0A067R927|A0A067R927_ZOONE). Similar to MCOT03373.0.CC XP_008468198.1. AED 0.09
DcitrP034905.1	DcitrP034905.1	ScVcwli_1319:2886463-2888792	1.06548	10.7201	-2.20786	0.000130835	0.0116179	>DcitrP034905.1.1 Unknown protein. Similar to MCOT18558.3.CT. AED 0.05	--	--	--	--	--	--	--	--	DcitrP034905.1	Unknown protein. Similar to MCOT18558.3.CT. AED 0.05||Unknown protein. Similar to MCOT18558.3.CT. AED 0.21
DcitrP083350.1	DcitrP083350.1	ScVcwli_3369:941887-970556	3.24094	21.1932	-2.23253	1.81045e-10	1.80805e-07	>DcitrP083350.1.1 Protein charybde (AHRD V3.11 *** tr|A0A067R397|A0A067R397_ZOONE). Similar to XP_008468653.1. AED 0.11| InterPro:IPR012918,Pfam:PF07809| GO:0005737,GO:0009968	GO:0055114//GO:0009968	oxidation-reduction process//negative regulation of signal transduction	GO:0005737	cytoplasm	GO:0004096//GO:0020037	catalase activity//heme binding	no KO assigned | (RefSeq) DNA damage-inducible transcript 4-like	http://www.genome.jp/dbget-bin/www_bget?api:100166939	DcitrP083350.1	Protein charybde (AHRD V3.11 *** tr|A0A067R397|A0A067R397_ZOONE). Similar to XP_008468653.1. AED 0.11
DcitrP068400.1	DcitrP068400.1	ScVcwli_2739:529419-533436	1.91523	13.1626	-2.26443	7.7932e-09	3.58314e-06	>DcitrP068400.1.1 Unknown protein. Similar to MCOT19376.0.CT. AED 0.06	GO:0006182//GO:0007165//GO:0006914//GO:0007067//GO:0051258//GO:0000921//GO:0030168	cGMP biosynthetic process//signal transduction//autophagy//mitotic nuclear division//protein polymerization//septin ring assembly//platelet activation	GO:0016021//GO:0005940//GO:0042729//GO:0072686//GO:0019028//GO:0019898//GO:0005577//GO:0019031//GO:0005737	integral component of membrane//septin ring//DASH complex//mitotic spindle//viral capsid//extrinsic component of membrane//fibrinogen complex//viral envelope//cytoplasm	GO:0030674//GO:0008092//GO:0004383//GO:0045502//GO:0005198//GO:0008855//GO:0042803//GO:0005102//GO:0008134	protein binding, bridging//cytoskeletal protein binding//guanylate cyclase activity//dynein binding//structural molecule activity//exodeoxyribonuclease VII activity//protein homodimerization activity//receptor binding//transcription factor binding	--	--	DcitrP068400.1	Unknown protein. Similar to MCOT19376.0.CT. AED 0.06
DcitrP045865.1	DcitrP045865.1	ScVcwli_1889:106604-108707	1.07227	7.51062	-2.27828	0.00011491	0.010533	>DcitrP045865.1.1 Ras (AHRD V3.11 *** tr|A0A0M4N074|A0A0M4N074_LEPDE). Similar to MCOT20060.0.CC XP_008468841.1. AED 0.11| InterPro:IPR001806,Pfam:PF00071| GO:0003924,GO:0005525	GO:0015684//GO:0007264//GO:0055114	ferrous iron transport//small GTPase mediated signal transduction//oxidation-reduction process	GO:0016021	integral component of membrane	GO:0005525//GO:0016491//GO:0030976//GO:0015093//GO:0003924//GO:0000287	GTP binding//oxidoreductase activity//thiamine pyrophosphate binding//ferrous iron transmembrane transporter activity//GTPase activity//magnesium ion binding	K07827 GTPase Kras | (RefSeq) K-ras-like	http://www.genome.jp/dbget-bin/www_bget?api:100159403	DcitrP045865.1	Ras (AHRD V3.11 *** tr|A0A0M4N074|A0A0M4N074_LEPDE). Similar to MCOT20060.0.CC XP_008468841.1. AED 0.11
DcitrP006120.1	DcitrP006120.1	ScVcwli_277:33028-42678	0.567688	4.1202	-2.38957	0.000380056	0.0259458	>DcitrP006120.1.1 Unknown protein. AED 0.05	--	--	--	--	--	--	--	--	DcitrP006120.1	Unknown protein. AED 0.05
DcitrP069135.1	DcitrP069135.1	ScVcwli_2777:1438692-1445433	0.287376	2.09718	-2.40144	0.00015241	0.0130845	>DcitrP069135.1.1 UDP-glucuronosyltransferase (AHRD V3.11 *** tr|L7WMY4|L7WMY4_LOCMI). AED 0.24| InterPro:IPR002213,Pfam:PF00201| GO:0008152,GO:0016758	GO:0008152//GO:0005975//GO:0030259	metabolic process//carbohydrate metabolic process//lipid glycosylation	GO:0019028	viral capsid	GO:0016758	transferase activity, transferring hexosyl groups	K00699 glucuronosyltransferase [EC:2.4.1.17] | (RefSeq) UDP-glucuronosyltransferase 2C1	http://www.genome.jp/dbget-bin/www_bget?api:100159580	DcitrP069135.1	UDP-glucuronosyltransferase (AHRD V3.11 *** tr|L7WMY4|L7WMY4_LOCMI). AED 0.22||UDP-glucuronosyltransferase (AHRD V3.11 *** tr|L7WMY4|L7WMY4_LOCMI). AED 0.24||UDP-glucuronosyltransferase (AHRD V3.11 *** tr|L7WMY4|L7WMY4_LOCMI). AED 0.26
DcitrP030290.1	DcitrP030290.1	ScVcwli_1131:15483-17304	4.72997	35.92	-2.42345	3.22298e-10	3.03106e-07	>DcitrP030290.1.1 Tubulin-folding cofactor B-like Protein (AHRD V3.11 *** tr|D6WA48|D6WA48_TRICA). Similar to MCOT16484.0.CC XP_008475897.1. AED 0.00	--	--	--	--	GO:0005515	protein binding	K17262 tubulin-folding cofactor B | (RefSeq) tubulin-folding cofactor B-like	http://www.genome.jp/dbget-bin/www_bget?api:100169239	DcitrP030290.1	Tubulin-folding cofactor B-like Protein (AHRD V3.11 *** tr|D6WA48|D6WA48_TRICA). Similar to MCOT16484.0.CC XP_008475897.1. AED 0.00
DcitrP039760.1	DcitrP039760.1	ScVcwli_1588:55993-58149	1.09833	8.13248	-2.43618	7.53981e-06	0.00129999	>DcitrP039760.1.1 Unknown protein. Similar to MCOT13563.0.CO XP_017298716.1. AED 0.00	--	--	--	--	--	--	--	--	DcitrP039760.1	Unknown protein. Similar to MCOT13563.0.CO XP_017298716.1. AED 0.00
DcitrP067050.1	DcitrP067050.1	ScVcwli_2677:175251-183235	0.969165	6.698	-2.43922	4.37673e-06	0.000846304	>DcitrP067050.1.1 DNA (cytosine-5)-methyltransferase (AHRD V3.11 *-* tr|A0A0L7RI38|A0A0L7RI38_9HYME). Similar to MCOT16028.2.CO XP_017300429.1. AED 0.23,Pfam:PF00145	--	--	--	--	--	--	K00558 DNA (cytosine-5)-methyltransferase 1 [EC:2.1.1.37] | (RefSeq) DNA (cytosine-5)-methyltransferase PliMCI	http://www.genome.jp/dbget-bin/www_bget?api:103308886	DcitrP067050.1	DNA (cytosine-5)-methyltransferase (AHRD V3.11 *-* tr|A0A0L7RI38|A0A0L7RI38_9HYME). Similar to MCOT16028.2.CO XP_017300429.1. AED 0.23||DNA (cytosine-5)-methyltransferase (AHRD V3.11 *-* tr|A0A154PR63|A0A154PR63_9HYME). Similar to MCOT16028.2.CO XP_017300429.1. AED 0.09
DcitrP023265.1	DcitrP023265.1	ScVcwli_943:625206-626980	2.46514	18.9202	-2.45045	1.46807e-08	6.32798e-06	>DcitrP023265.1.1 Phosphatase and actin regulator 4 (AHRD V3.11 *-* tr|A0A194RGH2|A0A194RGH2_PAPMA). Similar to MCOT18987.0.CC XP_017299859.1. AED 0.06	GO:0006355	regulation of transcription, DNA-templated	GO:0016021//GO:0005634	integral component of membrane//nucleus	GO:0005515	protein binding	--	--	DcitrP023265.1	Phosphatase and actin regulator 4 (AHRD V3.11 *-* tr|A0A194RGH2|A0A194RGH2_PAPMA). Similar to MCOT18987.0.CC XP_017299859.1. AED 0.06
XLOC_019832	XLOC_019832	ScVcwli_3294:402856-413501	0.299954	2.17556	-2.45342	7.90266e-06	0.00132932		--	--	--	--	--	--	--	--	--	--
DcitrP045070.1	DcitrP045070.1	ScVcwli_1840:264478-266005	2.50685	19.5749	-2.45874	3.14545e-08	1.30159e-05	>DcitrP045070.1.1 Protein preli-like (AHRD V3.11 *** tr|A0A067RNI5|A0A067RNI5_ZOONE). Similar to MCOT21161.0.CC XP_017300109.1. AED 0.07| InterPro:IPR006797,Pfam:PF04707	--	--	--	--	--	--	no KO assigned | (RefSeq) PRELI domain-containing protein 1, mitochondrial-like	http://www.genome.jp/dbget-bin/www_bget?api:100160645	DcitrP045070.1	Protein preli-like (AHRD V3.11 *** tr|A0A067RNI5|A0A067RNI5_ZOONE). Similar to MCOT21161.0.CC XP_017300109.1. AED 0.07
DcitrP038950.1	DcitrP038950.1	ScVcwli_1535:1568214-1594484	0.553806	4.59605	-2.4661	8.75638e-10	6.62813e-07	>DcitrP038950.1.1 Origin recognition complex subunit 3 (AHRD V3.11 *** tr|A0A195D6K5|A0A195D6K5_9HYME). Similar to MCOT01771.2.CT. AED 0.30| InterPro:IPR020795,Pfam:PF07034| GO:0003677,GO:0005664,GO:0006260	GO:0006260	DNA replication	GO:0005664	nuclear origin of replication recognition complex	GO:0003677//GO:0016787//GO:0005515	DNA binding//hydrolase activity//protein binding	K02605 origin recognition complex subunit 3 | (RefSeq) origin recognition complex subunit 3	http://www.genome.jp/dbget-bin/www_bget?api:100164678	DcitrP038950.1	Origin recognition complex subunit 3 (AHRD V3.11 *** tr|W5J683|W5J683_ANODA). Similar to MCOT04071.0.CT. AED 0.00||Origin recognition complex subunit 3 (AHRD V3.11 *** tr|A0A195D6K5|A0A195D6K5_9HYME). Similar to MCOT01771.2.CT. AED 0.30
DcitrP094795.1	DcitrP094795.1	ScVcwli_3525:46596-48500	1.09992	8.67043	-2.48508	1.41055e-06	0.000343344	>DcitrP094795.1.1 Protein preli-like (AHRD V3.11 *-* tr|A0A067RNI5|A0A067RNI5_ZOONE). AED 0.00| InterPro:IPR006797,Pfam:PF04707	--	--	--	--	--	--	no KO assigned | (RefSeq) PRELI domain-containing protein 1, mitochondrial-like	http://www.genome.jp/dbget-bin/www_bget?api:100160645	DcitrP094795.1	Protein preli-like (AHRD V3.11 *-* tr|A0A067RNI5|A0A067RNI5_ZOONE). AED 0.00
DcitrP024755.1	DcitrP024755.1	ScVcwli_991:250013-257510	0.236369	1.89554	-2.49662	7.8499e-06	0.00132932	>DcitrP024755.1.1 Pol polyprotein (AHRD V3.11 *-* tr|A0A0A9YQQ8|A0A0A9YQQ8_LYGHE). Similar to MCOT18856.3.CO XP_017300662.1. AED 0.01	GO:0015074	DNA integration	--	--	--	--	no KO assigned | (RefSeq) uncharacterized LOC103310118	http://www.genome.jp/dbget-bin/www_bget?api:103310118	DcitrP024755.1	Pol polyprotein (AHRD V3.11 *-* tr|A0A0A9YQQ8|A0A0A9YQQ8_LYGHE). Similar to MCOT18856.3.CO XP_017300662.1. AED 0.01
DcitrP011585.1	DcitrP011585.1	ScVcwli_483:1148780-1164484	0.1624	1.4431	-2.52489	0.000311658	0.0226253	>DcitrP011585.1.1 Aminopeptidase (AHRD V3.11 *-* tr|X1WKP5|X1WKP5_ACYPI). AED 0.35	--	--	--	--	GO:0008270//GO:0008237	zinc ion binding//metallopeptidase activity	K11140 aminopeptidase N [EC:3.4.11.2] | (RefSeq) aminopeptidase N	http://www.genome.jp/dbget-bin/www_bget?api:100163851	DcitrP011585.1	Aminopeptidase (AHRD V3.11 *-* tr|X1WKP5|X1WKP5_ACYPI). AED 0.35
DcitrP007745.1	DcitrP007745.1	ScVcwli_350:1445182-1447734	1.92073	15.6524	-2.53984	7.38556e-09	3.47289e-06	>DcitrP007745.1.1 Nucleolar complex protein 4-B (AHRD V3.11 *-* tr|W8CCQ3|W8CCQ3_CERCA). AED 0.20	GO:0043248	proteasome assembly	--	--	--	--	K14771 U3 small nucleolar RNA-associated protein 19 | (RefSeq) nucleolar complex protein 4 homolog B	http://www.genome.jp/dbget-bin/www_bget?api:100163373	DcitrP007745.1	Nucleolar complex protein 4-B (AHRD V3.11 *-* tr|W8CCQ3|W8CCQ3_CERCA). AED 0.20
DcitrP083545.1	DcitrP083545.1	ScVcwli_3369:1536747-1543252	3.61088	30.7422	-2.59237	3.62346e-11	4.99796e-08	>DcitrP083545.1.1 Protein charybde (AHRD V3.11 *** tr|A0A067R397|A0A067R397_ZOONE). Similar to MCOT22529.0.CC XP_008468653.1. AED 0.02| InterPro:IPR012918,Pfam:PF07809| GO:0005737,GO:0009968	GO:0009968	negative regulation of signal transduction	GO:0005737	cytoplasm	GO:0003723//GO:0008270	RNA binding//zinc ion binding	no KO assigned | (RefSeq) DNA damage-inducible transcript 4-like	http://www.genome.jp/dbget-bin/www_bget?api:100166939	DcitrP083545.1	Protein charybde (AHRD V3.11 *** tr|A0A067R397|A0A067R397_ZOONE). Similar to MCOT22529.0.CC XP_008468653.1. AED 0.02
DcitrP057485.1	DcitrP057485.1	ScVcwli_2325:315190-321433	0.147584	1.33876	-2.59447	0.000360817	0.0251647	>DcitrP057485.1.1 AGAP011571-PA-like protein (AHRD V3.11 *-* tr|A0A084VYW1|A0A084VYW1_ANOSI). Similar to MCOT01747.0.CT XP_008480002.1. AED 0.03	--	--	--	--	--	--	no KO assigned | (RefSeq) uncharacterized LOC100167416	http://www.genome.jp/dbget-bin/www_bget?api:100167416	DcitrP057485.1	AGAP011571-PA-like protein (AHRD V3.11 *-* tr|A0A084VYW1|A0A084VYW1_ANOSI). Similar to MCOT01747.0.CT XP_008480002.1. AED 0.03
DcitrP052085.1	DcitrP052085.1	ScVcwli_2161:785168-788136	0.752701	6.76517	-2.69567	4.37108e-06	0.000846304	>DcitrP052085.1.1 CG8818-PA (AHRD V3.11 *-* FBpp0087052). Similar to MCOT23210.0.CO. AED 0.11	--	--	--	--	--	--	no KO assigned | (RefSeq) uncharacterized LOC100159789	http://www.genome.jp/dbget-bin/www_bget?api:100159789	DcitrP052085.1	CG8818-PA (AHRD V3.11 *-* FBpp0087052). Similar to MCOT23210.0.CO. AED 0.11
DcitrP057940.1	DcitrP057940.1	ScVcwli_2351:34961-38787	0.901354	8.64595	-2.79543	3.80782e-08	1.48649e-05	>DcitrP057940.1.1 Syntaxin-18 (AHRD V3.11 *** tr|E2ABW1|E2ABW1_CAMFO). Similar to MCOT01292.2.CC XP_008479390.1. AED 0.01	GO:0007130//GO:0007283//GO:0007131//GO:0006355	synaptonemal complex assembly//spermatogenesis//reciprocal meiotic recombination//regulation of transcription, DNA-templated	--	--	GO:0005515//GO:0043565//GO:0003700	protein binding//sequence-specific DNA binding//transcription factor activity, sequence-specific DNA binding	K11314 transcriptional adapter 2-alpha | (RefSeq) transcriptional adapter 2-alpha	http://www.genome.jp/dbget-bin/www_bget?api:100165438	DcitrP057940.1	Syntaxin-18 (AHRD V3.11 *** tr|E2ABW1|E2ABW1_CAMFO). Similar to MCOT01292.2.CC XP_008479390.1. AED 0.01
DcitrP070000.1	DcitrP070000.1	ScVcwli_2811:155520-166248	0.0604947	0.612904	-2.82391	0.000114054	0.010533	>DcitrP070000.1.1 Unknown protein. Similar to MCOT22714.2.CC XP_008468884.2. AED 0.00	--	--	--	--	--	--	--	--	DcitrP070000.1	Unknown protein. Similar to MCOT22714.2.CC XP_008468884.2. AED 0.00
DcitrP009475.1	DcitrP009475.1	ScVcwli_425:116848-119476	2.70629	26.4019	-2.824	8.01545e-10	6.37845e-07	>DcitrP009475.1.1 Syntaxin-18 (AHRD V3.11 *** tr|E2ABW1|E2ABW1_CAMFO). Similar to MCOT01292.2.CC XP_008479390.1. AED 0.25	GO:0006355	regulation of transcription, DNA-templated	--	--	GO:0005515//GO:0003700//GO:0043565	protein binding//transcription factor activity, sequence-specific DNA binding//sequence-specific DNA binding	K08492 syntaxin 18 | (RefSeq) syntaxin-18	http://www.genome.jp/dbget-bin/www_bget?api:100575724	DcitrP009475.1	Syntaxin-18 (AHRD V3.11 *** tr|E2ABW1|E2ABW1_CAMFO). Similar to MCOT01292.2.CC XP_008479390.1. AED 0.25
DcitrP058230.1	DcitrP058230.1	ScVcwli_2374:612173-617068	0.183549	1.94902	-2.86332	4.311e-06	0.000846304	>DcitrP058230.1.1 Leucine zipper putative tumor suppressor 2 homolog-like Protein (AHRD V3.11 *** tr|D6WBJ3|D6WBJ3_TRICA). Similar to MCOT06304.0.CO. AED 0.16	GO:0016032	viral process	GO:0005737//GO:0019898	cytoplasm//extrinsic component of membrane	GO:0008092	cytoskeletal protein binding	no KO assigned | (RefSeq) leucine zipper putative tumor suppressor 2 homolog	http://www.genome.jp/dbget-bin/www_bget?api:100158841	DcitrP058230.1	Leucine zipper putative tumor suppressor 2 homolog-like Protein (AHRD V3.11 *** tr|D6WBJ3|D6WBJ3_TRICA). Similar to MCOT06304.0.CO. AED 0.16
DcitrP091510.1	DcitrP091510.1	ScVcwli_3487:321723-332612	0.349791	3.72944	-2.93033	1.74651e-06	0.000410628	>DcitrP091510.1.1 natterin-3-like-RA. (AHRD V3.11 *-* Natterin-3 tr|A0A0A1X884|A0A0A1X884_ZEUCU). Similar to MCOT23255.0.CO. AED 0.09	GO:0005986//GO:0009405//GO:0016032	sucrose biosynthetic process//pathogenesis//viral process	GO:0005576	extracellular region	GO:0050307	sucrose-phosphate phosphatase activity	no KO assigned | (RefSeq) uncharacterized protein LOC100164577	http://www.genome.jp/dbget-bin/www_bget?api:100164577	DcitrP091510.1	natterin-3-like-RA. (AHRD V3.11 *-* Natterin-3 tr|A0A0A1X884|A0A0A1X884_ZEUCU). Similar to MCOT23255.0.CO. AED 0.09
DcitrP034980.1	DcitrP034980.1	ScVcwli_1319:2954475-2955957	0.658586	7.33054	-2.94412	2.19246e-05	0.00302413	>DcitrP034980.1.1 Serum response factor (AHRD V3.11 *-* tr|Q9XYR1|Q9XYR1_JUNCO). Similar to MCOT11952.0.OO XP_008487915.1. AED 0.00	--	--	--	--	GO:0046983//GO:0003677	protein dimerization activity//DNA binding	no KO assigned | (RefSeq) uncharacterized LOC100164738	http://www.genome.jp/dbget-bin/www_bget?api:100164738	DcitrP034980.1	Serum response factor (AHRD V3.11 *-* tr|Q9XYR1|Q9XYR1_JUNCO). Similar to MCOT11952.0.OO XP_008487915.1. AED 0.00
DcitrP081950.1	DcitrP081950.1	ScVcwli_3338:1294527-1298868	0.579056	6.47489	-2.96629	0.00040352	0.0268451	>DcitrP081950.1.1 Clavesin-2 (AHRD V3.11 *** tr|A0A0A9WH41|A0A0A9WH41_LYGHE). AED 0.37	--	--	--	--	--	--	no KO assigned | (RefSeq) clavesin-2	http://www.genome.jp/dbget-bin/www_bget?api:100168730	DcitrP081950.1	Clavesin-2 (AHRD V3.11 *** tr|A0A0A9WH41|A0A0A9WH41_LYGHE). AED 0.37
DcitrP045790.1	DcitrP045790.1	ScVcwli_1886:670-2047	1.58627	18.1351	-3.07848	4.16587e-05	0.00476928	>DcitrP045790.1.1 CYP6KB1-RA. (AHRD V3.11 *** Cytochrome P450 tr|A0A288D097|A0A288D097_LOCMI). AED 0.03| InterPro:IPR001128,Pfam:PF00067| GO:0005506,GO:0016705,GO:0020037,GO:0055114	GO:0055114	oxidation-reduction process	--	--	GO:0005506//GO:0020037//GO:0016705	iron ion binding//heme binding//oxidoreductase activity, acting on paired donors, with incorporation or reduction of molecular oxygen	K14999 cytochrome P450 family 6 [EC:1.14.-.-] | (RefSeq) probable cytochrome P450 6a13	http://www.genome.jp/dbget-bin/www_bget?api:100165972	DcitrP045790.1	CYP6KB1-RA. (AHRD V3.11 *** Cytochrome P450 tr|A0A288D097|A0A288D097_LOCMI). AED 0.03
DcitrP007730.1	DcitrP007730.1	ScVcwli_350:1403160-1404484	0.299932	3.89163	-3.22957	0.000180527	0.0148685	>DcitrP007730.1.1 Nucleolar complex protein 4 homolog B (AHRD V3.11 *-* tr|A0A0A1X3T4|A0A0A1X3T4_ZEUCU). AED 0.13	GO:0043248	proteasome assembly	--	--	--	--	K14771 U3 small nucleolar RNA-associated protein 19 | (RefSeq) nucleolar complex protein 4 homolog B	http://www.genome.jp/dbget-bin/www_bget?api:100163373	DcitrP007730.1	Nucleolar complex protein 4 homolog B (AHRD V3.11 *-* tr|A0A0A1X3T4|A0A0A1X3T4_ZEUCU). AED 0.13
DcitrP036210.1	DcitrP036210.1	ScVcwli_1380:162520-164542	0.469832	7.94986	-3.57165	6.94739e-09	3.34282e-06	>DcitrP036210.1.1 AGAP005135-PA (AHRD V3.11 *-* tr|Q5TST0|Q5TST0_ANOGA). Similar to MCOT21200.1.CC XP_017305249.1. AED 0.02	--	--	--	--	GO:0046872//GO:0016462//GO:0005509	metal ion binding//pyrophosphatase activity//calcium ion binding	--	--	DcitrP036210.1	AGAP005135-PA (AHRD V3.11 *-* tr|Q5TST0|Q5TST0_ANOGA). Similar to MCOT21200.1.CC XP_017305249.1. AED 0.02
DcitrP049225.1	DcitrP049225.1	ScVcwli_2037:423836-450372	2.92314	52.1266	-3.70474	1.83661e-22	3.79995e-18	>DcitrP049225.1.1 Unknown protein. Similar to XP_017305230.1. AED 0.29	--	--	GO:0016021	integral component of membrane	GO:0004190	aspartic-type endopeptidase activity	--	--	DcitrP049225.1	Unknown protein. Similar to XP_017305230.1. AED 0.25||Unknown protein. Similar to XP_017305230.1. AED 0.29
DcitrP049350.1	DcitrP049350.1	ScVcwli_2037:805506-807464	2.09442	39.833	-3.76965	6.09531e-19	4.20373e-15	>DcitrP049350.1.1 Unknown protein. Similar to XP_017305230.1. AED 0.10	--	--	GO:0016021	integral component of membrane	GO:0004190	aspartic-type endopeptidase activity	--	--	DcitrP049350.1	Unknown protein. Similar to XP_017305230.1. AED 0.10
DcitrP049360.1	DcitrP049360.1	ScVcwli_2037:825453-826976	4.06929	78.1624	-3.79529	3.22312e-18	1.66716e-14	>DcitrP049360.1.1 Unknown protein. Similar to XP_017305230.1. AED 0.27	--	--	GO:0016021	integral component of membrane	GO:0004190	aspartic-type endopeptidase activity	--	--	DcitrP049360.1	Unknown protein. Similar to XP_017305230.1. AED 0.27
XLOC_013565	XLOC_013565	ScVcwli_2516:1486-3726	0.155246	3.2519	-3.82142	4.90165e-05	0.00542327		--	--	--	--	--	--	--	--	--	--
DcitrP033120.1	DcitrP033120.1	ScVcwli_1257:237927-250748	0.029027	0.794289	-4.23002	1.93909e-06	0.000440876	>DcitrP033120.1.1 Tyrosine protein kinase receptor torso-RA. (AHRD V3.11 *-* Serine/threonine-protein kinase ICK tr|A0A151X569|A0A151X569_9HYME). Similar to MCOT23058.0.CO. AED 0.09	GO:0006468	protein phosphorylation	GO:0016020	membrane	GO:0005524//GO:0016773//GO:0004672	ATP binding//phosphotransferase activity, alcohol group as acceptor//protein kinase activity	K08829 male germ cell-associated kinase [EC:2.7.11.22] | (RefSeq) serine/threonine-protein kinase MAK-like	http://www.genome.jp/dbget-bin/www_bget?api:100167962	DcitrP033120.1	Tyrosine protein kinase receptor torso-RA. (AHRD V3.11 *-* Serine/threonine-protein kinase ICK tr|A0A151X569|A0A151X569_9HYME). Similar to MCOT23058.0.CO. AED 0.09
DcitrP068390.1	DcitrP068390.1	ScVcwli_2739:504168-509063	0.409672	12.2173	-4.417	0.000181096	0.0148685	>DcitrP068390.1.1 cathepsin W-like protein 2-RA. (AHRD V3.11 *-* Cathepsin L-like proteinase tr|V5H1B4|V5H1B4_ANOGL). Similar to MCOT16844.0.CT. AED 0.02| InterPro:IPR000668,Pfam:PF00112| GO:0006508,GO:0008234	GO:0006508	proteolysis	--	--	GO:0008234//GO:0004197	cysteine-type peptidase activity//cysteine-type endopeptidase activity	K01373 cathepsin F [EC:3.4.22.41] | (RefSeq) Ctsf; cathepsin F	http://www.genome.jp/dbget-bin/www_bget?api:100158959	DcitrP068390.1	cathepsin W-like protein 2-RA. (AHRD V3.11 *-* Cathepsin L-like proteinase tr|V5H1B4|V5H1B4_ANOGL). Similar to MCOT16844.0.CT. AED 0.02||cathepsin W-like protein 2-RB. (AHRD V3.11 *-* Cathepsin L-like proteinase tr|V5H1B4|V5H1B4_ANOGL). Similar to MCOT16844.0.CT. AED 0.03
XLOC_006498	XLOC_006498	ScVcwli_1697:314831-317254	0.989688	28.9311	-4.45187	9.19083e-07	0.000237698		--	--	--	--	--	--	--	--	--	--
DcitrP023525.1	DcitrP023525.1	ScVcwli_950:368242-369887	1.04969	37.8512	-4.55089	4.99919e-10	4.19135e-07	>DcitrP023525.1.1 alpha-crystallin A chain-RA. (AHRD V3.11 *** Protein lethal(2)essential for life tr|A0A146LAQ3|A0A146LAQ3_LYGHE). Similar to MCOT14808.2.CC. AED 0.00	--	--	--	--	GO:0005212	structural constituent of eye lens	K09542 crystallin, alpha B | (RefSeq) protein lethal(2)essential for life	http://www.genome.jp/dbget-bin/www_bget?api:100169331	DcitrP023525.1	alpha-crystallin A chain-RA. (AHRD V3.11 *** Protein lethal(2)essential for life tr|A0A146LAQ3|A0A146LAQ3_LYGHE). Similar to MCOT14808.2.CC. AED 0.00
XLOC_014989	XLOC_014989	ScVcwli_2646:115620-120773	0.0799915	2.73616	-4.55393	0.000149111	0.0129084		--	--	--	--	--	--	--	--	--	--
DcitrP012970.1	DcitrP012970.1	ScVcwli_521:1716248-1718332	0.120472	5.21196	-4.83921	1.98161e-05	0.00275164	>DcitrP012970.1.1 Mite allergen Der p 7 (AHRD V3.11 *** tr|A0A0A9XCX9|A0A0A9XCX9_LYGHE). AED 0.19| InterPro:IPR020234,Pfam:PF16984	--	--	--	--	--	--	--	--	DcitrP012970.1	Mite allergen Der p 7 (AHRD V3.11 *** tr|A0A0A9XCX9|A0A0A9XCX9_LYGHE). AED 0.19
XLOC_024019	XLOC_024019	ScVcwli_3487:1-6428	0.0152875	0.912748	-5.32372	8.69306e-05	0.00848393		--	--	--	--	--	--	--	--	--	--
DcitrP009555.1	DcitrP009555.1	ScVcwli_425:355042-360569	0.036114	3.29611	-5.68535	0.000562692	0.0330741	>DcitrP009555.1.1 Cathepsin F Like cysteine proteinase partial-RA. (AHRD V3.11 *** Cathepsin B tr|R4WR66|R4WR66_RIPPE). Similar to MCOT14013.3.CT. AED 0.01| InterPro:IPR000668,Pfam:PF00112| GO:0006508,GO:0008234	GO:0006508//GO:0050790	proteolysis//regulation of catalytic activity	--	--	GO:0004197//GO:0008234	cysteine-type endopeptidase activity//cysteine-type peptidase activity	K01363 cathepsin B [EC:3.4.22.1] | (RefSeq) Catb-5880; cathepsin B-5880	http://www.genome.jp/dbget-bin/www_bget?api:100144788	DcitrP009555.1	Cathepsin F Like cysteine proteinase partial-RA. (AHRD V3.11 *** Cathepsin B tr|R4WR66|R4WR66_RIPPE). Similar to MCOT14013.3.CT. AED 0.01||Cathepsin F Like cysteine proteinase partial-RB. (AHRD V3.11 *** Cathepsin B tr|R4WR66|R4WR66_RIPPE). Similar to MCOT14013.3.CT. AED 0.12
DcitrP081710.1	DcitrP081710.1	ScVcwli_3338:379750-389517	0.129451	10.8806	-5.77069	2.54341e-09	1.50352e-06	>DcitrP081710.1.1 39S ribosomal protein L51, mitochondrial (AHRD V3.11 *** tr|E2BNG5|E2BNG5_HARSA). Similar to MCOT18018.0.CC XP_008479720.1. AED 0.28| InterPro:IPR019373,Pfam:PF10244| GO:0003735	--	--	--	--	--	--	K17432 large subunit ribosomal protein L51 | (RefSeq) 39S ribosomal protein L51, mitochondrial	http://www.genome.jp/dbget-bin/www_bget?api:100168632	DcitrP081710.1	39S ribosomal protein L51, mitochondrial (AHRD V3.11 *** tr|E2BNG5|E2BNG5_HARSA). Similar to MCOT18018.0.CC XP_008479720.1. AED 0.28||39S ribosomal protein L51, mitochondrial (AHRD V3.11 *** tr|E2BNG5|E2BNG5_HARSA). AED 0.05
DcitrP019625.1	DcitrP019625.1	ScVcwli_839:187163-194010	0.0058625	0.582957	-5.82448	8.04954e-05	0.00804565	>DcitrP019625.1.1 Legumain (AHRD V3.11 *** tr|A0A146LPG0|A0A146LPG0_LYGHE). Similar to MCOT01720.0.CO. AED 0.20| InterPro:IPR001096,Pfam:PF01650| GO:0006508,GO:0008233	GO:0006508	proteolysis	--	--	GO:0008233	peptidase activity	K01369 legumain [EC:3.4.22.34] | (RefSeq) legumain-like	http://www.genome.jp/dbget-bin/www_bget?api:100168946	DcitrP019625.1	Legumain (AHRD V3.11 *** tr|A0A146LPG0|A0A146LPG0_LYGHE). Similar to MCOT01720.0.CO. AED 0.20
DcitrP006220.1	DcitrP006220.1	ScVcwli_284:698928-710607	0.153367	25.8411	-6.72077	4.09265e-07	0.000114428	>DcitrP006220.1.1 Alkaline phosphatase (AHRD V3.11 *** tr|A0A067QT98|A0A067QT98_ZOONE). Similar to MCOT15347.0.CC XP_008479449.1. AED 0.02| InterPro:IPR001952,Pfam:PF00245| GO:0008152,GO:0016791	GO:0008152	metabolic process	--	--	GO:0046872//GO:0003824//GO:0016791	metal ion binding//catalytic activity//phosphatase activity	K01077 alkaline phosphatase [EC:3.1.3.1] | (RefSeq) membrane-bound alkaline phosphatase	http://www.genome.jp/dbget-bin/www_bget?api:100165509	DcitrP006220.1	Alkaline phosphatase (AHRD V3.11 *** tr|A0A067QT98|A0A067QT98_ZOONE). Similar to MCOT15347.0.CC XP_008479449.1. AED 0.18||Alkaline phosphatase (AHRD V3.11 *** tr|A0A067QT98|A0A067QT98_ZOONE). Similar to MCOT15347.0.CC XP_008479449.1. AED 0.02||Alkaline phosphatase (AHRD V3.11 *** tr|A0A067QT98|A0A067QT98_ZOONE). Similar to MCOT15347.0.CC XP_008479449.1. AED 0.19||Alkaline phosphatase (AHRD V3.11 …
DcitrP091865.1	DcitrP091865.1	ScVcwli_3489:473791-482750	0.0086685	1.59341	-6.92749	4.69712e-05	0.00522492	>DcitrP091865.1.1 Maltase (AHRD V3.11 *** tr|A0A1S4H0G5|A0A1S4H0G5_ANOGA). Similar to MCOT22376.2.CT. AED 0.04| InterPro:IPR006047,Pfam:PF00128| GO:0003824,GO:0005975	GO:0005975	carbohydrate metabolic process	--	--	GO:0003824//GO:0043169	catalytic activity//cation binding	no KO assigned | (RefSeq) maltase-like	http://www.genome.jp/dbget-bin/www_bget?api:100159394	DcitrP091865.1	Maltase (AHRD V3.11 *** tr|A0A1S4H0G5|A0A1S4H0G5_ANOGA). Similar to MCOT22376.2.CT. AED 0.04
DcitrP086965.1	DcitrP086965.1	ScVcwli_3429:215323-220834	0	0.204795	-7.41908	0.000595256	0.0340217	>DcitrP086965.1.1 TNF receptor-associated factor 6 (AHRD V3.11 *-* tr|A0A1W4W6B8|A0A1W4W6B8_AGRPL). AED 0.08	GO:0016567	protein ubiquitination	GO:0005680	anaphase-promoting complex	GO:0046872//GO:0008270//GO:0004842//GO:0005515	metal ion binding//zinc ion binding//ubiquitin-protein transferase activity//protein binding	no KO assigned | (RefSeq) TNF receptor-associated factor 6	http://www.genome.jp/dbget-bin/www_bget?api:100575177	DcitrP086965.1	TNF receptor-associated factor 6 (AHRD V3.11 *-* tr|A0A1W4W6B8|A0A1W4W6B8_AGRPL). AED 0.08
DcitrP036010.1	DcitrP036010.1	ScVcwli_1367:76581-78244	0.0169397	9.89111	-8.12086	1.64613e-05	0.00234885	>DcitrP036010.1.1 Salivary cysteine-rich peptide (AHRD V3.11 *** tr|Q2F5L7|Q2F5L7_BOMMO). Similar to MCOT10290.0.OO XP_017303632.1. AED 0.25	--	--	GO:0005576	extracellular region	GO:0030414	peptidase inhibitor activity	--	--	DcitrP036010.1	Salivary cysteine-rich peptide (AHRD V3.11 *** tr|Q2F5L7|Q2F5L7_BOMMO). Similar to MCOT10290.0.OO XP_017303632.1. AED 0.25
DcitrP084720.1	DcitrP084720.1	ScVcwli_3393:436853-485692	0	0.0401245	-8.14568	4.44604e-05	0.0050267	>DcitrP084720.1.1 Pro-resilin (AHRD V3.11 *-* tr|A0A067R5H3|A0A067R5H3_ZOONE). Similar to XP_008485894.1. AED 0.24	--	--	--	--	GO:0042302	structural constituent of cuticle	--	--	DcitrP084720.1	Pro-resilin (AHRD V3.11 *-* tr|A0A067R5H3|A0A067R5H3_ZOONE). Similar to XP_008485894.1. AED 0.26||Pro-resilin (AHRD V3.11 *-* tr|A0A067R5H3|A0A067R5H3_ZOONE). Similar to XP_008485894.1. AED 0.24
DcitrP043425.1	DcitrP043425.1	ScVcwli_1724:194992-214634	0	0.0952868	-8.16327	0.000825803	0.0434755	>DcitrP043425.1.1 Alpha-catulin (AHRD V3.11 *** tr|A0A151K0G0|A0A151K0G0_9HYME). AED 0.09	GO:0007155	cell adhesion	GO:0019031	viral envelope	GO:0051015	actin filament binding	no KO assigned | (RefSeq) alpha-catulin	http://www.genome.jp/dbget-bin/www_bget?api:100169341	DcitrP043425.1	Alpha-catulin (AHRD V3.11 *** tr|A0A151K0G0|A0A151K0G0_9HYME). AED 0.09
DcitrP059455.1	DcitrP059455.1	ScVcwli_2431:39187-46071	0	0.278085	-8.25256	0.000597288	0.0340309	>DcitrP059455.1.1 DNA/RNA non-specific endonuclease (AHRD V3.11 *** tr|A0A219LVU9|A0A219LVU9_LAOST). AED 0.01	--	--	--	--	GO:0016787//GO:0046872//GO:0003676	hydrolase activity//metal ion binding//nucleic acid binding	no KO assigned | (RefSeq) uncharacterized LOC100167701	http://www.genome.jp/dbget-bin/www_bget?api:100167701	DcitrP059455.1	DNA/RNA non-specific endonuclease (AHRD V3.11 *** tr|A0A219LVU9|A0A219LVU9_LAOST). AED 0.01
DcitrP033665.1	DcitrP033665.1	ScVcwli_1272:271663-273620	0	0.958581	-8.25825	3.15567e-05	0.00384283	>DcitrP033665.1.1 Unknown protein. AED 0.63	GO:0006887//GO:0048278	exocytosis//vesicle docking	GO:0019031//GO:0005737	viral envelope//cytoplasm	GO:0003723	RNA binding	--	--	DcitrP033665.1	Unknown protein. AED 0.63
DcitrP060625.1	DcitrP060625.1	ScVcwli_2457:735449-740345	0	0.433356	-8.27694	0.000650826	0.0364921	>DcitrP060625.1.1 Syntaxin-binding protein 5 (AHRD V3.11 *-* tr|A0A151WX22|A0A151WX22_9HYME). Similar to MCOT14441.1.CO XP_017300035.1. AED 0.42	GO:0008277//GO:0006886	regulation of G-protein coupled receptor protein signaling pathway//intracellular protein transport	GO:0016021	integral component of membrane	GO:0008565	protein transporter activity	K08518 syntaxin-binding protein 5 | (RefSeq) syntaxin-binding protein 5	http://www.genome.jp/dbget-bin/www_bget?api:100159393	DcitrP060625.1	Syntaxin-binding protein 5 (AHRD V3.11 *-* tr|A0A151WX22|A0A151WX22_9HYME). Similar to MCOT14441.1.CO XP_017300035.1. AED 0.42
DcitrP058740.1	DcitrP058740.1	ScVcwli_2379:323123-335651	0	0.200226	-8.58227	2.45485e-06	0.000535382	>DcitrP058740.1.1 Pol polyprotein (AHRD V3.11 *-* tr|A0A0J7K7I7|A0A0J7K7I7_LASNI). AED 0.13	--	--	--	--	--	--	no KO assigned | (RefSeq) uncharacterized protein K02A2.6-like	http://www.genome.jp/dbget-bin/www_bget?api:103308202	DcitrP058740.1	Pol polyprotein (AHRD V3.11 *-* tr|A0A0J7K7I7|A0A0J7K7I7_LASNI). AED 0.13
XLOC_033970	XLOC_033970	ScVcwli_921:470790-475434	0	0.622316	-8.64096	0.000185379	0.01516		--	--	--	--	--	--	--	--	--	--
DcitrP015530.1	DcitrP015530.1	ScVcwli_620:1901742-1910393	0.0848997	57.9242	-8.69291	2.69819e-06	0.000581516	>DcitrP015530.1.1 Apolipoprotein D (AHRD V3.11 *** tr|A0A0A1XBP1|A0A0A1XBP1_ZEUCU). AED 0.12	--	--	--	--	--	--	K03098 apolipoprotein D and lipocalin family protein | (RefSeq) apolipoprotein D	http://www.genome.jp/dbget-bin/www_bget?api:100572774	DcitrP015530.1	Apolipoprotein D (AHRD V3.11 *** tr|A0A0A1XBP1|A0A0A1XBP1_ZEUCU). AED 0.12
DcitrP068425.1	DcitrP068425.1	ScVcwli_2739:494267-497173	0.0101452	7.68781	-8.75422	1.90465e-09	1.15903e-06	>DcitrP068425.1.1 Cathepsin F-like protein 5-RA. (AHRD V3.11 *** Cathepsin L tr|D6WR27|D6WR27_TRICA). Similar to MCOT20689.1.CO XP_017298414.1. AED 0.00| InterPro:IPR000668,Pfam:PF00112| GO:0006508,GO:0008234	GO:0006508	proteolysis	--	--	GO:0008234//GO:0004197	cysteine-type peptidase activity//cysteine-type endopeptidase activity	K01373 cathepsin F [EC:3.4.22.41] | (RefSeq) Ctsf; cathepsin F	http://www.genome.jp/dbget-bin/www_bget?api:100158959	DcitrP068425.1	Cathepsin F-like protein 5-RA. (AHRD V3.11 *** Cathepsin L tr|D6WR27|D6WR27_TRICA). Similar to MCOT20689.1.CO XP_017298414.1. AED 0.00
DcitrP090220.1	DcitrP090220.1	ScVcwli_3470:475726-488641	0	0.240042	-8.78478	0.000199167	0.0160968	>DcitrP090220.1.1 Blood vessel epicardial substance (AHRD V3.11 *** tr|A0A067QYU9|A0A067QYU9_ZOONE). Similar to MCOT21285.2.CT. AED 1.00| InterPro:IPR006916,Pfam:PF04831| GO:0016020	--	--	GO:0016020	membrane	GO:0016861	intramolecular oxidoreductase activity, interconverting aldoses and ketoses	K21108 blood vessel epicardial substance | (RefSeq) uncharacterized LOC100573090	http://www.genome.jp/dbget-bin/www_bget?api:100573090	DcitrP090220.1	Blood vessel epicardial substance (AHRD V3.11 *** tr|A0A067QYU9|A0A067QYU9_ZOONE). Similar to MCOT21285.2.CT. AED 1.00
DcitrP083765.1	DcitrP083765.1	ScVcwli_3372:488570-495826	0	0.398633	-8.91966	7.76976e-05	0.00784177	>DcitrP083765.1.1 Unknown protein. AED 0.31	--	--	--	--	GO:0016747	transferase activity, transferring acyl groups other than amino-acyl groups	--	--	DcitrP083765.1	Unknown protein. AED 0.31
DcitrP034590.1	DcitrP034590.1	ScVcwli_1319:936173-947866	0	0.285751	-8.92751	9.80667e-05	0.00935023	>DcitrP034590.1.1 D2-like dopamine receptor (AHRD V3.11 *-* tr|M4GWU0|M4GWU0_PERAM). Similar to XP_008470493.1. AED 0.25| InterPro:IPR000276,Pfam:PF00001| GO:0004930,GO:0007186,GO:0016021	GO:0007606//GO:0007186	sensory perception of chemical stimulus//G-protein coupled receptor signaling pathway	GO:0016021	integral component of membrane	GO:0004930	G-protein coupled receptor activity	K14049 dopamine D2-like receptor | (RefSeq) dopamine D2-like receptor	http://www.genome.jp/dbget-bin/www_bget?api:100166556	DcitrP034590.1	D2-like dopamine receptor (AHRD V3.11 *-* tr|M4GWU0|M4GWU0_PERAM). Similar to XP_008470493.1. AED 0.25
DcitrP062745.1	DcitrP062745.1	ScVcwli_2522:909323-922683	0	0.23702	-8.98652	2.25927e-07	6.97675e-05	>DcitrP062745.1.1 Unknown protein. AED 0.33	--	--	--	--	--	--	--	--	DcitrP062745.1	Unknown protein. AED 0.33
DcitrP056965.1	DcitrP056965.1	ScVcwli_2302:7832-115781	0	0.0343333	-9.00464	0.000812598	0.0431094	>DcitrP056965.1.1 G2/mitotic-specific cyclin-A (AHRD V3.11 *** tr|A0A067RLB0|A0A067RLB0_ZOONE). Similar to MCOT17727.1.CT XP_008472095.1. AED 0.29	--	--	GO:0005634	nucleus	--	--	K06627 cyclin A | (RefSeq) cyclin-A2	http://www.genome.jp/dbget-bin/www_bget?api:100160996	DcitrP056965.1	G2/mitotic-specific cyclin-A (AHRD V3.11 *** tr|A0A067RLB0|A0A067RLB0_ZOONE). Similar to MCOT17727.1.CT XP_008472095.1. AED 0.29
DcitrP068550.1	DcitrP068550.1	ScVcwli_2739:1018505-1021672	0.0779298	64.458	-9.09496	2.32058e-05	0.00305814	>DcitrP068550.1.1 Apolipoprotein D (AHRD V3.11 *-* tr|A0A0A1XBP1|A0A0A1XBP1_ZEUCU). AED 0.09	GO:0030682	evasion or tolerance of host defense response	--	--	--	--	K03098 apolipoprotein D and lipocalin family protein | (RefSeq) apolipoprotein D	http://www.genome.jp/dbget-bin/www_bget?api:100572774	DcitrP068550.1	Apolipoprotein D (AHRD V3.11 *-* tr|A0A0A1XBP1|A0A0A1XBP1_ZEUCU). AED 0.09
DcitrP048000.1	DcitrP048000.1	ScVcwli_1951:1485869-1518875	0	0.112296	-9.1776	1.82877e-05	0.0025621	>DcitrP048000.1.1 high mobility group protein DSP1 (AHRD V3.11 *-* tr|A0A1W4XPM3|A0A1W4XPM3_AGRPL). AED 0.52	--	--	--	--	--	--	K10802 high mobility group protein B1 | (RefSeq) high mobility group protein DSP1	http://www.genome.jp/dbget-bin/www_bget?api:100167132	DcitrP048000.1	high mobility group protein DSP1 (AHRD V3.11 *-* tr|A0A1W4XPM3|A0A1W4XPM3_AGRPL). AED 0.52
DcitrP102640.1	DcitrP102640.1	ScVcwli_3657:143951-148011	0	1.07035	-9.20929	1.48428e-05	0.00216266	>DcitrP102640.1.1 Unknown protein. AED 0.00	--	--	--	--	--	--	--	--	DcitrP102640.1	Unknown protein. AED 0.00||Unknown protein. AED 0.14
DcitrP039235.1	DcitrP039235.1	ScVcwli_1535:3105709-3139761	0	0.1142	-9.23918	1.16843e-05	0.00183142	>DcitrP039235.1.1 DNAation factor subunit beta (AHRD V3.11 *-* tr|A0A146LJ53|A0A146LJ53_LYGHE). AED 0.67	GO:0006915	apoptotic process	GO:0005622	intracellular	--	--	no KO assigned | (RefSeq) Y-y; yellow-y	http://www.genome.jp/dbget-bin/www_bget?api:100162062	DcitrP039235.1	DNAation factor subunit beta (AHRD V3.11 *-* tr|A0A146LJ53|A0A146LJ53_LYGHE). AED 0.67
DcitrP066655.1	DcitrP066655.1	ScVcwli_2663:286490-301456	0	0.279121	-9.29079	1.07878e-05	0.00172475	>DcitrP066655.1.1 Unknown protein. AED 0.77	--	--	--	--	--	--	--	--	DcitrP066655.1	Unknown protein. AED 0.77
DcitrP060695.1	DcitrP060695.1	ScVcwli_2457:966503-986550	0	0.232388	-9.41515	0.000282477	0.0211755	>DcitrP060695.1.1 Unknown protein. AED 0.03	--	--	--	--	GO:0046872//GO:0000166	metal ion binding//nucleotide binding	K01539 sodium/potassium-transporting ATPase subunit alpha [EC:3.6.3.9] | (RefSeq) sodium/potassium-transporting ATPase subunit alpha-like	http://www.genome.jp/dbget-bin/www_bget?api:103310367	DcitrP060695.1	Unknown protein. AED 0.03
XLOC_026819	XLOC_026819	ScVcwli_3595:3521616-3523880	0.023443	23.2922	-9.45487	4.49827e-08	1.66195e-05		--	--	--	--	--	--	--	--	--	--
DcitrP041030.1	DcitrP041030.1	ScVcwli_1643:803927-840386	0	0.12899	-9.50431	4.54848e-06	0.000863377	>DcitrP041030.1.1 JNK-interacting protein 1 (AHRD V3.11 *** tr|A0A194Q4Z5|A0A194Q4Z5_PAPXU). Similar to MCOT07739.0.MT. AED 0.01	--	--	--	--	GO:0005515	protein binding	no KO assigned | (RefSeq) JNK-interacting protein 1	http://www.genome.jp/dbget-bin/www_bget?api:100165593	DcitrP041030.1	JNK-interacting protein 1 (AHRD V3.11 *** tr|A0A194Q4Z5|A0A194Q4Z5_PAPXU). Similar to MCOT07739.0.MT. AED 0.01
DcitrP002040.1	DcitrP002040.1	ScVcwli_96:9078-12977	0.0037305	5.8811	-9.51752	3.57739e-09	1.93936e-06	>DcitrP002040.1.1 Unknown protein. AED 0.09	--	--	--	--	--	--	no KO assigned | (RefSeq) RNA-directed DNA polymerase from mobile element jockey-like	http://www.genome.jp/dbget-bin/www_bget?api:103311688	DcitrP002040.1	Unknown protein. AED 0.09
DcitrP101115.1	DcitrP101115.1	ScVcwli_3628:89085-101901	0	0.454855	-9.56406	0.000214357	0.0169925	>DcitrP101115.1.1 Unknown protein. AED 0.08	--	--	--	--	GO:0005515//GO:0046872	protein binding//metal ion binding	--	--	DcitrP101115.1	Unknown protein. AED 0.08||Unknown protein. AED 0.66
XLOC_020968	XLOC_020968	ScVcwli_3343:352067-359562	0	0.724751	-9.73756	2.24571e-06	0.000505041		--	--	--	--	--	--	--	--	--	--
DcitrP029635.1	DcitrP029635.1	ScVcwli_1123:842424-851758	0	0.682153	-9.90043	3.65563e-09	1.93936e-06	>DcitrP029635.1.1 cathepsin B-like cysteine proteinase 5-RA. (AHRD V3.11 *** Cathepsin B tr|R4WR66|R4WR66_RIPPE). AED 0.10| InterPro:IPR000668,Pfam:PF00112| GO:0006508,GO:0008234	GO:0006508	proteolysis	--	--	GO:0004100//GO:0004197//GO:0008234	chitin synthase activity//cysteine-type endopeptidase activity//cysteine-type peptidase activity	K01363 cathepsin B [EC:3.4.22.1] | (RefSeq) Catb-1418; cathepsin B-1418	http://www.genome.jp/dbget-bin/www_bget?api:100144782	DcitrP029635.1	cathepsin B-like cysteine proteinase 5-RA. (AHRD V3.11 *** Cathepsin B tr|R4WR66|R4WR66_RIPPE). AED 0.10
DcitrP016100.1	DcitrP016100.1	ScVcwli_648:66881-71973	0	1.5654	-10.1764	3.40566e-07	9.65249e-05	>DcitrP016100.1.1 Cathepsin F-like protein 5-RA. (AHRD V3.11 *** Cathepsin L tr|R4WRV6|R4WRV6_RIPPE). Similar to MCOT22725.0.CT XP_017297994.1. AED 0.00| InterPro:IPR000668,Pfam:PF00112| GO:0006508,GO:0008234	GO:0007155//GO:0006508	cell adhesion//proteolysis	GO:0009288	bacterial-type flagellum	GO:0008234//GO:0004197	cysteine-type peptidase activity//cysteine-type endopeptidase activity	K01373 cathepsin F [EC:3.4.22.41] | (RefSeq) Ctsf; cathepsin F	http://www.genome.jp/dbget-bin/www_bget?api:100158959	DcitrP016100.1	Cathepsin F-like protein 5-RA. (AHRD V3.11 *** Cathepsin L tr|R4WRV6|R4WRV6_RIPPE). Similar to MCOT22725.0.CT XP_017297994.1. AED 0.00
XLOC_024610	XLOC_024610	ScVcwli_3502:37031-57622	0	0.418746	-10.2559	0.000704424	0.0388654		--	--	--	--	--	--	--	--	--	--
XLOC_013794	XLOC_013794	ScVcwli_2537:10266-46705	0	0.280423	-10.357	0.000589817	0.0338835		--	--	--	--	--	--	--	--	--	--
DcitrP055350.1	DcitrP055350.1	ScVcwli_2255:917535-922986	0.616344	1233.76	-10.3721	1.51135e-13	3.47443e-10	>DcitrP055350.1.1 Salivary secreted protein (AHRD V3.11 *** tr|A6YPI9|A6YPI9_TRIIF). Similar to MCOT19869.1.CC XP_008487490.1. AED 0.28	--	--	--	--	--	--	--	--	DcitrP055350.1	Unknown protein. AED 0.17||Salivary secreted protein (AHRD V3.11 *** tr|A6YPI9|A6YPI9_TRIIF). Similar to MCOT19869.1.CC XP_008487490.1. AED 0.26||Unknown protein. Similar to MCOT19869.1.CC XP_008487490.1. AED 0.13||Salivary secreted protein (AHRD V3.11 *** tr|A6YPI9|A6YPI9_TRIIF). Similar to MCOT19869.1.CC XP_008487490.1. AED 0.28||Salivary secreted protein (AHRD V3.11 *** tr|A6YPI9|A6YPI9_TRIIF)…
DcitrP091230.1	DcitrP091230.1	ScVcwli_3484:149586-156379	0	1.38058	-10.3795	1.26598e-07	4.36552e-05	>DcitrP091230.1.1 Transferrin (AHRD V3.11 *-* tr|A0A1B6HWX7|A0A1B6HWX7_9HEMI). Similar to MCOT05158.0.CO XP_017302363.1. AED 0.00| InterPro:IPR001156,Pfam:PF00405	--	--	--	--	--	--	no KO assigned | (RefSeq) transferrin	http://www.genome.jp/dbget-bin/www_bget?api:100159832	DcitrP091230.1	Transferrin (AHRD V3.11 *-* tr|A0A1B6HWX7|A0A1B6HWX7_9HEMI). Similar to MCOT05158.0.CO XP_017302363.1. AED 0.00
DcitrP010820.1	DcitrP010820.1	ScVcwli_458:552087-558626	0	1.63096	-10.5492	1.60263e-07	5.26324e-05	>DcitrP010820.1.1 Cathepsin F-like protein 5-RA. (AHRD V3.11 *** Cathepsin L tr|A0A0A9Z5X6|A0A0A9Z5X6_LYGHE). Similar to MCOT22725.0.CT XP_017297994.1. AED 0.00| InterPro:IPR000668,Pfam:PF00112| GO:0006508,GO:0008234	GO:0006508	proteolysis	--	--	GO:0004197//GO:0008234	cysteine-type endopeptidase activity//cysteine-type peptidase activity	K01373 cathepsin F [EC:3.4.22.41] | (RefSeq) Ctsf; cathepsin F	http://www.genome.jp/dbget-bin/www_bget?api:100158959	DcitrP010820.1	Cathepsin F-like protein 5-RA. (AHRD V3.11 *** Cathepsin L tr|A0A0A9Z5X6|A0A0A9Z5X6_LYGHE). Similar to MCOT22725.0.CT XP_017297994.1. AED 0.00
DcitrP098205.1	DcitrP098205.1	ScVcwli_3580:546822-589992	0	0.243227	-10.5914	1.53143e-07	5.11053e-05	>DcitrP098205.1.1 Nicotinic acetylcholine receptor subunit (AHRD V3.11 *** tr|A0A1S4FID0|A0A1S4FID0_AEDAE). AED 0.00	GO:0006811//GO:0006810	ion transport//transport	GO:0016020	membrane	GO:0005230	extracellular ligand-gated ion channel activity	K05312 nicotinic acetylcholine receptor, invertebrate | (RefSeq) acetylcholine receptor subunit alpha-type acr-16	http://www.genome.jp/dbget-bin/www_bget?api:100162309	DcitrP098205.1	Nicotinic acetylcholine receptor subunit (AHRD V3.11 *** tr|A0A1S4FID0|A0A1S4FID0_AEDAE). AED 0.00
XLOC_016386	XLOC_016386	ScVcwli_2811:536605-582661	0	0.263068	-10.6017	0.000440577	0.0283973		--	--	--	--	--	--	--	--	--	--
DcitrP032520.1	DcitrP032520.1	ScVcwli_1228:606712-618340	0	0.904903	-10.6116	6.83783e-08	2.43922e-05	>DcitrP032520.1.1 Unknown protein. AED 0.27	--	--	--	--	--	--	--	--	DcitrP032520.1	Unknown protein. AED 0.27
XLOC_005299	XLOC_005299	ScVcwli_1555:206187-240606	0	0.327354	-10.6421	0.000445823	0.0285575		--	--	--	--	--	--	--	--	--	--
DcitrP080130.1	DcitrP080130.1	ScVcwli_3308:616185-670105	0	0.212807	-10.6823	2.23651e-05	0.00303487	>DcitrP080130.1.1 CG17716-PA (AHRD V3.11 *-* FBpp0086751). Similar to MCOT05134.0.CT XP_008471903.1. AED 0.02	GO:0007155	cell adhesion	GO:0016021	integral component of membrane	GO:0005515	protein binding	no KO assigned | (RefSeq) CD166 antigen	http://www.genome.jp/dbget-bin/www_bget?api:100575358	DcitrP080130.1	CG17716-PA (AHRD V3.11 *-* FBpp0086751). Similar to MCOT05134.0.CT XP_008471903.1. AED 0.02
XLOC_003262	XLOC_003262	ScVcwli_1292:94312-137506	0	0.289982	-10.8615	0.000376776	0.0258914		--	--	--	--	--	--	--	--	--	--
DcitrP047820.1	DcitrP047820.1	ScVcwli_1951:605452-683751	0	0.187762	-10.9297	1.64725e-07	5.32524e-05	>DcitrP047820.1.1 Tetraspanin (AHRD V3.11 *** tr|E2B773|E2B773_HARSA). Similar to MCOT06979.0.OO. AED 0.29| InterPro:IPR018499,Pfam:PF00335| GO:0016021	--	--	GO:0016021	integral component of membrane	--	--	no KO assigned | (RefSeq) 23 kDa integral membrane protein	http://www.genome.jp/dbget-bin/www_bget?api:100163944	DcitrP047820.1	Tetraspanin (AHRD V3.11 *** tr|E2B773|E2B773_HARSA). Similar to MCOT06979.0.OO. AED 0.29
XLOC_015272	XLOC_015272	ScVcwli_2677:426426-450003	0	0.684608	-11.1575	7.99468e-06	0.00133395		--	--	--	--	--	--	--	--	--	--
XLOC_023617	XLOC_023617	ScVcwli_3470:1433664-1463689	0	0.42518	-11.1895	1.43302e-05	0.0021178		--	--	--	--	--	--	--	--	--	--
DcitrP081525.1	DcitrP081525.1	ScVcwli_3334:541851-543091	0	14.3888	-11.2657	1.52654e-09	1.0528e-06	>DcitrP081525.1.1 26S proteasome non-ATPase regulatory subunit 11 (AHRD V3.11 *** tr|A0A1W4X0A7|A0A1W4X0A7_AGRPL). Similar to MCOT21228.2.CT XP_017305419.1. AED 0.06	GO:0009401//GO:0006457	phosphoenolpyruvate-dependent sugar phosphotransferase system//protein folding	--	--	GO:0042803//GO:0005515//GO:0051087//GO:0000774	protein homodimerization activity//protein binding//chaperone binding//adenyl-nucleotide exchange factor activity	K03036 26S proteasome regulatory subunit N6 | (RefSeq) 26S proteasome non-ATPase regulatory subunit 11	http://www.genome.jp/dbget-bin/www_bget?api:100159574	DcitrP081525.1	26S proteasome non-ATPase regulatory subunit 11 (AHRD V3.11 *** tr|A0A1W4X0A7|A0A1W4X0A7_AGRPL). Similar to MCOT21228.2.CT XP_017305419.1. AED 0.06
DcitrP068965.1	DcitrP068965.1	ScVcwli_2777:366458-368228	0	9.8497	-11.4583	5.61698e-06	0.00101943	>DcitrP068965.1.1 UPF0585 protein C16orf13 (AHRD V3.11 *** tr|A0A0A9Y822|A0A0A9Y822_LYGHE). AED 0.21| InterPro:IPR010342,Pfam:PF06080	GO:0006400	tRNA modification	--	--	GO:0008176	tRNA (guanine-N7-)-methyltransferase activity	K15001 cytochrome P450 family 4 [EC:1.14.-.-] | (RefSeq) cytochrome P450 4C1	http://www.genome.jp/dbget-bin/www_bget?api:100162179	DcitrP068965.1	UPF0585 protein C16orf13 (AHRD V3.11 *** tr|A0A0A9Y822|A0A0A9Y822_LYGHE). AED 0.21
DcitrP055355.1	DcitrP055355.1	ScVcwli_2255:926030-928122	0.0971935	413.281	-11.5643	4.26632e-12	8.08601e-09	>DcitrP055355.1.1 CLUMA_CG014341, isoform A (AHRD V3.11 *** tr|A0A1J1IMJ1|A0A1J1IMJ1_9DIPT). AED 0.00| InterPro:IPR031734,Pfam:PF15868	--	--	--	--	--	--	--	--	DcitrP055355.1	CLUMA_CG014341, isoform A (AHRD V3.11 *** tr|A0A1J1IMJ1|A0A1J1IMJ1_9DIPT). AED 0.00
XLOC_001415	XLOC_001415	ScVcwli_1105:2093737-2154692	0	0.358669	-11.5795	6.13291e-06	0.00109388		--	--	--	--	--	--	--	--	--	--
DcitrP009550.1	DcitrP009550.1	ScVcwli_425:349615-354869	0	5.6285	-11.9336	4.7905e-09	2.47789e-06	>DcitrP009550.1.1 cathepsin B-like protein 8-RA. (AHRD V3.11 *** Cathepsin B tr|R4WU53|R4WU53_RIPPE). Similar to MCOT01442.0.CT XP_008471035.1. AED 0.09| InterPro:IPR000668,Pfam:PF00112| GO:0006508,GO:0008234	GO:0050790//GO:0007608//GO:0007165//GO:0006508	regulation of catalytic activity//sensory perception of smell//signal transduction//proteolysis	--	--	GO:0004871//GO:0008234//GO:0004197	signal transducer activity//cysteine-type peptidase activity//cysteine-type endopeptidase activity	K01363 cathepsin B [EC:3.4.22.1] | (RefSeq) Catb-348; cathepsin B-348	http://www.genome.jp/dbget-bin/www_bget?api:100144775	DcitrP009550.1	cathepsin B-like protein 8-RC. (AHRD V3.11 *** Cathepsin B tr|R4WU53|R4WU53_RIPPE). Similar to MCOT01442.0.CT XP_008471035.1. AED 0.03||cathepsin B-like protein 8-RA. (AHRD V3.11 *** Cathepsin B tr|R4WU53|R4WU53_RIPPE). Similar to MCOT01442.0.CT XP_008471035.1. AED 0.09||cathepsin B-like protein 8-RD. (AHRD V3.11 *** Cathepsin B tr|R4WU53|R4WU53_RIPPE). Similar to MCOT01442.0.CT XP_008471035.1. A…
XLOC_001171	XLOC_001171	ScVcwli_1076:504313-589516	0	0.342241	-12.0128	0.000140736	0.0123382		--	--	--	--	--	--	--	--	--	--
DcitrP078015.1	DcitrP078015.1	ScVcwli_3184:479642-481431	0	16.3091	-12.1304	5.06447e-10	4.19135e-07	>DcitrP078015.1.1 Unknown protein. Similar to MCOT22272.1.CO. AED 0.00	--	--	--	--	--	--	--	--	DcitrP078015.1	Unknown protein. Similar to MCOT22272.1.CO. AED 0.00
DcitrP077910.1	DcitrP077910.1	ScVcwli_3184:116240-117542	0	27.0949	-12.2757	3.64569e-10	3.27953e-07	>DcitrP077910.1.1 Unknown protein. Similar to MCOT22272.1.CO. AED 0.00	--	--	--	--	--	--	--	--	DcitrP077910.1	Unknown protein. Similar to MCOT22272.1.CO. AED 0.00
DcitrP017825.1	DcitrP017825.1	ScVcwli_744:572418-619028	0	1.18584	-12.5917	1.54943e-10	1.68724e-07	>DcitrP017825.1.1 Inward rectifier potassium channel (AHRD V3.11 *** tr|T1PFR2|T1PFR2_MUSDO). Similar to MCOT17009.0.CO XP_008480641.1. AED 0.11| InterPro:IPR016449,Pfam:PF01007| GO:0005242,GO:0006813,GO:0016021	GO:0006813	potassium ion transport	GO:0016021	integral component of membrane	GO:0005242	inward rectifier potassium channel activity	K05330 potassium inwardly-rectifying channel subfamily J, other | (RefSeq) G protein-activated inward rectifier potassium channel 3-like	http://www.genome.jp/dbget-bin/www_bget?api:100166535	DcitrP017825.1	Inward rectifier potassium channel (AHRD V3.11 *-* tr|A0A2A3EA47|A0A2A3EA47_APICC). Similar to MCOT17009.0.CO XP_008480641.1. AED 0.10||Inward rectifier potassium channel (AHRD V3.11 *** tr|T1PFR2|T1PFR2_MUSDO). Similar to MCOT17009.0.CO XP_008480641.1. AED 0.11
DcitrP072815.1	DcitrP072815.1	ScVcwli_2919:256780-287419	0	2.32196	-13.272	9.84302e-11	1.1314e-07	>DcitrP072815.1.1 Maltase (AHRD V3.11 *** tr|A0A026WKS8|A0A026WKS8_OOCBI). Similar to MCOT02261.0.CT. AED 0.12	GO:0005975	carbohydrate metabolic process	--	--	GO:0003824//GO:0043169	catalytic activity//cation binding	no KO assigned | (RefSeq) maltase 2	http://www.genome.jp/dbget-bin/www_bget?api:100160111	DcitrP072815.1	Maltase (AHRD V3.11 *** tr|A0A026WKS8|A0A026WKS8_OOCBI). Similar to MCOT02261.0.CT. AED 0.12
DcitrP096605.1	DcitrP096605.1	ScVcwli_3542:621872-659679	0	3.10721	-14.001	1.88984e-11	2.79292e-08	>DcitrP096605.1.1 AGAP004851-PA (AHRD V3.11 *** tr|Q7Q953|Q7Q953_ANOGA). Similar to MCOT19480.0.CC XP_008478426.1. AED 0.30	GO:0006030	chitin metabolic process	GO:0005634//GO:0005576	nucleus//extracellular region	GO:0008270//GO:0008061	zinc ion binding//chitin binding	K01183 chitinase [EC:3.2.1.14] | (RefSeq) mucin-5AC	http://www.genome.jp/dbget-bin/www_bget?api:100160065	DcitrP096605.1	AGAP004851-PA (AHRD V3.11 *** tr|Q7Q953|Q7Q953_ANOGA). Similar to MCOT19480.0.CC XP_008478426.1. AED 0.30||AGAP004851-PA (AHRD V3.11 *** tr|Q7Q953|Q7Q953_ANOGA). Similar to MCOT19480.0.CC XP_008478426.1. AED 0.33
DcitrP078070.1	DcitrP078070.1	ScVcwli_3184:482907-488570	0	33.0947	-14.3578	4.9152e-12	8.47463e-09	>DcitrP078070.1.1 Unknown protein. AED 0.42	--	--	--	--	--	--	--	--	DcitrP078070.1	Unknown protein. AED 0.42||Unknown protein. AED 0.33||Unknown protein. AED 0.32
DcitrP015550.1	DcitrP015550.1	ScVcwli_620:1864050-1869215	0	121.354	-16.4096	1.38496e-11	2.20421e-08	>DcitrP015550.1.1 Polycalin (AHRD V3.11 --* tr|F6K718|F6K718_9NEOP). Similar to MCOT16516.0.CC XP_008487527.1. AED 0.00	--	--	--	--	--	--	--	--	DcitrP015550.1	Polycalin (AHRD V3.11 --* tr|F6K718|F6K718_9NEOP). Similar to MCOT16516.0.CC XP_008487527.1. AED 0.00
