# Supplementary material for: A Transcriptomic and Proteomic Analysis of the Diaphorina citri Salivary Glands Reveals Genes Responding to Candidatus Liberibacter asiaticus
Source: Front Physiol. 2020 Sep 25;11:582505. doi: 10.3389/fphys.2020.582505 (PMC7546269; doi:10.3389/fphys.2020.582505)
Supplement: TABLE S6 — Differentially expressed genes (DEGs) with a putative signal peptide. [file Data_Sheet_6.xlsx]

## Sheet: Sheet1
gene_id	gene_name	gene_locus	SG_HLB_FPKM	SG_CK_FPKM	log2FoldChange	pvalue	padj
DcitrP080720.1	DcitrP080720.1	ScVcwli_3312:1112458-1180772	0.0859055	0	10.2645	2.32435e-07	7.07218e-05
DcitrP033855.1	DcitrP033855.1	ScVcwli_1282:39575-60977	0.170532	0	9.61704	8.96992e-10	6.62813e-07
DcitrP021250.1	DcitrP021250.1	ScVcwli_870:956650-968628	0.235369	0	9.18935	0.000521926	0.0317607
DcitrP077305.1	DcitrP077305.1	ScVcwli_3161:49188-124008	0.0368685	0	9.17143	0.000538617	0.0323014
DcitrP069980.1	DcitrP069980.1	ScVcwli_2811:27449-47828	0.086196	0	8.52587	0.000306781	0.022498
DcitrP029815.1	DcitrP029815.1	ScVcwli_1123:1831901-1852368	0.0618153	0	8.0978	6.0896e-05	0.00663125
DcitrP050970.1	DcitrP050970.1	ScVcwli_2098:111496-113321	0.558247	0	7.80053	0.000132686	0.0117319
DcitrP084155.1	DcitrP084155.1	ScVcwli_3379:57494-61540	0.230467	0	7.65681	0.00027762	0.0208871
DcitrP008700.1	DcitrP008700.1	ScVcwli_395:129234-130401	27.7478	2.87118	3.75007	1.27922e-13	3.30838e-10
DcitrP022120.1	DcitrP022120.1	ScVcwli_910:1967673-1983301	854.533	162.249	2.84887	4.29899e-12	8.08601e-09
DcitrP011900.1	DcitrP011900.1	ScVcwli_493:13915-37603	5.12668	1.28331	2.58491	1.8558e-06	0.000426628
DcitrP022115.1	DcitrP022115.1	ScVcwli_910:1957024-1965519	1636.62	357.091	2.5824	1.00551e-08	4.42638e-06
DcitrP100115.1	DcitrP100115.1	ScVcwli_3598:1438784-1442913	14.6159	3.52926	2.53091	8.83327e-07	0.000231342
DcitrP038140.1	DcitrP038140.1	ScVcwli_1495:28555-43934	0.965884	0.324184	2.05058	1.45907e-05	0.002141
DcitrP030465.1	DcitrP030465.1	ScVcwli_1137:157428-158343	45.3512	18.6342	1.89285	0.00045271	0.0287318
DcitrP045045.1	DcitrP045045.1	ScVcwli_1840:16701-20053	125.933	51.7994	1.7435	1.90885e-07	6.076e-05
DcitrP010180.1	DcitrP010180.1	ScVcwli_439:954939-957089	8.70852	3.78717	1.71975	0.00036245	0.0251647
DcitrP053520.1	DcitrP053520.1	ScVcwli_2175:2035682-2042737	33.8176	15.7861	1.60735	2.44086e-06	0.000535382
DcitrP056755.1	DcitrP056755.1	ScVcwli_2275:696624-780753	0.511836	0.229994	1.60183	0.000794841	0.0423847
DcitrP069505.1	DcitrP069505.1	ScVcwli_2805:334062-337723	1450.93	708.836	1.50643	0.000252962	0.0193951
DcitrP081455.1	DcitrP081455.1	ScVcwli_3334:417082-419713	6453.59	3302.08	1.39757	0.000374599	0.0258348
DcitrP050505.1	DcitrP050505.1	ScVcwli_2056:473241-512789	1.19997	0.656774	1.38158	0.000830915	0.0435589
DcitrP081740.1	DcitrP081740.1	ScVcwli_3338:639445-640990	1435.63	801.217	1.33077	7.6934e-06	0.00131551
DcitrP063055.1	DcitrP063055.1	ScVcwli_2551:21349-22398	1748.07	1044.46	1.23135	2.91152e-05	0.00365087
DcitrP017380.1	DcitrP017380.1	ScVcwli_705:535255-536459	116.849	74.285	1.18469	0.000431466	0.0280725
DcitrP016435.1	DcitrP016435.1	ScVcwli_663:205401-284986	3.76106	2.3866	1.16262	0.000752228	0.040636
DcitrP022450.1	DcitrP022450.1	ScVcwli_921:97136-98401	1440.95	878.371	1.16211	0.000437665	0.0283865
DcitrP037890.1	DcitrP037890.1	ScVcwli_1465:26635-30054	4163.85	2586.69	1.16162	0.00012579	0.0112666
DcitrP030870.1	DcitrP030870.1	ScVcwli_1145:521288-522134	5879.02	3704.82	1.14799	6.81031e-05	0.00715255
DcitrP027035.1	DcitrP027035.1	ScVcwli_1039:1840644-1893915	2044.7	1311.33	1.0919	0.000792681	0.0423787
DcitrP023480.1	DcitrP023480.1	ScVcwli_950:108006-113349	9077.95	5894.42	1.06809	0.000857616	0.0443602
DcitrP081735.1	DcitrP081735.1	ScVcwli_3338:637184-641017	2037.05	1378.42	1.06382	0.00062292	0.0351178
DcitrP041975.1	DcitrP041975.1	ScVcwli_1677:129234-130745	2893.03	1921.95	1.0433	0.000710015	0.0390697
DcitrP081725.1	DcitrP081725.1	ScVcwli_3338:629906-632050	15644.3	10750.2	1.02063	0.000552517	0.0326212
DcitrP094660.1	DcitrP094660.1	ScVcwli_3523:298404-302355	529.377	374.829	0.98251	0.000856223	0.0443602
DcitrP076625.1	DcitrP076625.1	ScVcwli_3135:227337-228734	57.712	169.713	-1.06789	0.000751972	0.040636
DcitrP034510.1	DcitrP034510.1	ScVcwli_1319:396575-458323	0.965468	3.0314	-1.1415	0.000841406	0.0438506
DcitrP103175.1	DcitrP103175.1	ScVcwli_3668:272-8686	5.56911	18.3553	-1.22422	0.000796981	0.0423895
DcitrP067100.1	DcitrP067100.1	ScVcwli_2677:193496-233577	3.02098	10.8655	-1.34597	5.24376e-05	0.00577092
DcitrP011585.1	DcitrP011585.1	ScVcwli_483:1148780-1164484	0.1624	1.4431	-2.52489	0.000311658	0.0226253
XLOC_006498	XLOC_006498	ScVcwli_1697:314831-317254	0.989688	28.9311	-4.45187	9.19083e-07	0.000237698
DcitrP012970.1	DcitrP012970.1	ScVcwli_521:1716248-1718332	0.120472	5.21196	-4.83921	1.98161e-05	0.00275164
DcitrP009555.1	DcitrP009555.1	ScVcwli_425:355042-360569	0.036114	3.29611	-5.68535	0.000562692	0.0330741
DcitrP019625.1	DcitrP019625.1	ScVcwli_839:187163-194010	0.0058625	0.582957	-5.82448	8.04954e-05	0.00804565
DcitrP006220.1	DcitrP006220.1	ScVcwli_284:698928-710607	0.153367	25.8411	-6.72077	4.09265e-07	0.000114428
DcitrP091865.1	DcitrP091865.1	ScVcwli_3489:473791-482750	0.0086685	1.59341	-6.92749	4.69712e-05	0.00522492
DcitrP036010.1	DcitrP036010.1	ScVcwli_1367:76581-78244	0.0169397	9.89111	-8.12086	1.64613e-05	0.00234885
DcitrP084720.1	DcitrP084720.1	ScVcwli_3393:436853-485692	0	0.0401245	-8.14568	4.44604e-05	0.0050267
DcitrP059455.1	DcitrP059455.1	ScVcwli_2431:39187-46071	0	0.278085	-8.25256	0.000597288	0.0340309
DcitrP015530.1	DcitrP015530.1	ScVcwli_620:1901742-1910393	0.0848997	57.9242	-8.69291	2.69819e-06	0.000581516
DcitrP048000.1	DcitrP048000.1	ScVcwli_1951:1485869-1518875	0	0.112296	-9.1776	1.82877e-05	0.0025621
DcitrP102640.1	DcitrP102640.1	ScVcwli_3657:143951-148011	0	1.07035	-9.20929	1.48428e-05	0.00216266
DcitrP060695.1	DcitrP060695.1	ScVcwli_2457:966503-986550	0	0.232388	-9.41515	0.000282477	0.0211755
XLOC_026819	XLOC_026819	ScVcwli_3595:3521616-3523880	0.023443	23.2922	-9.45487	4.49827e-08	1.66195e-05
DcitrP029635.1	DcitrP029635.1	ScVcwli_1123:842424-851758	0	0.682153	-9.90043	3.65563e-09	1.93936e-06
DcitrP016100.1	DcitrP016100.1	ScVcwli_648:66881-71973	0	1.5654	-10.1764	3.40566e-07	9.65249e-05
DcitrP055350.1	DcitrP055350.1	ScVcwli_2255:917535-922986	0.616344	1233.76	-10.3721	1.51135e-13	3.47443e-10
DcitrP091230.1	DcitrP091230.1	ScVcwli_3484:149586-156379	0	1.38058	-10.3795	1.26598e-07	4.36552e-05
DcitrP010820.1	DcitrP010820.1	ScVcwli_458:552087-558626	0	1.63096	-10.5492	1.60263e-07	5.26324e-05
DcitrP032520.1	DcitrP032520.1	ScVcwli_1228:606712-618340	0	0.904903	-10.6116	6.83783e-08	2.43922e-05
DcitrP055355.1	DcitrP055355.1	ScVcwli_2255:926030-928122	0.0971935	413.281	-11.5643	4.26632e-12	8.08601e-09
DcitrP009550.1	DcitrP009550.1	ScVcwli_425:349615-354869	0	5.6285	-11.9336	4.7905e-09	2.47789e-06
DcitrP078015.1	DcitrP078015.1	ScVcwli_3184:479642-481431	0	16.3091	-12.1304	5.06447e-10	4.19135e-07
DcitrP077910.1	DcitrP077910.1	ScVcwli_3184:116240-117542	0	27.0949	-12.2757	3.64569e-10	3.27953e-07
DcitrP072815.1	DcitrP072815.1	ScVcwli_2919:256780-287419	0	2.32196	-13.272	9.84302e-11	1.1314e-07
DcitrP096605.1	DcitrP096605.1	ScVcwli_3542:621872-659679	0	3.10721	-14.001	1.88984e-11	2.79292e-08
DcitrP078070.1	DcitrP078070.1	ScVcwli_3184:482907-488570	0	33.0947	-14.3578	4.9152e-12	8.47463e-09
DcitrP015550.1	DcitrP015550.1	ScVcwli_620:1864050-1869215	0	121.354	-16.4096	1.38496e-11	2.20421e-08
